# Supplementary material for: Donor–acceptor-stabilised germanium analogues of acid chloride, ester, and acyl pyrrole compounds: synthesis and reactivity
Source: PubMed Central journal article supplement — Chem Sci. 2019 Feb 18;10(16):4402–11. doi: 10.1039/c8sc05380d (PMC6472437; doi:10.1039/c8sc05380d), 2019-02-18
Supplement: SC-010-C8SC05380D-s001.pdf [file SC-010-C8SC05380D-s001.pdf]

*Supporting Information*

**Donor–acceptor-stabilised germanium analogues of acid chloride,  
ester, and acyl pyrrole compounds: synthesis and reactivity**

Mahendra Kumar Sharma,<sup>a</sup> Soumen Sinhababu,<sup>a</sup> Pritam Mahawar,<sup>a</sup> Goutam Mukherjee,<sup>a</sup>

Bhawana Pandey,<sup>b</sup> Gopalan Rajaraman<sup>b</sup> and Selvarajan Nagendran<sup>a\*</sup>

<sup>a</sup>*Department of Chemistry, Indian Institute of Technology Delhi, Hauz Khas, New Delhi*

*110016, India*

<sup>b</sup>*Department of Chemistry, Indian Institute of Technology Bombay, Powai, Mumbai 400076,*

*India*

## CONTENTS

|   |                                                                                                                                                                                                      | Page no. |
|---|------------------------------------------------------------------------------------------------------------------------------------------------------------------------------------------------------|----------|
| 1 | Experimental Section (that includes Schemes S1 and Figure S0)                                                                                                                                        | 3        |
| 2 | NMR Spectra of Compounds <b>D1</b> , <b>D3-D5</b> , <b>1-7</b> , <b>9</b> , and <b>10</b> (that include Figures S1-S42)                                                                              | 14       |
| 3 | NMR Spectra of the Products Obtained from the Reactions of Compounds <b>D1</b> , <b>D2</b> , and <b>D5</b> with $\text{BF}_3$ , $\text{GeCl}_2$ , and $\text{SnCl}_2$ (that include Figures S43-S51) | 35       |
| 4 | UV-vis Spectra of Compounds <b>1</b> , <b>2</b> , and <b>10</b> (that include Table S1 and Figure S52)                                                                                               | 40       |
| 5 | Molecular Structure Determination of Compounds <b>D1</b> , <b>D3-D5</b> , <b>1-7</b> , <b>9</b> , and <b>10</b> (that includes Tables S2-S5 and Figures S53-S62)                                     | 43       |
| 6 | Computational Details (that include Tables S6-S7 and Figures S63-S69)                                                                                                                                | 62       |
| 7 | Coordinates of the Optimized Geometries of Compounds <b>1</b> , <b>2</b> , <b>3</b> , and <b>10</b>                                                                                                  | 72       |
| 8 | References                                                                                                                                                                                           | 86       |

## 1. Experimental Section

All the manipulations were performed using either standard Schlenk or glove box [Jacomex GP(Concept)-T2] techniques. Germylenes **G1**, **G2**, and **G5** were synthesized by following literature procedures.<sup>S1-S3</sup> Solvents were dried using conventional methods. B(C<sub>6</sub>F<sub>5</sub>)<sub>3</sub> and N<sub>2</sub>O (99.99% purity) were purchased from Sigma Aldrich and Sigma gases, respectively, and used without further purification. <sup>1</sup>H, <sup>13</sup>C, <sup>11</sup>B, <sup>19</sup>F, and <sup>29</sup>Si NMR spectra were recorded on a 300/400 MHz Bruker Topspin spectrometer. The chemical shifts  $\delta$  are reported in ppm and are referenced internally with respect to the residual solvent (<sup>1</sup>H NMR) and solvent (<sup>13</sup>C NMR) resonances. For <sup>11</sup>B, <sup>19</sup>F, and <sup>29</sup>Si NMR spectroscopic studies, BF<sub>3</sub>·Et<sub>2</sub>O, CFC<sub>3</sub>, and (CH<sub>3</sub>)<sub>4</sub>Si were used as external references, respectively. Melting points were recorded using Unitech Sales digital melting point apparatus by sealing the samples in glass capillaries, and the reported melting points are uncorrected. Elemental analyses were carried out using a Perkin-Elmer CHN analyzer.

### General synthetic route for amidogermynes (*i*-Bu)<sub>2</sub>ATiGeN(H)Ph (**G3**) and (*i*-Bu)<sub>2</sub>ATiGeN(Me)Ph (**G4**).

To a solution of (*i*-Bu)<sub>2</sub>ATiGeCl (**G1**) in hexane (15 mL), lithium salt LiN(H)Ph for **G3** / LiN(Me)Ph for **G4** was added at -40 °C with stirring. The reaction mixture was then slowly brought to room temperature and stirred for 6 h. It was filtered using a G4 frit containing celite. Removal of hexane from the filtrate gave an analytically pure sample of amidogermylene as a red pasty material.

**Data for compound G3:** Compound **G1** (2 g, 5.89 mmol), LiN(H)Ph (0.60 g, 6.0 mmol), Yield: 2.31 g, 99%. Anal. Calcd for C<sub>21</sub>H<sub>29</sub>GeN<sub>3</sub> (*M* = 396.12): C, 63.67; H, 7.38; N, 10.61. Found: C, 63.10; H, 7.90; N, 10.35. <sup>1</sup>H NMR (300 MHz, C<sub>6</sub>D<sub>6</sub>):  $\delta$  0.87 (d, <sup>3</sup>*J*<sub>HH</sub> = 6.9, 6H, CH(CH<sub>3</sub>)<sub>2</sub>), 0.96 (d, <sup>3</sup>*J*<sub>HH</sub> = 6.6, 6H, CH(CH<sub>3</sub>)<sub>2</sub>), 2.14–2.23 (m, 2H, CH(CH<sub>3</sub>)<sub>2</sub>), 3.18 (dd,

$^3J_{\text{HH}} = 13.5, 6.0, 2\text{H}, \text{CH}_2$ ), 3.29 (dd,  $^3J_{\text{HH}} = 13.5, 8.1, 2\text{H}, \text{CH}_2$ ), 4.24 (s, 1H, NH), 6.27 (t,  $^3J_{\text{HH}} = 8.4, 1\text{H}, \text{CH}_{\text{Ar}}$ ), 6.37 (d,  $^3J_{\text{HH}} = 11.4, 2\text{H}, \text{CH}_{\text{Ar}}$ ), 6.77-6.86 (m, 3H,  $\text{CH}_{\text{Ar}}$ ), 7.01 (d,  $^3J_{\text{HH}} = 7.5, 2\text{H}, \text{CH}_{\text{ring}}$ ), 7.30 (d,  $^3J_{\text{HH}} = 7.8 \text{ Hz}, 2\text{H}, \text{CH}_{\text{ring}}$ ).  $^{13}\text{C}\{^1\text{H}\}$  NMR (75 MHz,  $\text{C}_6\text{D}_6$ ):  $\delta$  20.89 ( $\text{CH}(\text{CH}_3)_2$ ), 20.96 ( $\text{CH}(\text{CH}_3)_2$ ), 27.65 ( $\text{CH}(\text{CH}_3)_2$ ), 53.80 ( $\text{CH}_2$ ), 113.82, 115.91, 116.18, 119.44, 129.29, 136.34, 152.53, 160.72.

**Data for compound G4:** Compound **G1** (2 g, 5.89 mmol), LiN(Me)Ph (0.68 g, 6.0 mmol), Yield: 2.44 g, 99%. Anal. Calcd for  $\text{C}_{22}\text{H}_{31}\text{GeN}_3$  ( $M = 410.14$ ): C, 64.43; H, 7.62; N, 10.25. Found: C, 64.05; H, 7.38; N, 10.52.  $^1\text{H}$  NMR (300 MHz,  $\text{C}_6\text{D}_6$ ):  $\delta$  0.83 (d,  $^3J_{\text{HH}} = 6.6, 6\text{H}, \text{CH}(\text{CH}_3)_2$ ), 0.92 (d,  $^3J_{\text{HH}} = 6.6, 6\text{H}, \text{CH}(\text{CH}_3)_2$ ), 2.08–2.21 (m, 2H,  $\text{CH}(\text{CH}_3)_2$ ), 2.90 (s, 3H, NCH<sub>3</sub>), 3.14 (dd,  $^3J_{\text{HH}} = 13.5, 6.0, 2\text{H}, \text{CH}_2$ ), 3.26 (dd,  $^3J_{\text{HH}} = 13.5, 7.8, 2\text{H}, \text{CH}_2$ ), 6.23 (t,  $^3J_{\text{HH}} = 9.3, 1\text{H}, \text{CH}_{\text{Ar}}$ ), 6.33 (d,  $^3J_{\text{HH}} = 11.4, 2\text{H}, \text{CH}_{\text{Ar}}$ ), 6.42 (d,  $^3J_{\text{HH}} = 7.8, 1\text{H}, \text{CH}_{\text{Ar}}$ ), 6.73–6.85 (m, 4H,  $\text{CH}_{\text{ring}}$ ), 6.98 (d,  $^3J_{\text{HH}} = 8.1 \text{ Hz}, 2\text{H}, \text{CH}_{\text{ring}}$ ).  $^{13}\text{C}\{^1\text{H}\}$  NMR (75 MHz,  $\text{C}_6\text{D}_6$ ):  $\delta$  20.79 ( $\text{CH}(\text{CH}_3)_2$ ), 20.92 ( $\text{CH}(\text{CH}_3)_2$ ), 27.61 ( $\text{CH}(\text{CH}_3)_2$ ), 53.78 ( $\text{CH}_2$ ), 113.80, 115.94, 116.21, 119.42, 129.25, 136.30, 152.44, 160.70.

**General synthetic route for germanium  $\mu$ -oxo dimers  $\{(i\text{-Bu})_2\text{ATIGe}(\text{Y})(\mu\text{-O})\}_2$  [ $\text{Y} = \text{Cl}$  (**D1**), OSiPh<sub>3</sub> (**D2**), N(H)Ph (**D3**), N(Me)Ph (**D4**), NC<sub>4</sub>H<sub>4</sub> (**D5**)].**

N<sub>2</sub>O gas was passed into the solution of germylene (**G1-G5**) in THF (30 mL) and the reaction mixture was heated at 60 °C for 2 h. Removal of THF from the reaction mixture afforded germanium  $\mu$ -oxo dimer (**D1-D5**) as a yellow solid. This solid was washed with hexane and dried *in vacuo* to result in an analytically pure sample of germanium  $\mu$ -oxo dimer (**D1-D5**).

**Synthesis of compound D1:** Compound **G1** (2 g, 5.89 mmol), Yield: 1.25 g, 60%. Mp: 122 °C. Anal. Calcd for  $\text{C}_{30}\text{H}_{46}\text{Cl}_2\text{Ge}_2\text{N}_4\text{O}_2$  ( $M = 710.90$ ): C, 50.69; H, 6.52; N, 7.88. Found: C, 50.39; H, 6.30; N, 7.50.  $^1\text{H}$  NMR (300 MHz,  $\text{CDCl}_3$ ):  $\delta$  0.99 (d,  $^3J_{\text{HH}} = 6.0 \text{ Hz}, 24\text{H}, \text{CH}(\text{CH}_3)_2$ ), 2.31-2.45 (m, 4H,  $\text{CH}(\text{CH}_3)_2$ ), 3.87 (d,  $^3J_{\text{HH}} = 7.8 \text{ Hz}, 8\text{H}, \text{CH}_2$ ), 7.06 (t,  $^3J_{\text{HH}} =$

9.0 Hz, 2H, CH), 7.24 (d,  $^3J_{\text{HH}} = 11.7$  Hz, 4H, CH), 7.57 (t,  $^3J_{\text{HH}} = 10.2$  Hz, 4H, CH).  $^{13}\text{C}\{^1\text{H}\}$  NMR (75 MHz,  $\text{CDCl}_3$ ):  $\delta$  20.85 ( $\text{CH}(\text{CH}_3)_2$ ), 27.48 ( $\text{CH}(\text{CH}_3)_2$ ), 53.26 ( $\text{CH}_2$ ), 118.22 ( $\text{C}_4$ ), 126.90 ( $\text{C}_{2,6}$ ), 138.67 ( $\text{C}_{3,5}$ ), 155.08 ( $\text{C}_{1,7}$ ).

**Synthesis of compound D2:** Compound **G2** (1 g, 1.72 mmol), Yield: 1.02 g, 99%. Mp: 104 °C. The data for this compound matches with the literature report.<sup>S2</sup>

**Synthesis of compound D3:** Compound **G3** (1.5 g, 3.78 mmol), Yield: 1.54 g, 99%. Mp: 109 °C. Anal. Calcd for  $\text{C}_{42}\text{H}_{58}\text{Ge}_2\text{N}_6\text{O}_2$  ( $M = 824.23$ ): C, 61.20; H, 7.09; N, 10.20. Found: C, 60.95; H, 6.90; N, 10.35.  $^1\text{H}$  NMR (300 MHz,  $\text{C}_6\text{D}_6$ ):  $\delta$  0.87 (d, 12H,  $^3J_{\text{HH}} = 6.0$  Hz,  $\text{CH}(\text{CH}_3)_2$ ), 0.96 (d, 12H,  $^3J_{\text{HH}} = 6.0$  Hz,  $\text{CH}(\text{CH}_3)_2$ ), 2.14–2.23 (m, 4H,  $\text{CH}(\text{CH}_3)_2$ ), 3.15–3.21 (dd, 4H,  $^3J_{\text{HH}} = 12.0$ , 6.3 Hz,  $\text{CH}_2$ ), 3.26–3.33 (dd,  $^3J_{\text{HH}} = 12.0$ , 6.3 Hz, 4H,  $\text{CH}_2$ ), 4.24 (s, 2H, NH), 6.27 (t, 2H,  $^3J_{\text{HH}} = 9.3$  Hz,  $\text{CH}_{\text{Ar}}$ ), 6.37 (d, 4H,  $^3J_{\text{HH}} = 10.4$  Hz,  $\text{CH}_{\text{Ar}}$ ), 6.46 (t, 2H,  $^3J_{\text{HH}} = 7.5$  Hz,  $\text{CH}_{\text{Ar}}$ ), 6.77–6.86 (m, 4H,  $\text{CH}_{\text{ring}}$ ), 7.01 (d, 4H,  $^3J_{\text{HH}} = 7.5$  Hz,  $\text{CH}_{\text{Ar}}$ ), 7.17 (t,  $^3J_{\text{HH}} = 8.1$  Hz, 2H,  $\text{CH}_{\text{ring}}$ ), 7.25 (t, 4H,  $^3J_{\text{HH}} = 7.9$  Hz,  $\text{CH}_{\text{ring}}$ ).  $^{13}\text{C}\{^1\text{H}\}$  NMR (75 MHz,  $\text{CDCl}_3$ ):  $\delta$  21.15 ( $\text{CH}(\text{CH}_3)_2$ ), 21.21 ( $\text{CH}(\text{CH}_3)_2$ ), 21.26 ( $\text{CH}(\text{CH}_3)_2$ ), 27.38 ( $\text{CH}(\text{CH}_3)_2$ ), 27.75 ( $\text{CH}(\text{CH}_3)_2$ ), 52.88 ( $\text{CH}_2$ ), 53.20 ( $\text{CH}_2$ ), 114.68, 114.77, 116.72, 117.15, 118.04, 119.03, 121.07, 121.17, 128.39, 136.34, 149.21, 155.17.

**Synthesis of compound D4:** Compound **G4** (1.2 g, 2.92 mmol), Yield: 1.23 g, 99%. Mp: 113 °C. Anal. Calcd for  $\text{C}_{44}\text{H}_{62}\text{Ge}_2\text{N}_6\text{O}_2$  ( $M = 852.28$ ): C, 62.01; H, 7.33; N, 9.86. Found: C, 62.23; H, 7.19; N, 9.75.  $^1\text{H}$  NMR (300 MHz,  $\text{CDCl}_3$ ):  $\delta$  0.88 (d,  $^3J_{\text{HH}} = 6.9$  Hz, 24H,  $\text{CH}(\text{CH}_3)_2$ ), 2.18–2.29 (m, 4H,  $\text{CH}(\text{CH}_3)_2$ ), 2.69 (s, 6H,  $\text{CH}_3$ ), 3.33 (dd,  $^3J_{\text{HH}} = 13.2$ , 6.9 Hz, 4H,  $\text{CH}_2$ ), 3.79 (dd,  $^3J_{\text{HH}} = 13.2$ , 7.5 Hz, 4H,  $\text{CH}_2$ ), 6.48–6.55 (m, 2H,  $\text{CH}_{\text{Ar}}$ ), 6.61 (t,  $^3J_{\text{HH}} = 9.3$  Hz, 2H,  $\text{CH}_{\text{Ar}}$ ), 6.76–6.84 (m, 12H,  $\text{CH}_{\text{ring}}$ ), 7.17–7.28 (m, 4H,  $\text{CH}_{\text{ring}}$ ).  $^{13}\text{C}\{^1\text{H}\}$  NMR (75 MHz,  $\text{CDCl}_3$ ):  $\delta$  21.20 ( $\text{CH}(\text{CH}_3)_2$ ), 27.71 ( $\text{CH}(\text{CH}_3)_2$ ), 35.23 ( $\text{CH}_3$ ), 53.93 ( $\text{CH}_2$ ), 114.35, 117.13, 118.46, 120.64, 127.72, 135.99, 153.16, 154.99.

**Synthesis of compound D5:** Compound **G5** (2 g, 5.40 mmol), Yield: 2.04 g, 98%. Mp: 107 °C. Anal. Calcd for C<sub>38</sub>H<sub>54</sub>Ge<sub>2</sub>N<sub>6</sub>O<sub>2</sub> (*M* = 772.15): C, 59.11; H, 7.05; N, 10.88. Found: C, 58.80; H, 6.80; N, 10.70. <sup>1</sup>H NMR (300 MHz, CDCl<sub>3</sub>): δ 0.76 (d, <sup>3</sup>*J*<sub>HH</sub> = 6.6 Hz, 12H, CH(CH<sub>3</sub>)<sub>2</sub>), 0.89 (d, <sup>3</sup>*J*<sub>HH</sub> = 4.2 Hz, 12H, CH(CH<sub>3</sub>)<sub>2</sub>), 2.23–2.35 (m, 4H, CH(CH<sub>3</sub>)<sub>2</sub>), 3.69 (dd, <sup>3</sup>*J*<sub>HH</sub> = 13.5, 7.5 Hz, 4H, CH<sub>2</sub>), 3.83 (dd, <sup>3</sup>*J*<sub>HH</sub> = 14.1, 8.1 Hz, 4H, CH<sub>2</sub>), 6.11 (s, 4H, CH<sub>pyrrole</sub>), 6.69 (s, 4H, CH<sub>pyrrole</sub>), 6.74 (t, <sup>3</sup>*J*<sub>HH</sub> = 9.6 Hz, 2H, CH<sub>ring</sub>), 6.95–7.04 (m, 4H, CH<sub>ring</sub>), 7.34 (t, <sup>3</sup>*J*<sub>HH</sub> = 10.5 Hz, 4H, CH<sub>ring</sub>). <sup>13</sup>C{<sup>1</sup>H} NMR (75 MHz, CDCl<sub>3</sub>): δ 20.65 (CH(CH<sub>3</sub>)<sub>2</sub>), 21.06 (CH(CH<sub>3</sub>)<sub>2</sub>), 27.41 (CH(CH<sub>3</sub>)<sub>2</sub>), 53.43 (CH<sub>2</sub>), 108.40 (pyrrole), 115.60, 122.54 (pyrrole), 123.95, 137.02, 155.28.

**General route for the synthesis of donor-acceptor stabilized germaacid chloride (*i*-Bu)<sub>2</sub>ATIGe(O)(Cl)→B(C<sub>6</sub>F<sub>5</sub>)<sub>3</sub> (**1**), germaester (*i*-Bu)<sub>2</sub>ATIGe(O)(OSiPh<sub>3</sub>)→B(C<sub>6</sub>F<sub>5</sub>)<sub>3</sub> (**2**), and *N*-germaacyl pyrrole (*i*-Bu)<sub>2</sub>ATIGe(O)(NC<sub>4</sub>H<sub>4</sub>)→B(C<sub>6</sub>F<sub>5</sub>)<sub>3</sub> (**3**).**

A solution of B(C<sub>6</sub>F<sub>5</sub>)<sub>3</sub> in toluene (5 mL) was transferred to a solution of germanium  $\mu$ -oxo dimer (**D1**, **D2**, and **D5**) in toluene (30 mL) at room temperature, stirred for 2 h, and the solvent was removed under vacuum to afford an analytically pure sample of the desired germanium compound (**1**, **2**, and **3**, respectively). Single crystals of these compounds (**1**, **2**, and **3**) suitable for X-ray diffraction studies were grown by cooling their saturated solutions in dichloromethane at -40 °C.

**Synthesis of compound 1:** Compound **D1** (1.0 g, 1.40 mmol) and B(C<sub>6</sub>F<sub>5</sub>)<sub>3</sub> (1.44 g, 2.80 mmol). Yield: 2.41 g, 99%. Mp: 131 °C. Anal. Calcd for C<sub>33</sub>H<sub>23</sub>BClF<sub>15</sub>GeN<sub>2</sub>O (*M* = 867.43): C, 45.69; H, 2.67; N, 3.23 Found: C, 45.52; H, 2.55; N, 3.35. <sup>1</sup>H NMR (300 MHz, CDCl<sub>3</sub>): δ 0.94 (d, <sup>3</sup>*J*<sub>HH</sub> = 6.8 Hz, 6H, CH(CH<sub>3</sub>)<sub>2</sub>), 0.97 (d, <sup>3</sup>*J*<sub>HH</sub> = 6.4 Hz, 6H, CH(CH<sub>3</sub>)<sub>2</sub>), 2.17–2.27 (m, 2H, CH(CH<sub>3</sub>)<sub>2</sub>), 3.48–3.59 (m, 2H, CH<sub>2</sub>), 7.36–7.45 (m, 3H, CH), 7.80 (t, <sup>3</sup>*J*<sub>HH</sub> = 12.0 Hz, 2H, CH). <sup>13</sup>C{<sup>1</sup>H} NMR (75 MHz, CDCl<sub>3</sub>): δ 20.37 (CH(CH<sub>3</sub>)<sub>2</sub>), 20.59 (CH(CH<sub>3</sub>)<sub>2</sub>), 27.59

(CH(CH<sub>3</sub>)<sub>2</sub>), 53.45 (CH<sub>2</sub>), 120.36 (C<sub>4</sub>), 131.23 (C<sub>2,6</sub>), 135.53 (CF), 138.00 (CF), 140.54 (C<sub>3,5</sub>), 146.68 (CF), 149.11 (CF), 155.78 (C<sub>1,7</sub>). <sup>19</sup>F{<sup>1</sup>H} NMR (282 MHz, C<sub>6</sub>D<sub>6</sub>): δ -133.14 (dd, <sup>3</sup>J<sub>FF</sub> = 23.2, 6.9 Hz, 6F, *ortho*-C<sub>6</sub>F<sub>5</sub>), -159.45 (t, <sup>3</sup>J<sub>FF</sub> = 20.6 Hz, 3F, *para*-C<sub>6</sub>F<sub>5</sub>), -164.74 (m, 6F, *meta*-C<sub>6</sub>F<sub>5</sub>). <sup>11</sup>B{<sup>1</sup>H} NMR (128 MHz, CDCl<sub>3</sub>): δ -2.46 (s).

**Synthesis of compound 2:** Compound **D2** (1.0 g, 0.84 mmol) and B(C<sub>6</sub>F<sub>5</sub>)<sub>3</sub> (0.86 g, 1.68 mmol). Yield: 1.84 g, 99%. Mp: 125 °C. Anal. Calcd for C<sub>51</sub>H<sub>38</sub>BF<sub>15</sub>GeN<sub>2</sub>O<sub>2</sub>Si (M = 1107.37): C, 55.32; H, 3.46; N, 2.53 Found: C, 55.56; H, 3.25; N, 2.23. <sup>1</sup>H NMR (300 MHz, CDCl<sub>3</sub>): δ 0.62 (d, <sup>3</sup>J<sub>HH</sub> = 7.2 Hz, 6H, CH(CH<sub>3</sub>)<sub>2</sub>), 0.65 (d, <sup>3</sup>J<sub>HH</sub> = 6.0 Hz, 6H, CH(CH<sub>3</sub>)<sub>2</sub>), 1.89-1.95 (m, 2H, CH(CH<sub>3</sub>)<sub>2</sub>), 3.11 (dd, <sup>3</sup>J<sub>HH</sub> = 16.0, 8.0 Hz, 2H, CH<sub>2</sub>), 3.26 (dd, <sup>3</sup>J<sub>HH</sub> = 16.0, 8.0 Hz, 2H, CH<sub>2</sub>), 7.09 (d, <sup>3</sup>J<sub>HH</sub> = 12.0, 2H, CH), 7.28 (t, <sup>3</sup>J<sub>HH</sub> = 6.8 Hz, 5H, CH), 7.38 (t, <sup>3</sup>J<sub>HH</sub> = 8.0 Hz, 2H, CH), 7.52 (d, <sup>3</sup>J<sub>HH</sub> = 6.8 Hz, 4H, CH), 7.62 (t, <sup>3</sup>J<sub>HH</sub> = 10.4 Hz, 2H, CH). <sup>13</sup>C{<sup>1</sup>H} NMR (75 MHz, CDCl<sub>3</sub>): δ 19.79 (CH(CH<sub>3</sub>)<sub>2</sub>), 20.10 (CH(CH<sub>3</sub>)<sub>2</sub>), 27.75 (CH(CH<sub>3</sub>)<sub>2</sub>), 52.70 (CH<sub>2</sub>), 119.41 (C<sub>4</sub>), 127.79 (C<sub>2,6</sub>), 130.25 (C<sub>Ar</sub>), 134.34 (C<sub>Ar</sub>), 135.13 (C<sub>Ar</sub>), 136.02 (C<sub>3,5</sub>), 137.86 (CF), 139.60 (CF), 146.89 (CF), 150.57 (CF), 155.30 (C<sub>1,7</sub>). <sup>19</sup>F{<sup>1</sup>H} NMR (282 MHz, CDCl<sub>3</sub>): δ -132.31 (d, <sup>3</sup>J<sub>FF</sub> = 16.92 Hz, 6F, *ortho*-C<sub>6</sub>F<sub>5</sub>), -159.75 (t, <sup>3</sup>J<sub>FF</sub> = 20.70 Hz, 3F, *para*-C<sub>6</sub>F<sub>5</sub>), -165.05 (d, 6F, <sup>3</sup>J<sub>FF</sub> = 24.27 Hz, *meta*-C<sub>6</sub>F<sub>5</sub>). <sup>11</sup>B{<sup>1</sup>H} NMR (128 MHz, CDCl<sub>3</sub>): δ -2.61 (s). <sup>29</sup>Si{<sup>1</sup>H} NMR (79 MHz, CDCl<sub>3</sub>): δ -13.62 (s).

**Synthesis of compound 3:** Compound **D5** (2.0 g, 2.59 mmol) and B(C<sub>6</sub>F<sub>5</sub>)<sub>3</sub> (2.65 g, 5.18 mmol). Yield: 4.60 g, 99%. Mp: 129 °C. Anal. Calcd for C<sub>37</sub>H<sub>27</sub>BF<sub>15</sub>GeN<sub>3</sub>O (M = 898.06): C, 49.48; H, 3.03; N, 4.68 Found: C, 49.29; H, 3.31; N, 3.36. <sup>1</sup>H NMR (300 MHz, CDCl<sub>3</sub>): δ 0.76 (d, <sup>3</sup>J<sub>HH</sub> = 6.4 Hz, 6H, CH(CH<sub>3</sub>)<sub>2</sub>), 0.81 (d, <sup>3</sup>J<sub>HH</sub> = 8.0 Hz, 6H, CH(CH<sub>3</sub>)<sub>2</sub>), 1.73-1.83 (m, 2H, CH(CH<sub>3</sub>)<sub>2</sub>), 3.36-3.47 (m, 4H, CH<sub>2</sub>), 6.43 (s, 2H, Py), 6.98 (s, 2H, Py), 7.36 (d, <sup>3</sup>J<sub>HH</sub> = 11.6 Hz, 2H, CH), 7.42 (t, <sup>3</sup>J<sub>HH</sub> = 9.2 Hz, 1H, CH), 7.80 (t, <sup>3</sup>J<sub>HH</sub> = 10.0 Hz, 2H, CH). <sup>13</sup>C{<sup>1</sup>H} NMR (75 MHz, C<sub>6</sub>D<sub>6</sub>): δ 20.33 (CH(CH<sub>3</sub>)<sub>2</sub>), 20.41 (CH(CH<sub>3</sub>)<sub>2</sub>), 29.16 (CH(CH<sub>3</sub>)<sub>2</sub>), 54.48

(CH<sub>2</sub>), 113.68 (Py), 119.90 (C<sub>4</sub>), 124.30 (Py), 130.84 (C<sub>2,6</sub>), 135.97 (CF), 139.27 (CF), 140.31 (C<sub>3,5</sub>), 147.22 (CF), 150.40 (CF), 156.25 (C<sub>1,7</sub>). <sup>19</sup>F{<sup>1</sup>H} NMR (282 MHz, CDCl<sub>3</sub>): δ -133.09 (dd, <sup>3</sup>J<sub>FF</sub> = 25.66, 24.53 Hz, 6F, *ortho*-C<sub>6</sub>F<sub>5</sub>), -159.77 (t, <sup>3</sup>J<sub>FF</sub> = 20.30 Hz, 3F, *para*-C<sub>6</sub>F<sub>5</sub>), -164.83 (m, 6F, *meta*-C<sub>6</sub>F<sub>5</sub>). <sup>11</sup>B{<sup>1</sup>H} NMR (128 MHz, CDCl<sub>3</sub>): δ -2.72 (s).

**General synthetic route for the isolation of donor-acceptor stabilized germaynone (*i*-Bu)<sub>2</sub>ATiGe(O)(CCPh)→B(C<sub>6</sub>F<sub>5</sub>)<sub>3</sub> (4), germaester (*i*-Bu)<sub>2</sub>ATiGe(O)(O*t*-Bu)→B(C<sub>6</sub>F<sub>5</sub>)<sub>3</sub> (5), and germamine (*i*-Bu)<sub>2</sub>ATiGe=N(SiMe<sub>3</sub>)(OSiMe<sub>3</sub>)→B(C<sub>6</sub>F<sub>5</sub>)<sub>3</sub> (9).**

A solution of germaacid chloride **1** in toluene (10 mL) was transferred to a suspension/solution of lithium/potassium salt [lithium phenylacetylide (for compound **4**), potassium *t*-butoxide (for compound **5**), and lithium bis-trimethylsilyl amide (for compound **9**)] in toluene (10 mL) at 0 °C. The reaction mixture was then stirred for overnight at room temperature and filtered through a G4 frit containing celite. Removal of the solvent from the filtrate gave an analytically pure sample of the germanium compound [germaynone [(*i*-Bu)<sub>2</sub>ATiGe(O)(CCPh)→B(C<sub>6</sub>F<sub>5</sub>)<sub>3</sub>] (**4**), germaester [(*i*-Bu)<sub>2</sub>ATiGe(O)(O*t*-Bu)→B(C<sub>6</sub>F<sub>5</sub>)<sub>3</sub>] (**5**), and germamine [(*i*-Bu)<sub>2</sub>ATiGe=N(SiMe<sub>3</sub>)(OSiMe<sub>3</sub>)→B(C<sub>6</sub>F<sub>5</sub>)<sub>3</sub>] (**9**)]. Single crystals of these compounds suitable for X-ray diffraction studies were grown from their saturated solutions in dichloromethane at -40 °C.

**General synthetic route for the isolation of donor-acceptor stabilized germaketones (*i*-Bu)<sub>2</sub>ATiGe(O)(X)→B(C<sub>6</sub>F<sub>5</sub>)<sub>3</sub> [X = Ph (**6**), X = Me (**7**)].**

A solution of germaacid chloride **1** in toluene (20 mL) was treated with the lithium salt [phenyl lithium (1.9 M in dibutylether) (for compound **6**) and methyl lithium (1.6 M in diethyl ether) (for compound **7**)] at 0 °C. The reaction mixture was then stirred for overnight at room temperature and filtered through a G4 frit containing celite. Removal of the solvent from the filtrate gave an analytically pure sample of germaketone {[(*i*-



$(\text{Bu})_2\text{ATiGe}(\text{O})(\text{Ph})\rightarrow\text{B}(\text{C}_6\text{F}_5)_3]$  (**6**) and  $[(i\text{-Bu})_2\text{ATiGe}(\text{O})(\text{Me})\rightarrow\text{B}(\text{C}_6\text{F}_5)_3]$  (**7**)}. Single crystals of these compounds suitable for X-ray diffraction studies were grown from their saturated solutions in dichloromethane at  $-40\text{ }^\circ\text{C}$ .

**Synthesis of compound 4:** Compound **1** (0.5 g, 0.58 mmol), LiCCPh (68 mg, 0.63 mmol). Yield: 0.48 g, 90%. Mp:  $141\text{ }^\circ\text{C}$ . Anal. Calcd for  $\text{C}_{41}\text{H}_{28}\text{BF}_{15}\text{GeN}_2\text{O}$  ( $M = 933.10$ ): C, 52.77; H, 3.02; N, 3.00 Found: C, 52.29; H, 3.15; N, 3.11.  $^1\text{H}$  NMR (300 MHz,  $\text{CDCl}_3$ ):  $\delta$  1.06-1.10 (q, 12H,  $\text{CH}(\text{CH}_3)_2$ ), 2.40-2.49 (m, 2H,  $\text{CH}(\text{CH}_3)_2$ ), 3.53 (dd,  $^3J_{\text{HH}} = 15.3, 9.0$  Hz, 2H,  $\text{CH}_2$ ), 3.76 (dd,  $^3J_{\text{HH}} = 14.1, 7.8$  Hz, 2H,  $\text{CH}_2$ ), 6.87 (t,  $^3J_{\text{HH}} = 9.3$ , 1H, CH), 6.99 (s,  $^3J_{\text{HH}} = 11.4$ , 2H, CH), 7.25-7.33 (m, 3H, CH), 7.37-7.44 (m, 4H, CH).  $^{13}\text{C}\{^1\text{H}\}$  NMR (75 MHz,  $\text{CDCl}_3$ ):  $\delta$  20.43 ( $\text{CH}(\text{CH}_3)_2$ ), 20.59 ( $\text{CH}(\text{CH}_3)_2$ ), 27.37 ( $\text{CH}(\text{CH}_3)_2$ ), 53.21 ( $\text{CH}_2$ ), 109.11, 118.70, 120.14( $\text{C}_4$ ), 125.30, 128.25, 128.58, 129.04, 131.81 ( $\text{C}_{2,6}$ ), 135.11 (CF), 138.55 (CF), 139.69 ( $\text{C}_{3,5}$ ), 146.57 (CF), 149.66 (CF), 157.40 ( $\text{C}_{1,7}$ ).  $^{19}\text{F}\{^1\text{H}\}$  NMR (282 MHz,  $\text{CDCl}_3$ ):  $\delta$  -133.62 (d,  $^3J_{\text{FF}} = 24.81$  Hz, 6F, *ortho*- $\text{C}_6\text{F}_5$ ), -160.74 (t,  $^3J_{\text{FF}} = 20.30$  Hz, 3F, *para*- $\text{C}_6\text{F}_5$ ), -165.39 (m, 6F, *meta*- $\text{C}_6\text{F}_5$ ).  $^{11}\text{B}\{^1\text{H}\}$  NMR (128 MHz,  $\text{CDCl}_3$ ):  $\delta$  -2.79 (s).

**Synthesis of compound 5** Compound **1** (0.5 g, 0.58 mmol), KO*t*-Bu (65 mg, 0.59 mmol). Yield: 0.42 g, 81%. Mp:  $147\text{ }^\circ\text{C}$ . Anal. Calcd for  $\text{C}_{37}\text{H}_{32}\text{BF}_{15}\text{GeN}_2\text{O}_2$  ( $M = 905.09$ ): C, 49.10; H, 3.56; N, 3.10 Found: C, 49.27; H, 3.39; N, 3.25.  $^1\text{H}$  NMR (400 MHz,  $\text{CDCl}_3$ ):  $\delta$  1.05 (d,  $^3J_{\text{HH}} = 6.0$  Hz, 12H,  $\text{CH}(\text{CH}_3)_2$ ), 1.51 (s, 9H,  $\text{C}(\text{CH}_3)_3$ ), 2.34-2.40 (m, 2H,  $\text{CH}(\text{CH}_3)_2$ ), 3.54 (dd,  $^3J_{\text{HH}} = 14.4, 6.8$  Hz, 2H,  $\text{CH}_2$ ), 3.67 (dd,  $^3J_{\text{HH}} = 14.0, 7.6$  Hz, 2H,  $\text{CH}_2$ ), 6.88 (t,  $^3J_{\text{HH}} = 9.2$  Hz, 1H, CH), 6.97 (d,  $^3J_{\text{HH}} = 11.2$  Hz, 2H, CH), 7.39 (t,  $^3J_{\text{HH}} = 10.4$  Hz, 2H, CH).  $^{13}\text{C}\{^1\text{H}\}$  NMR (75 MHz,  $\text{CDCl}_3$ ):  $\delta$  20.79 ( $\text{CH}(\text{CH}_3)_2$ ), 20.82 ( $\text{CH}(\text{CH}_3)_2$ ), 27.33 ( $\text{CH}(\text{CH}_3)_2$ ), 32.23 ( $\text{C}(\text{CH}_3)_3$ ), 52.56 ( $\text{CH}_2$ ), 118.34 ( $\text{C}_4$ ), 128.21 ( $\text{C}_{2,6}$ ), 129.02, 134.85 (CF), 138.14 (CF), 139.28 ( $\text{C}_{3,5}$ ), 146.04 (CF), 149.29 (CF), 155.59 ( $\text{C}_{1,7}$ ).  $^{19}\text{F}\{^1\text{H}\}$  NMR (376 MHz,  $\text{CDCl}_3$ ):  $\delta$  -132.30

(d,  $^3J_{\text{FF}} = 22.18$  Hz, 6F, *ortho*-C<sub>6</sub>F<sub>5</sub>), -159.73 (t,  $^3J_{\text{FF}} = 21.80$  Hz, 3F, *para*-C<sub>6</sub>F<sub>5</sub>), -165.04 (t,  $^3J_{\text{FF}} = 19.55$  Hz, 6F, *meta*-C<sub>6</sub>F<sub>5</sub>).  $^{11}\text{B}\{^1\text{H}\}$  NMR (128 MHz, CDCl<sub>3</sub>):  $\delta$  -2.44 (s).

**Synthesis of compound 6:** Compound 1 (0.5 g, 0.58 mmol), PhLi (0.3 mL, 1.9 M in dibutylether). Yield: 0.45 g, 87%. Mp: 131 °C. Anal. Calcd for C<sub>39</sub>H<sub>28</sub>BF<sub>15</sub>GeN<sub>2</sub>O (M = 909.08): C, 51.53; H, 3.10; N, 3.08 Found: C, 51.40; H, 3.19; N, 2.89.  $^1\text{H}$  NMR (300 MHz, CDCl<sub>3</sub>):  $\delta$  0.70 (d,  $^3J_{\text{HH}} = 7.5$  Hz, 6H, CH(CH<sub>3</sub>)<sub>2</sub>), 0.81 (d,  $^3J_{\text{HH}} = 6.3$  Hz, 6H, CH(CH<sub>3</sub>)<sub>2</sub>), 1.78-1.91 (m, 2H, CH(CH<sub>3</sub>)<sub>2</sub>), 3.34-3.45 (m, 4H, CH<sub>2</sub>), 7.18 (d,  $^3J_{\text{HH}} = 11.1$  Hz, 2H, CH), 7.25 (t,  $^3J_{\text{HH}} = 5.7$  Hz, 1H, CH), 7.52-7.67 (m, 4H, CH), 7.86 (d,  $^3J_{\text{HH}} = 5.4$  Hz, 2H, CH).  $^{13}\text{C}\{^1\text{H}\}$  NMR (75 MHz, CDCl<sub>3</sub>):  $\delta$  20.38 (CH(CH<sub>3</sub>)<sub>2</sub>), 20.53 (CH(CH<sub>3</sub>)<sub>2</sub>), 28.27 (CH(CH<sub>3</sub>)<sub>2</sub>), 53.64 (CH<sub>2</sub>), 118.73 (C<sub>4</sub>), 128.37, 129.17 (C<sub>2,6</sub>), 133.01, 134.82 (CF), 135.18, 138.08 (CF), 139.46 (C<sub>3,5</sub>), 146.13 (CF), 149.39 (CF), 157.65 (C<sub>1,7</sub>).  $^{19}\text{F}\{^1\text{H}\}$  NMR (282 MHz, CDCl<sub>3</sub>):  $\delta$  -133.65 (d,  $^3J_{\text{FF}} = 24.25$  Hz, 6F, *ortho*-C<sub>6</sub>F<sub>5</sub>), -160.67 (t,  $^3J_{\text{FF}} = 21.15$  Hz, 3F, *para*-C<sub>6</sub>F<sub>5</sub>), -165.26 (m, 6F, *meta*-C<sub>6</sub>F<sub>5</sub>).  $^{11}\text{B}\{^1\text{H}\}$  NMR (128 MHz, CDCl<sub>3</sub>):  $\delta$  -3.12 (s).

**Synthesis of compound 7:** Compound 1 (0.3 g, 0.35 mmol), MeLi (0.21 mL, 1.6 M in diethyl ether). Yield: 0.27 g, 92%. Mp: 126 °C. Anal. Calcd for C<sub>34</sub>H<sub>26</sub>BF<sub>15</sub>GeN<sub>2</sub>O (M = 847.01): C, 48.21; H, 3.09; N, 3.31 Found: C, 48.05; H, 2.96; N, 3.09.  $^1\text{H}$  NMR (400 MHz, CDCl<sub>3</sub>):  $\delta$  0.92 (d,  $^3J_{\text{HH}} = 6.0$  Hz, 6H, CH(CH<sub>3</sub>)<sub>2</sub>), 0.98 (d,  $^3J_{\text{HH}} = 6.4$  Hz, 6H, CH(CH<sub>3</sub>)<sub>2</sub>), 0.98 (d,  $^3J_{\text{HH}} = 6.4$  Hz, 6H, CH(CH<sub>3</sub>)<sub>2</sub>), 1.25 (s, 3H, CH<sub>3</sub>), 2.07-2.11 (m, 2H, CH(CH<sub>3</sub>)<sub>2</sub>), 3.35 (dd,  $^3J_{\text{HH}} = 23.2, 14.0$  Hz, 2H, CH<sub>2</sub>), 3.48 (dd,  $^3J_{\text{HH}} = 14.1, 5.2$  Hz, 2H, CH<sub>2</sub>), 7.06 (d,  $^3J_{\text{HH}} = 10.2$ , 2H, CH), 7.20 (t,  $^3J_{\text{HH}} = 9.6$  Hz, 1H, CH), 7.57 (t,  $^3J_{\text{HH}} = 9.6$  Hz, 2H, CH).  $^{13}\text{C}\{^1\text{H}\}$  NMR (75 MHz, CDCl<sub>3</sub>):  $\delta$  20.37 (CH(CH<sub>3</sub>)<sub>2</sub>), 20.65 (CH(CH<sub>3</sub>)<sub>2</sub>), 27.07 (CH(CH<sub>3</sub>)<sub>2</sub>), 53.23 (CH<sub>2</sub>), 118.66 (C<sub>4</sub>), 128.77 (C<sub>2,6</sub>), 134.73 (CF), 138.17 (CF), 139.31 (C<sub>3,5</sub>), 146.04 (CF), 149.18 (CF), 157.35 (C<sub>1,7</sub>).  $^{19}\text{F}\{^1\text{H}\}$  NMR (282 MHz, CDCl<sub>3</sub>):  $\delta$  -134.29 (d,  $^3J_{\text{FF}} = 19.74$  Hz,

6F, *ortho*-C<sub>6</sub>F<sub>5</sub>), -160.83 (t, <sup>3</sup>J<sub>FF</sub> = 20.30 Hz, 3F, *para*-C<sub>6</sub>F<sub>5</sub>), -165.33 (m, 6F, *meta*-C<sub>6</sub>F<sub>5</sub>).  
<sup>11</sup>B{<sup>1</sup>H} NMR (128 MHz, CDCl<sub>3</sub>): δ -3.31 (s).

**Synthesis of compound 9:** Compound **1** (0.2 g, 0.23 mmol), LiN(TMS)<sub>2</sub> (39 mg, 0.24 mmol). Yield: 0.22 g, 96%. Mp: 118 °C. Anal. Calcd for C<sub>39</sub>H<sub>41</sub>BF<sub>15</sub>GeN<sub>3</sub>OSi<sub>2</sub> (M = 992.36): C, 47.20; H, 4.16; N, 4.23 Found: C, 47.31; H, 3.98; N, 4.06. <sup>1</sup>H NMR (300 MHz, C<sub>6</sub>D<sub>6</sub>): δ 0.38 (s, 9H, Si(CH<sub>3</sub>)<sub>3</sub>), 0.49 (s, 9H, Si(CH<sub>3</sub>)<sub>3</sub>), 0.90-0.93 (q, 12H, CH(CH<sub>3</sub>)<sub>2</sub>), 2.19-2.32 (m, 2H, CH(CH<sub>3</sub>)<sub>2</sub>), 3.27 (dd, <sup>3</sup>J<sub>HH</sub> = 13.2, 6.0 Hz, 2H, CH<sub>2</sub>), 3.46 (dd, <sup>3</sup>J<sub>HH</sub> = 13.8, 7.8 Hz, 2H, CH<sub>2</sub>), 6.21 (t, <sup>3</sup>J<sub>HH</sub> = 8.4 Hz, 1H, CH), 6.40 (t, <sup>3</sup>J<sub>HH</sub> = 11.1 Hz, 2H, CH), 6.68 (t, <sup>3</sup>J<sub>HH</sub> = 9.9 Hz, 2H, CH).

### Synthesis of compounds **2** and **3** from compound **1**.

A solution of germaacid chloride **1** (0.3 g, 0.34 mmol) in toluene (10 mL) was transferred to a solution of the lithium salt [lithium triphenylsiloxide (97 mg, 0.34 mmol) (for compound **2**) and lithium pyrrol-1-ide (26 mg, 0.34 mmol) (for compound **3**)] in toluene (10 mL) at 0 °C. The reaction mixture was then brought to room temperature and stirred overnight. It was filtered using a G4 frit containing celite. Removal of solvent from the filtrate gave a yellow solid, which was washed with hexane (2 mL) and dried in *vacuo* to get a pure sample of the germanium compound [**2** (0.320 mg, 84%) and **3** (0.282 mg, 91%)].

### Conversion of compound **2/5** to compound **1**.

To a toluene solution (20 mL) of compound **2** (0.3 g, 0.35 mmol), TMSCl (46 μL, 0.36 mmol) was added at 0 °C. The reaction mixture was stirred for 2 h at room temperature and all the volatiles were removed under reduced pressure. The resultant solid was washed with hexane and finally dried *in vacuo* to get an analytically pure sample of compound **1** in 86% yield (Note: Using the same procedure and starting from compound **5** instead of **2**, compound **1** can be isolated).

## Synthesis of compound 10.

To a toluene (10 mL) solution of compound **3** (0.5 g, 0.56 mmol), thiophenol (57  $\mu$ L, 0.56 mmol) was added at room temperature. The resulting solution was then stirred for 6 h, and the solvent was removed under reduced pressure to get an analytically pure sample of compound **10**. Single crystals of compound **10** suitable for X-ray diffraction studies were grown from its toluene solution at -40 °C. Yield: 0.52 g, 99%. Mp: 135 °C. Anal. Calcd for  $C_{39}H_{28}BF_{15}GeN_2OS$  (M = 941.14): C, 49.77; H, 3.00; N, 2.98. Found: C, 50.02; H, 2.67; N, 3.51.  $^1H$  NMR (300 MHz,  $CDCl_3$ ):  $\delta$  0.74 (d,  $^3J_{HH} = 6.6$  Hz, 6H,  $CH(CH_3)_2$ ), 0.93 (d,  $^3J_{HH} = 6.6$  Hz, 6H,  $CH(CH_3)_2$ ), 2.04-2.13 (m, 2H,  $CH(CH_3)_2$ ), 3.41 (dd,  $^3J_{HH} = 14.1, 6.6$  Hz, 2H,  $CH_2$ ), 3.55 (dd,  $^3J_{HH} = 14.1, 8.4$  Hz, 2H,  $CH_2$ ), 6.95-7.03 (m, 5H,  $CH$ ), 7.10-7.18 (m, 3H,  $CH$ ), 7.52 (t,  $^3J_{HH} = 10.2$ , 2H,  $CH$ ).  $^{13}C\{^1H\}$  NMR (75 MHz,  $CDCl_3$ ):  $\delta$  19.81 ( $CH(CH_3)_2$ ), 20.53 ( $CH(CH_3)_2$ ), 27.56 ( $CH(CH_3)_2$ ), 52.82 ( $CH_2$ ), 118.62 ( $C_4$ ), 125.62 (Ph), 128.86 (Ph), 129.01 (Ph), 129.07 ( $C_{2,6}$ ), 135.08 (CF), 135.48 (Ph), 139.34 (CF), 140.76 ( $C_{3,5}$ ), 146.83 (CF), 149.83 (CF), 156.57 ( $C_{1,7}$ ).  $^{19}F\{^1H\}$  NMR (282 MHz,  $CDCl_3$ ):  $\delta$  -132.91 (dd,  $^3J_{FF} = 27.63, 10.99$  Hz, 6F, *ortho*- $C_6F_5$ ), -160.40 (t,  $^3J_{FF} = 21.43$  Hz, 3F, *para*- $C_6F_5$ ), -165.37 (m, 6F, *meta*- $C_6F_5$ ).  $^{11}B\{^1H\}$  NMR (128 MHz,  $CDCl_3$ ):  $\delta$  -2.73 (s).

**Scheme for the attempted synthesis of germacarboxylic Acid.**

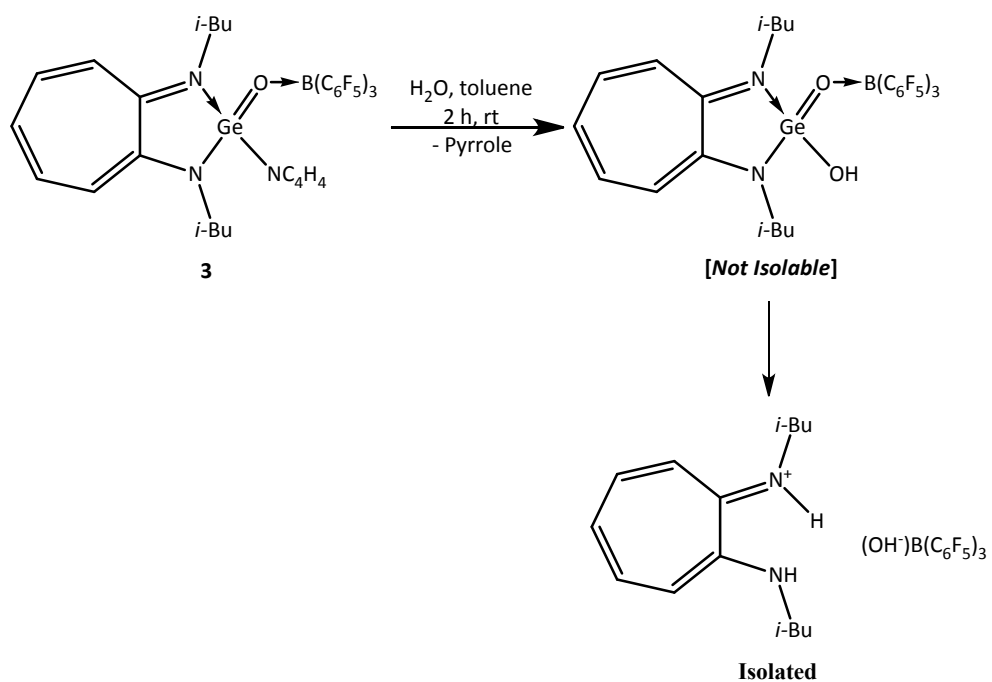

**Scheme S1.** Reaction of compound **3** with water.

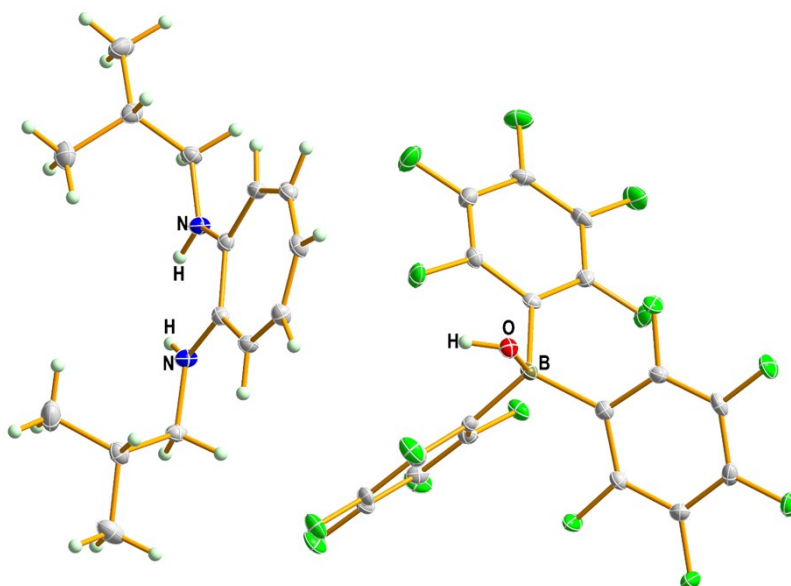

**Figure S0.** Molecular structure of the isolated ATI ligand salt  $[\text{ATI}(\text{H})]^+[(\text{OH})(\text{B}(\text{C}_6\text{F}_5)_3)]^-$ .

## 2. NMR Spectra of Compounds D1, D3-D5, 1-7, 9, and 10

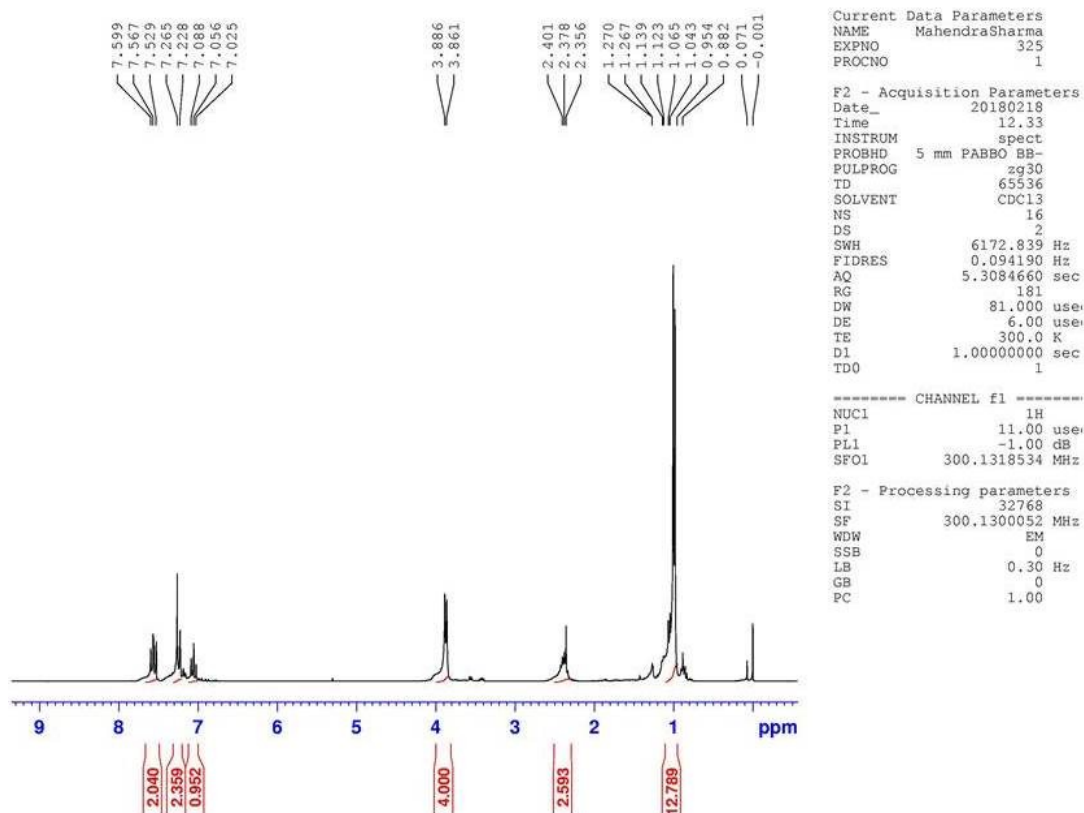

Figure S1. <sup>1</sup>H NMR spectrum of compound D1 in CDCl<sub>3</sub> at 300 K.

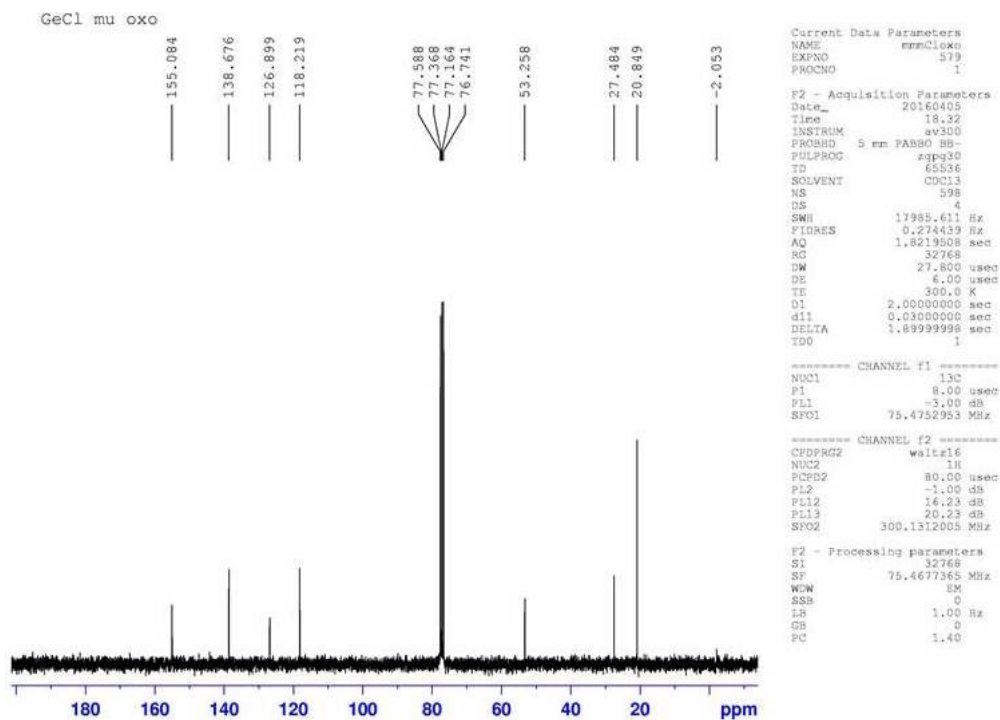

Figure S2. <sup>13</sup>C NMR spectrum of compound D1 in CDCl<sub>3</sub> at 300 K.

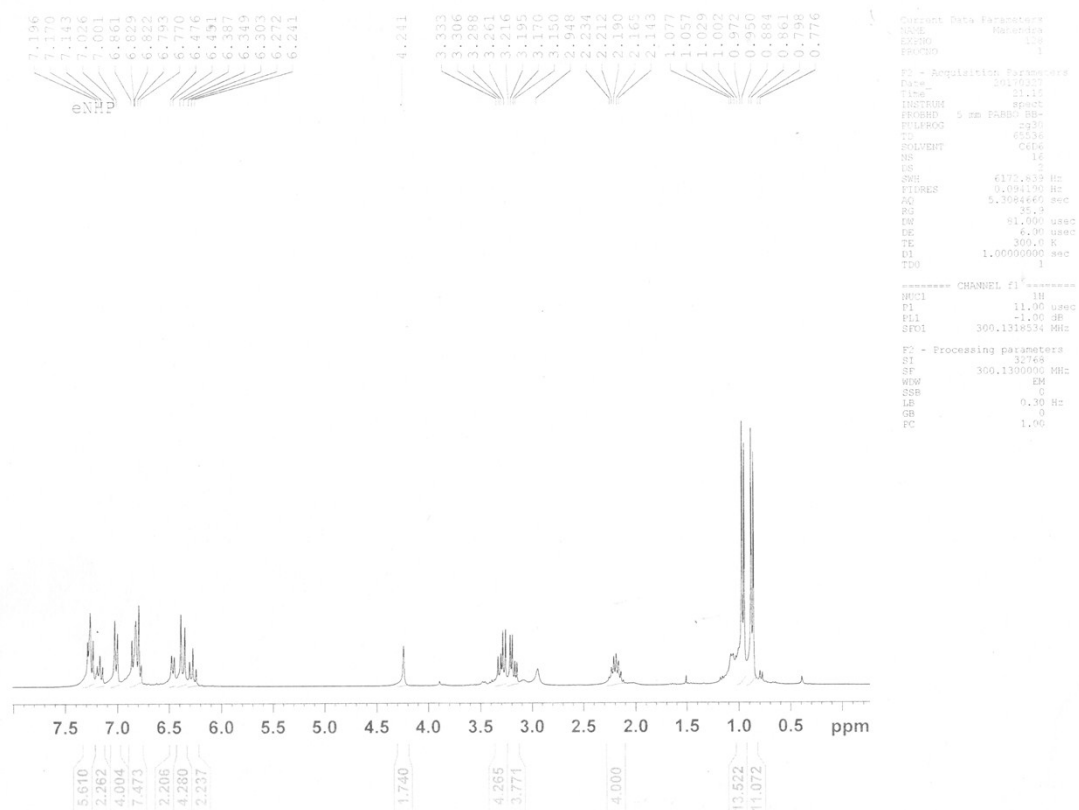

Figure S3. <sup>1</sup>H NMR spectrum of compound D3 in CDCl<sub>3</sub> at 300 K.

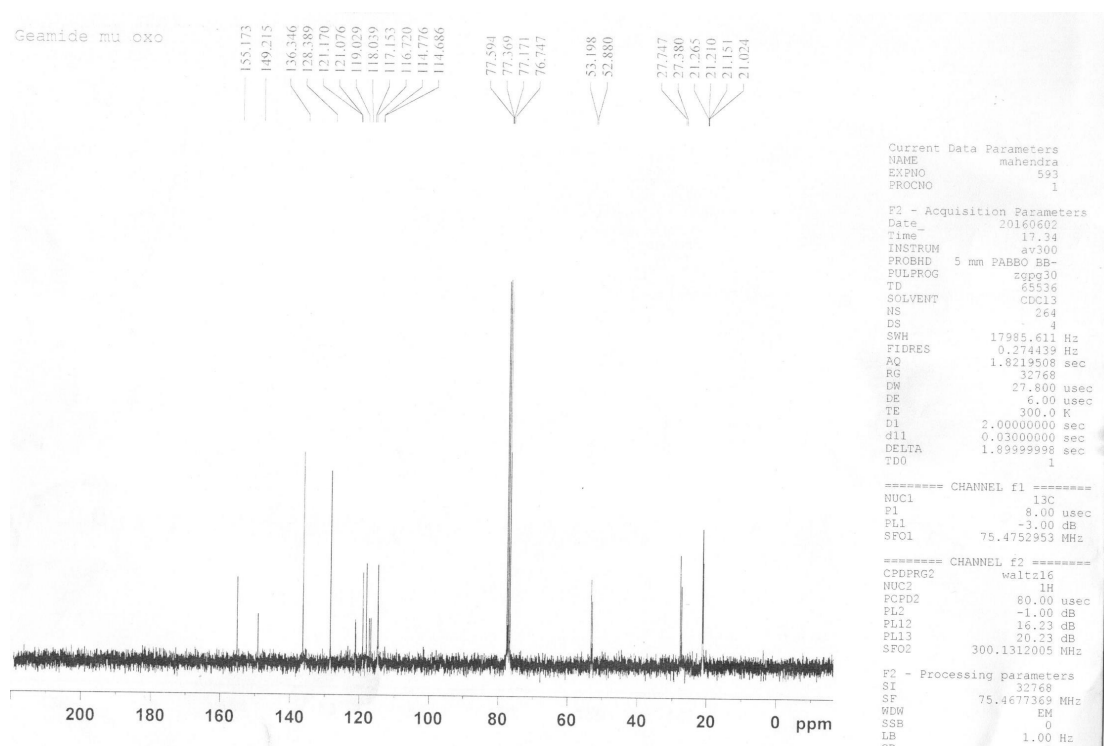

Figure S4. <sup>13</sup>C NMR spectrum of compound D3 in CDCl<sub>3</sub> at 300 K.

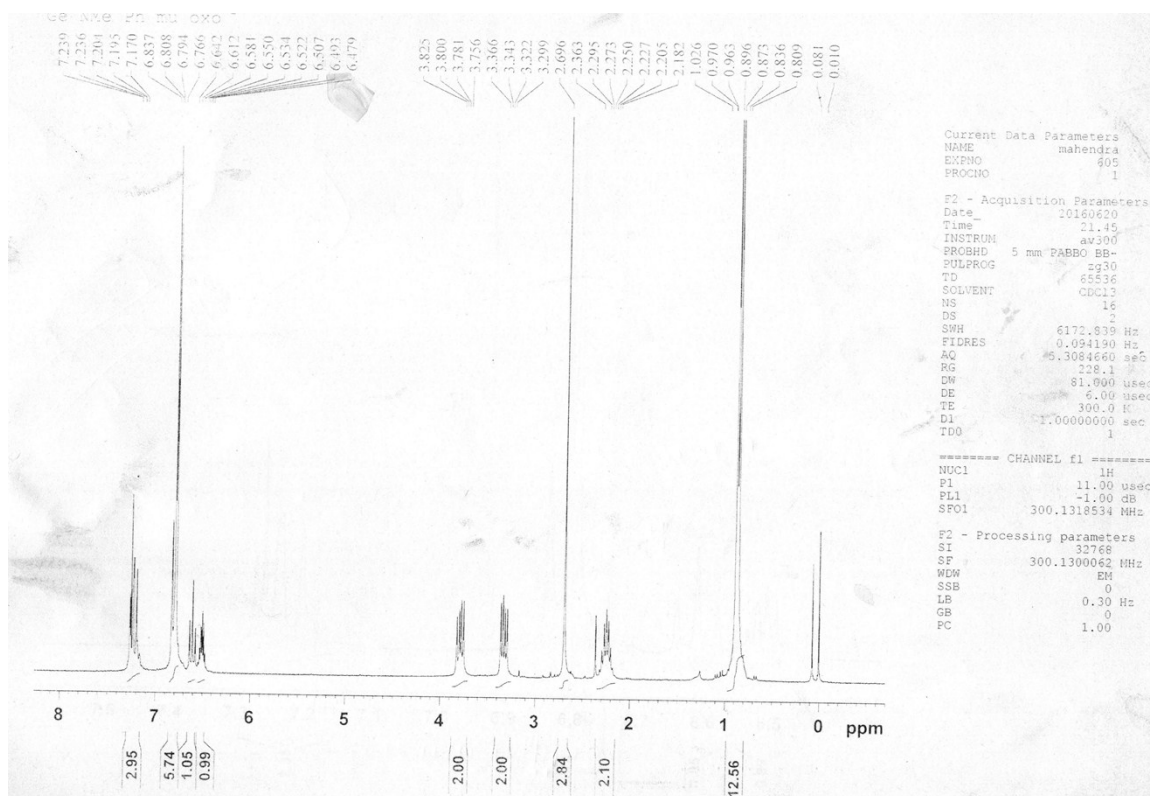

Figure S5.  $^1\text{H}$  NMR spectrum of compound **D4** in  $\text{CDCl}_3$  at 300 K.

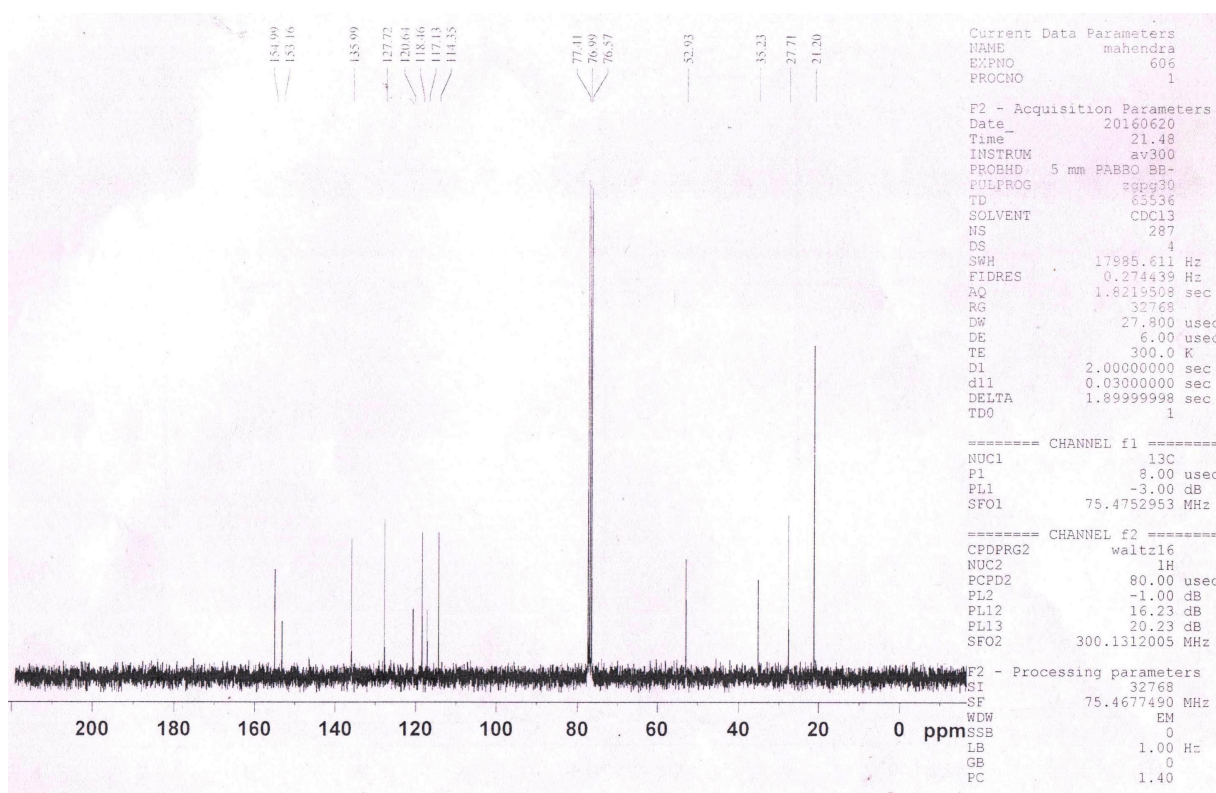

Figure S6.  $^{13}\text{C}$  NMR spectrum of compound **D4** in  $\text{CDCl}_3$  at 300 K.



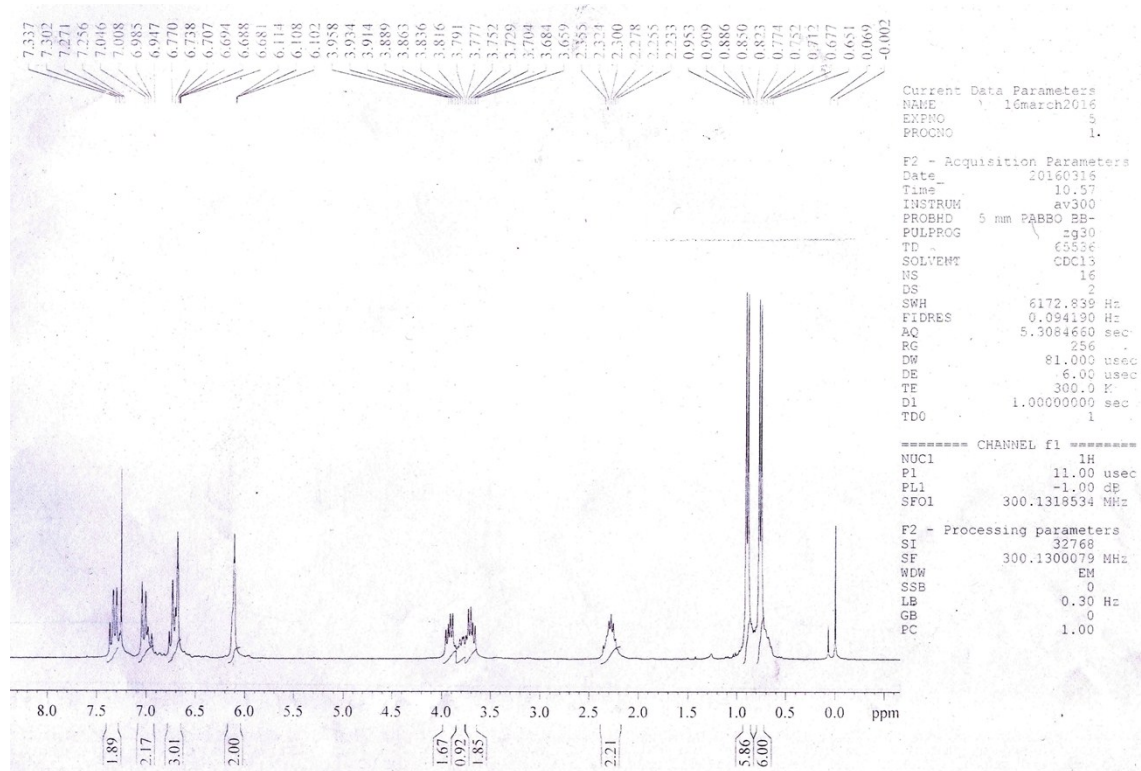

Figure S7.  $^1\text{H}$  NMR spectrum of compound **D5** in  $\text{CDCl}_3$  at 300 K.

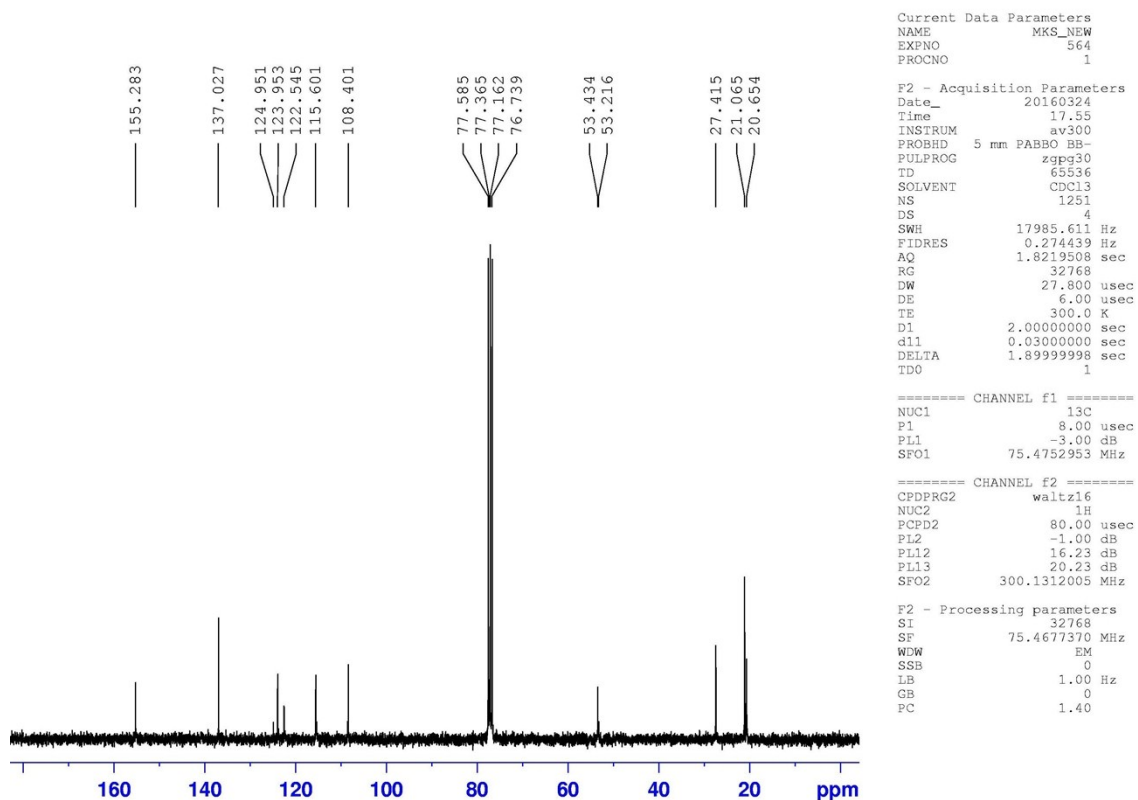

Figure S8.  $^{13}\text{C}$  NMR spectrum of compound **D5** in  $\text{CDCl}_3$  at 300 K.

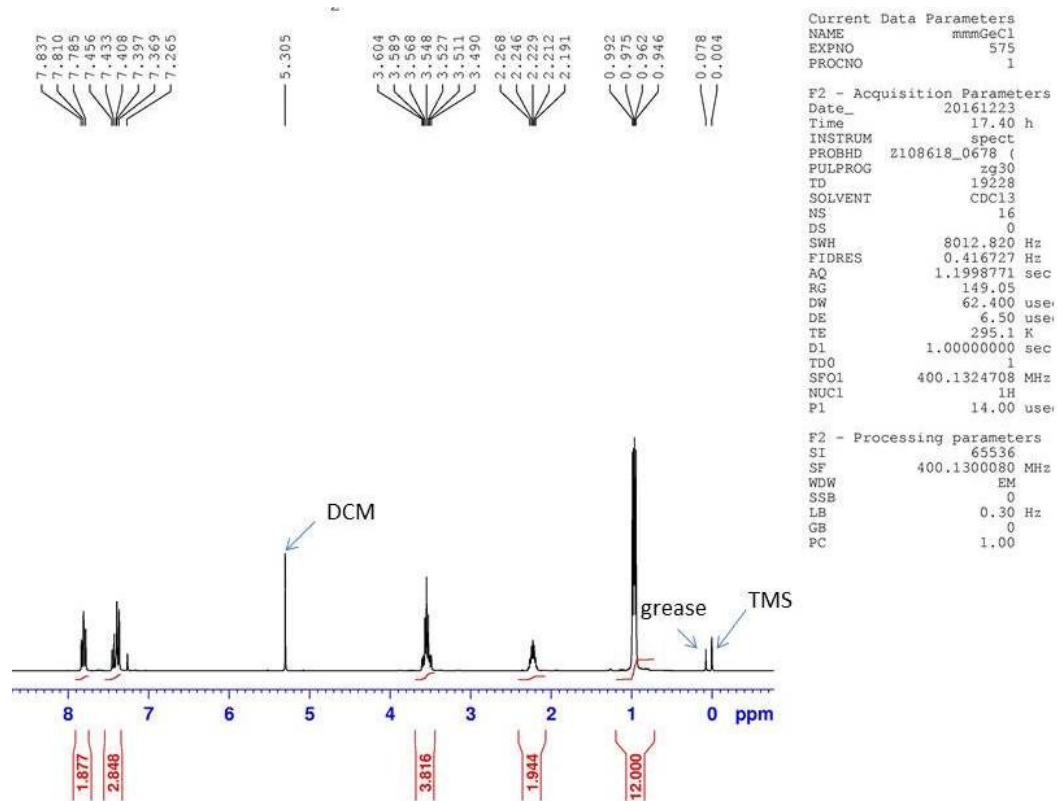

Figure S9.  $^1\text{H}$  NMR spectrum of compound **1** in  $\text{CDCl}_3$  at 300 K.

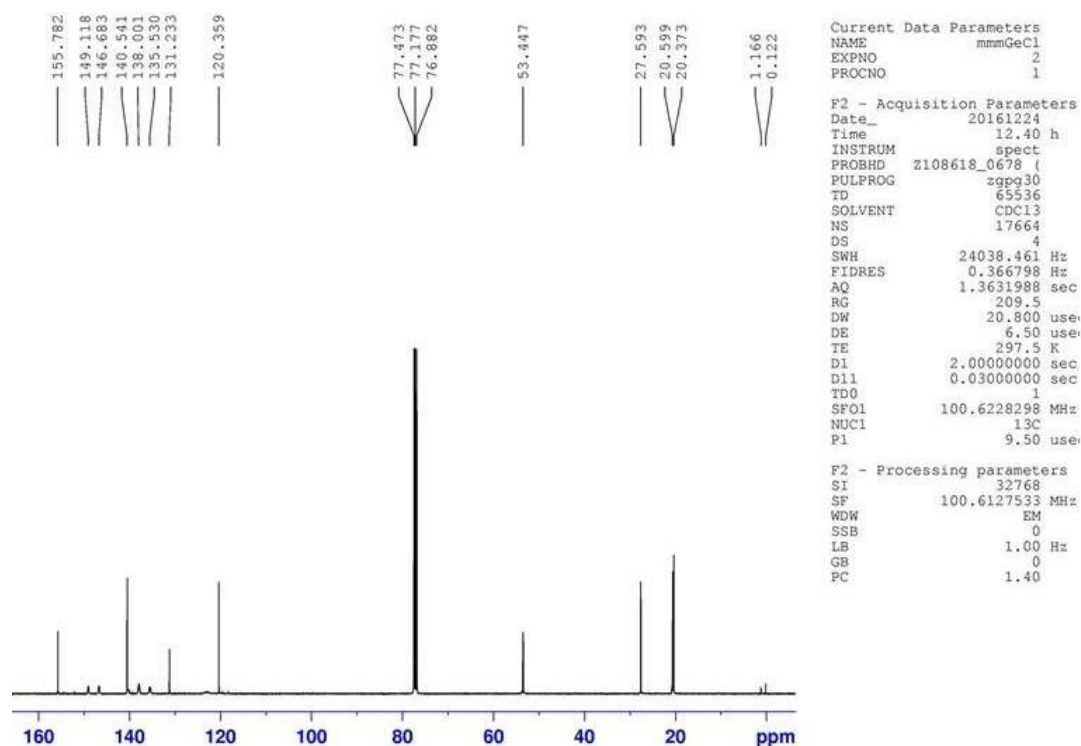

Figure S10.  $^{13}\text{C}$  NMR spectrum of compound **1** in  $\text{CDCl}_3$  at 300 K.

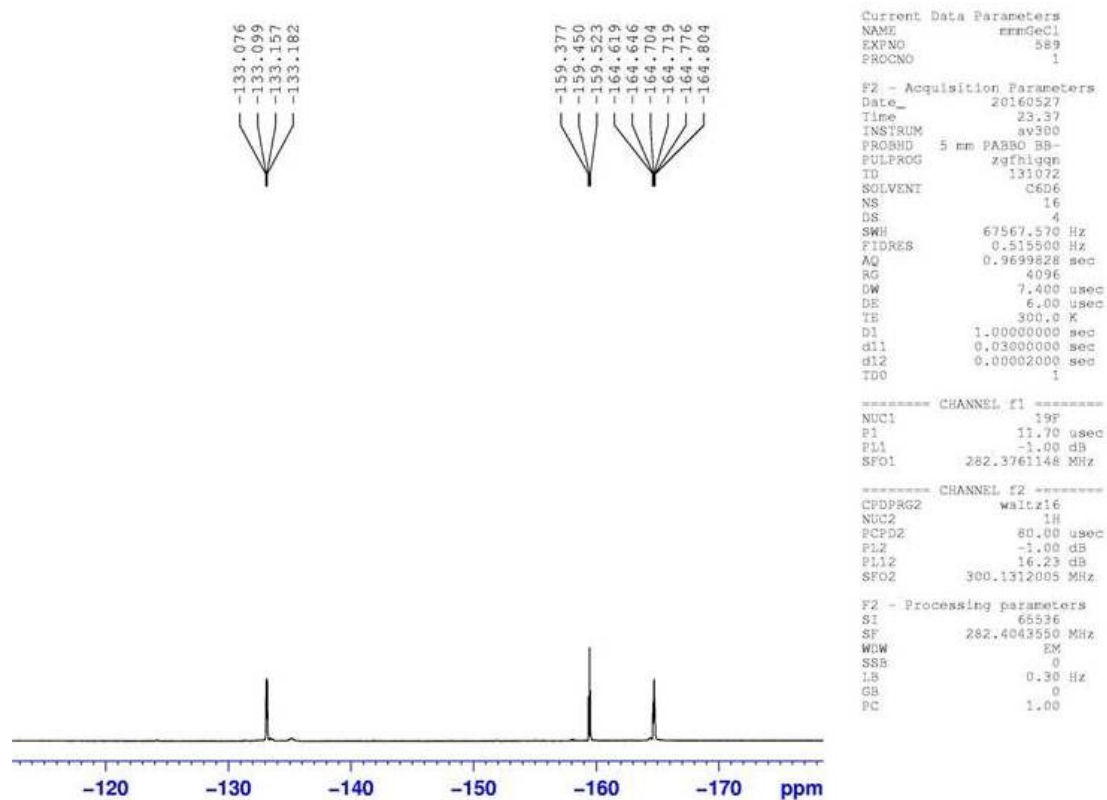

Figure S11.  $^{19}\text{F}$  NMR spectrum of compound 1 in  $\text{CDCl}_3$  at 300 K.

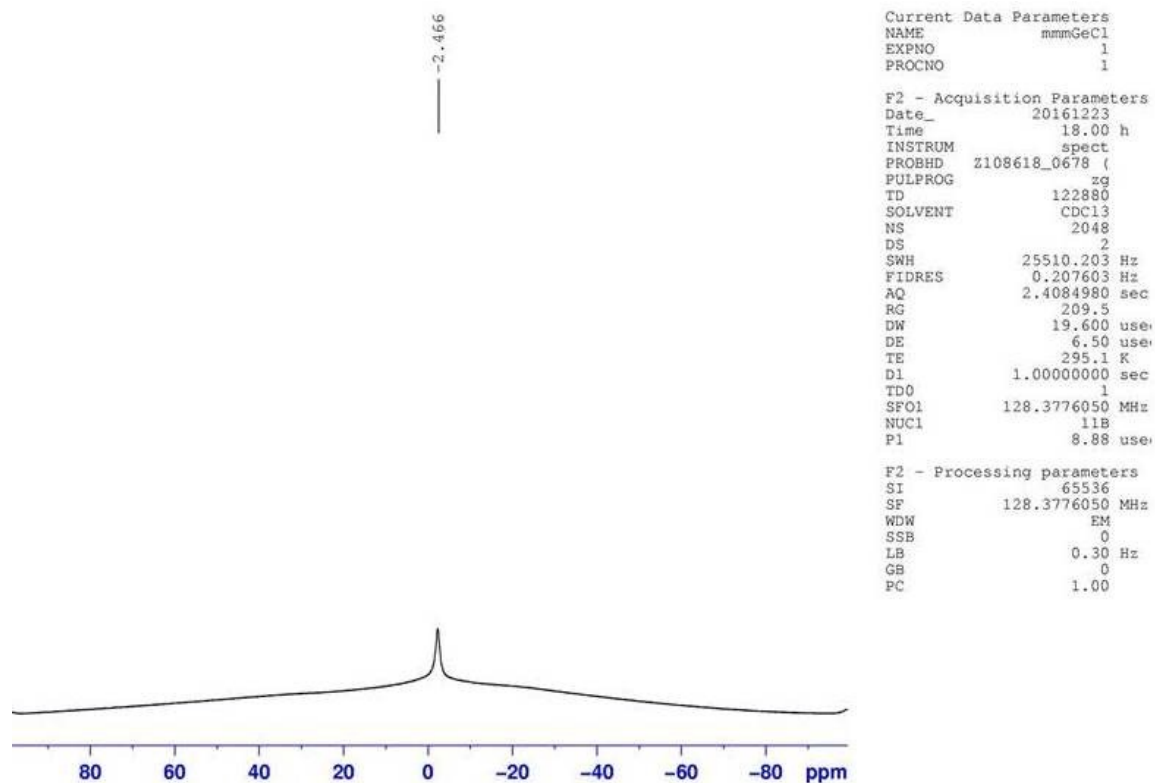

Figure S12.  $^{11}\text{B}$  NMR spectrum of compound 1 in  $\text{CDCl}_3$  at 300 K.

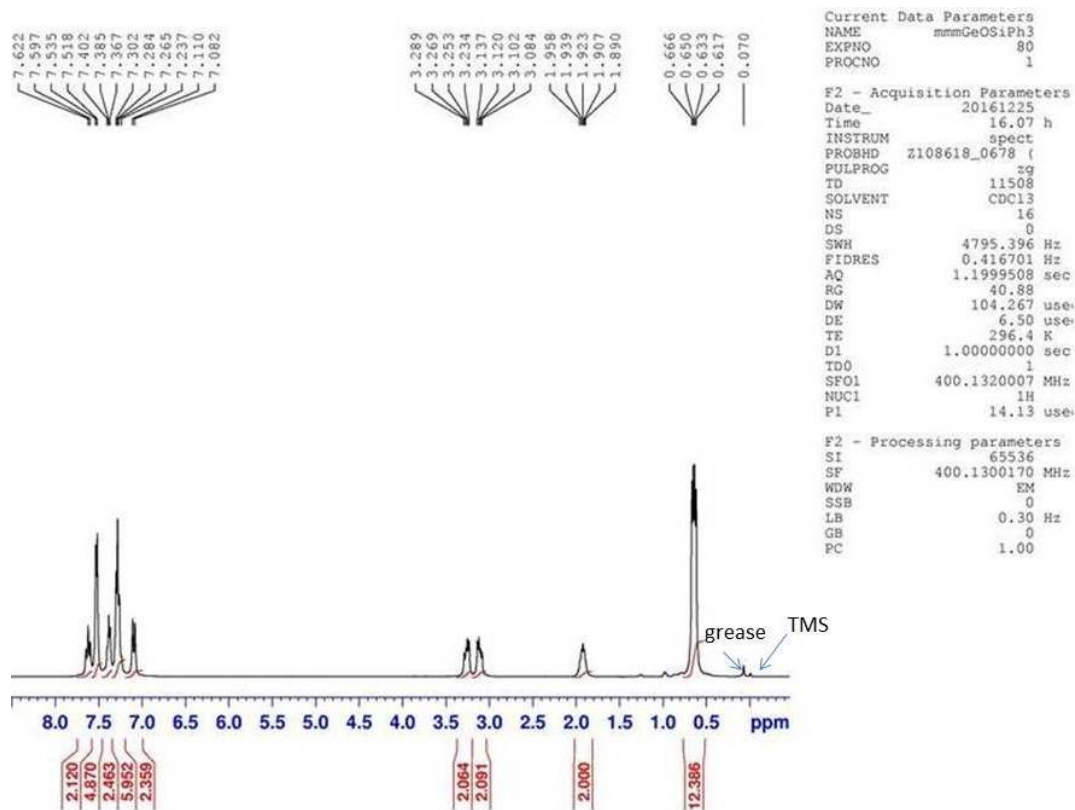

Figure S13.  $^1\text{H}$  NMR spectrum of compound **2** in  $\text{CDCl}_3$  at 300 K.

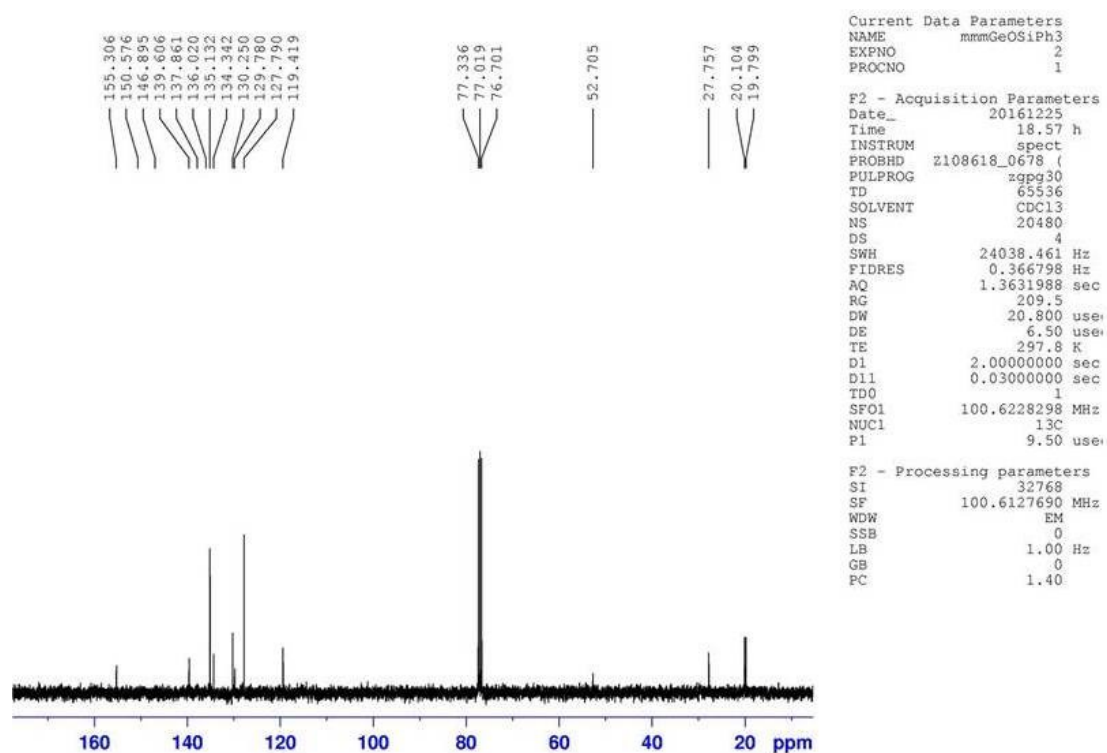

Figure S14.  $^{13}\text{C}$  NMR spectrum of compound **2** in  $\text{CDCl}_3$  at 300 K.

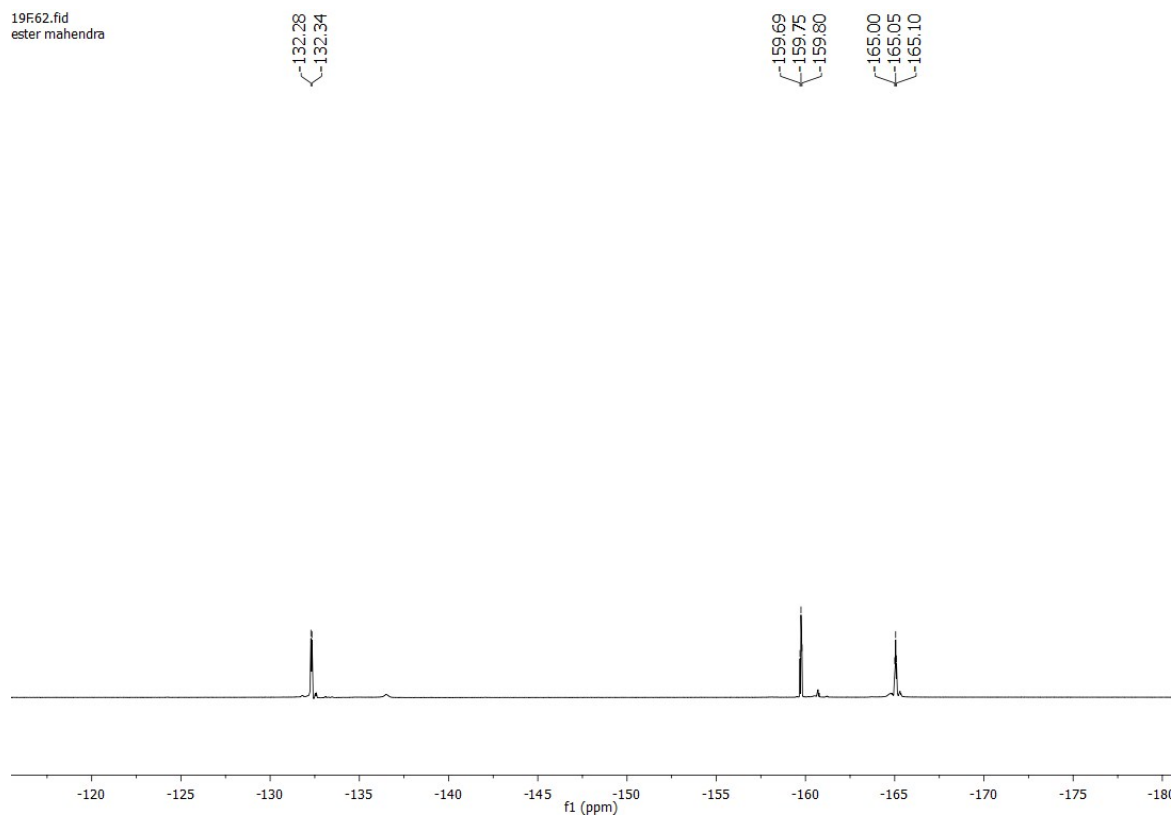

**Figure S15.**  $^{19}\text{F}$  NMR spectrum of compound **2** in  $\text{CDCl}_3$  at 300 K.

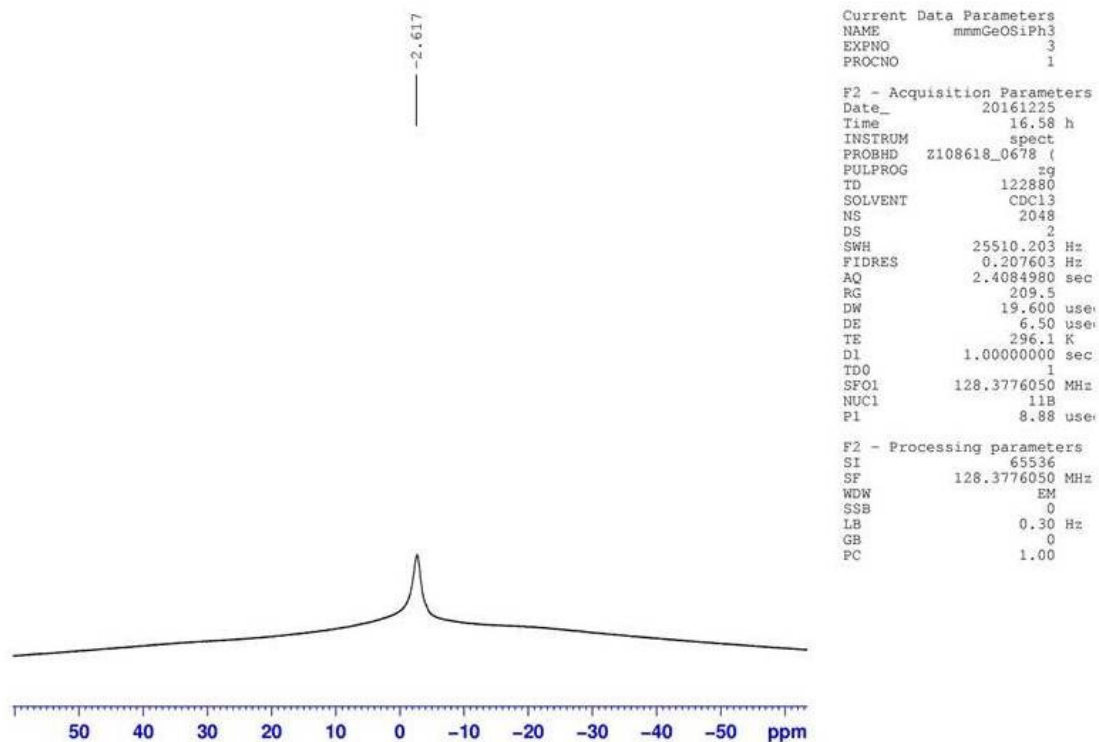

**Figure S16.**  $^{11}\text{B}$  NMR spectrum of compound **2** in  $\text{CDCl}_3$  at 300 K.

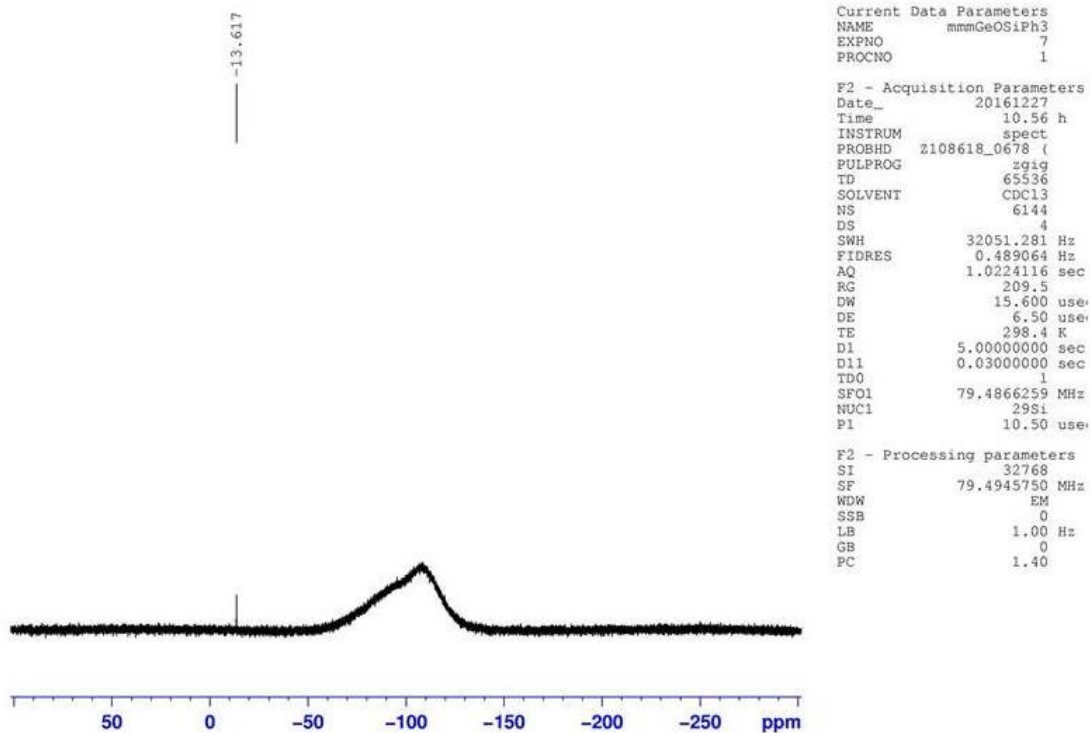

Figure S17.  $^{29}\text{Si}$  NMR spectrum of compound **2** in  $\text{CDCl}_3$  at 300 K.

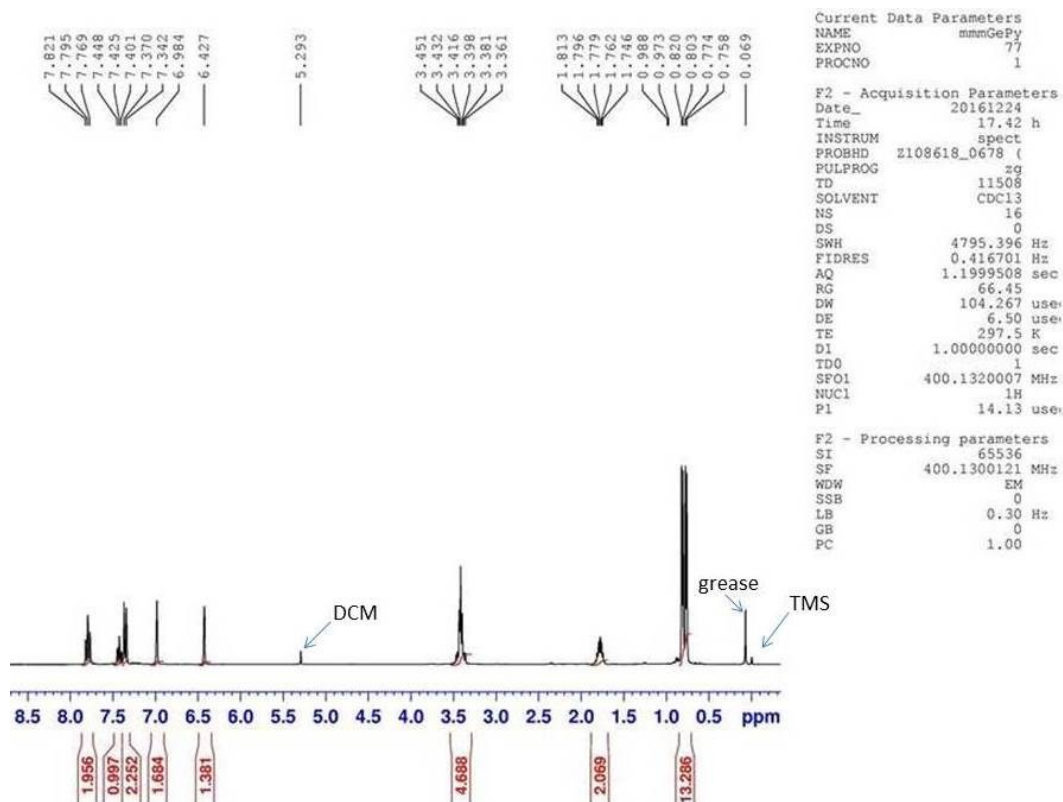

Figure S18.  $^1\text{H}$  NMR spectrum of compound **3** in  $\text{CDCl}_3$  at 300 K.

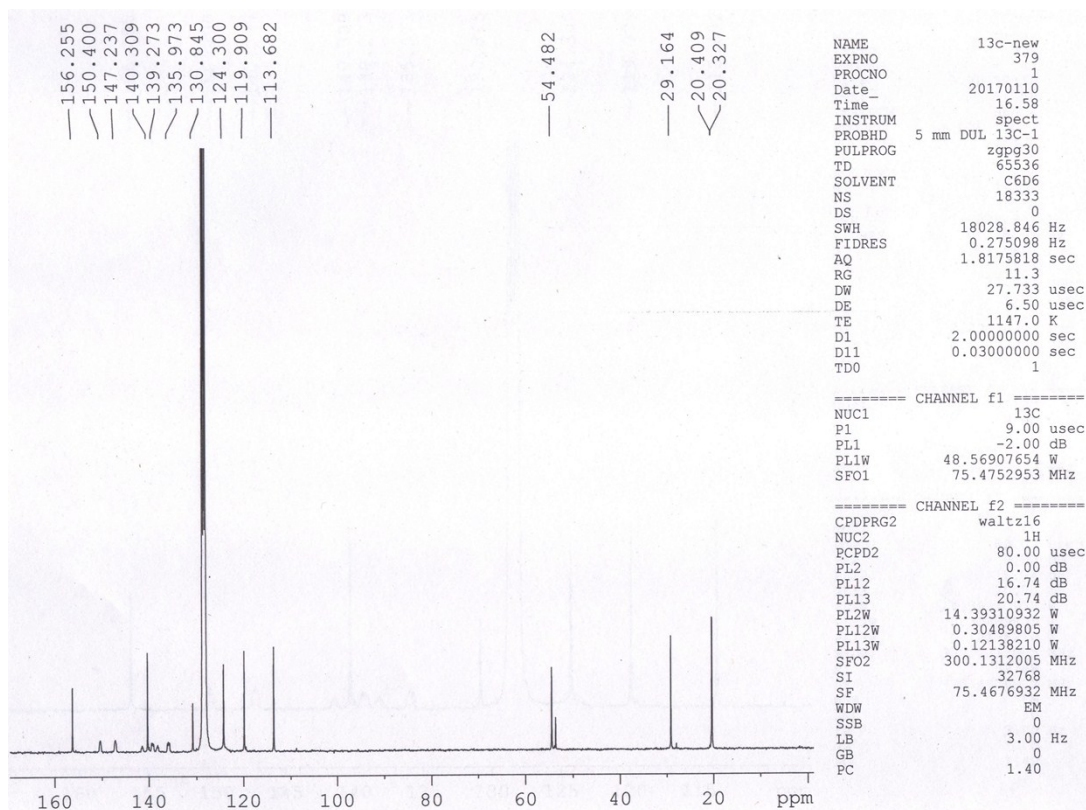

**Figure S19.**  $^{13}\text{C}$  NMR spectrum of compound **3** in  $\text{C}_6\text{D}_6$  at 300 K.

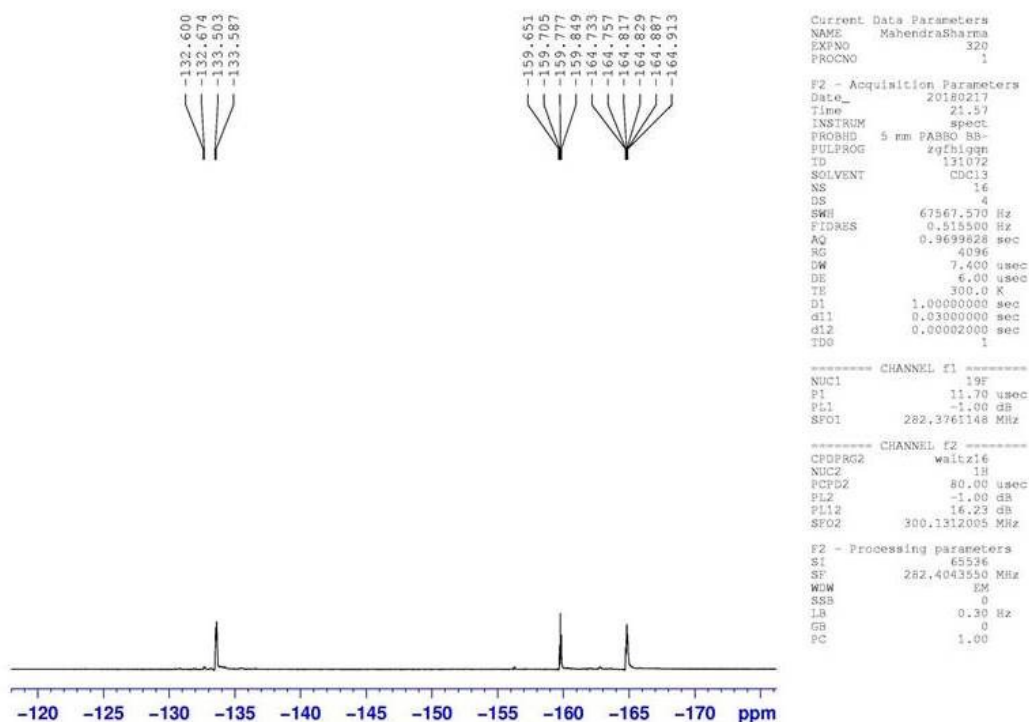

**Figure S20.**  $^{19}\text{F}$  NMR spectrum of compound **3** in  $\text{CDCl}_3$  at 300 K.

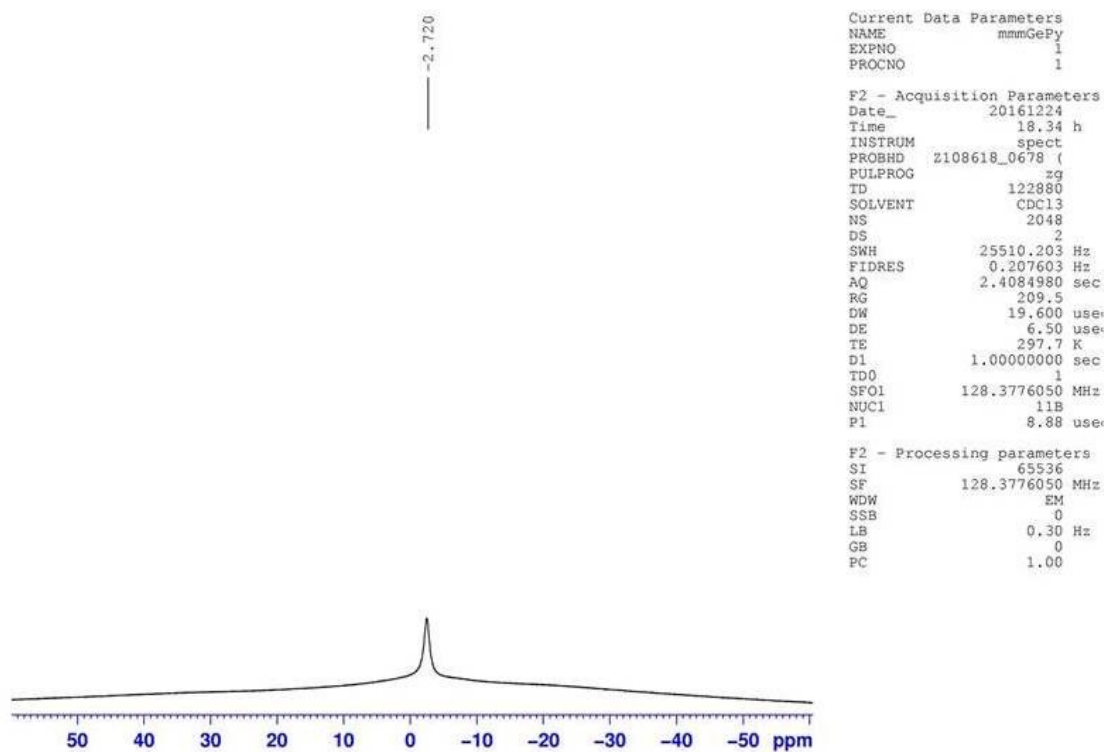

Figure S21.  $^{11}\text{B}$  NMR spectrum of compound **3** in  $\text{CDCl}_3$  at 300 K.

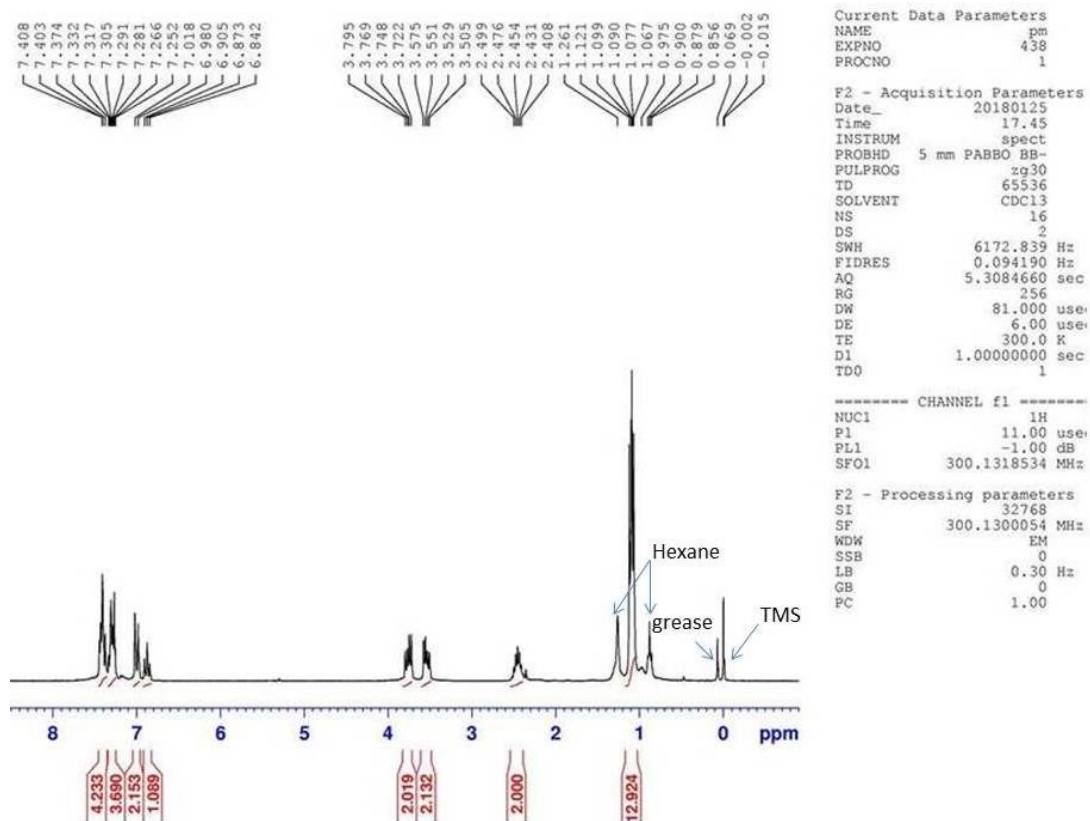

Figure S22.  $^1\text{H}$  NMR spectrum of compound **4** in  $\text{CDCl}_3$  at 300 K.



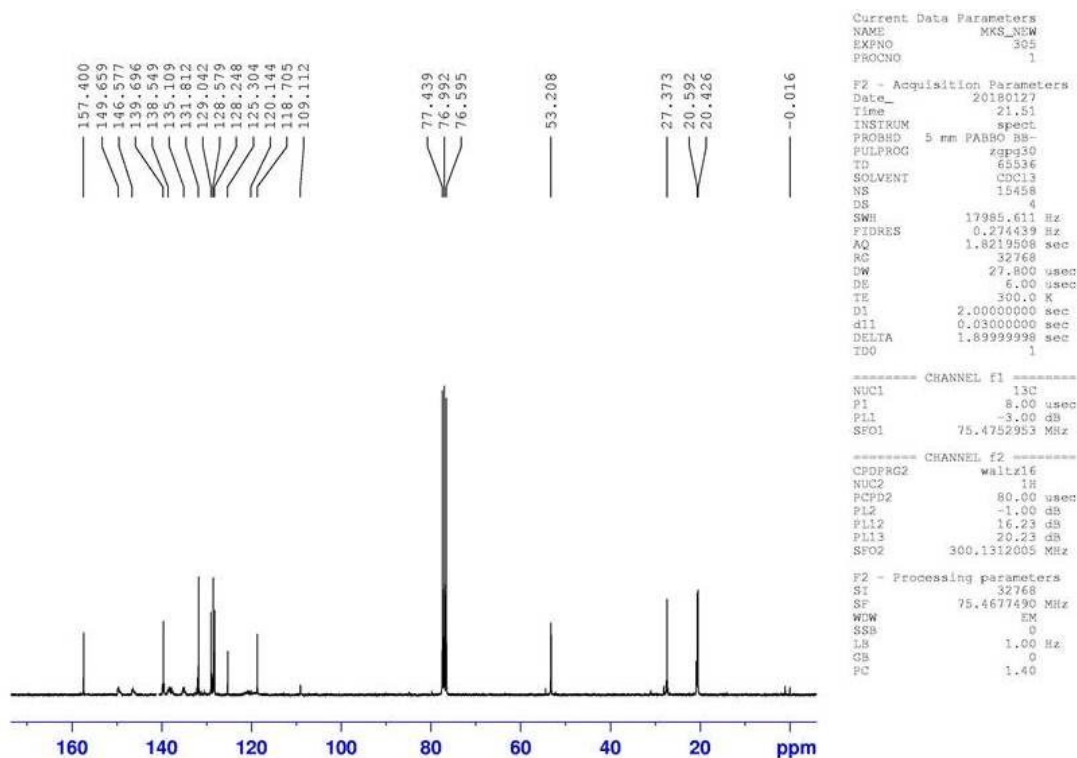

Figure S23.  $^{13}\text{C}$  NMR spectrum of compound 4 in  $\text{CDCl}_3$  at 300 K.

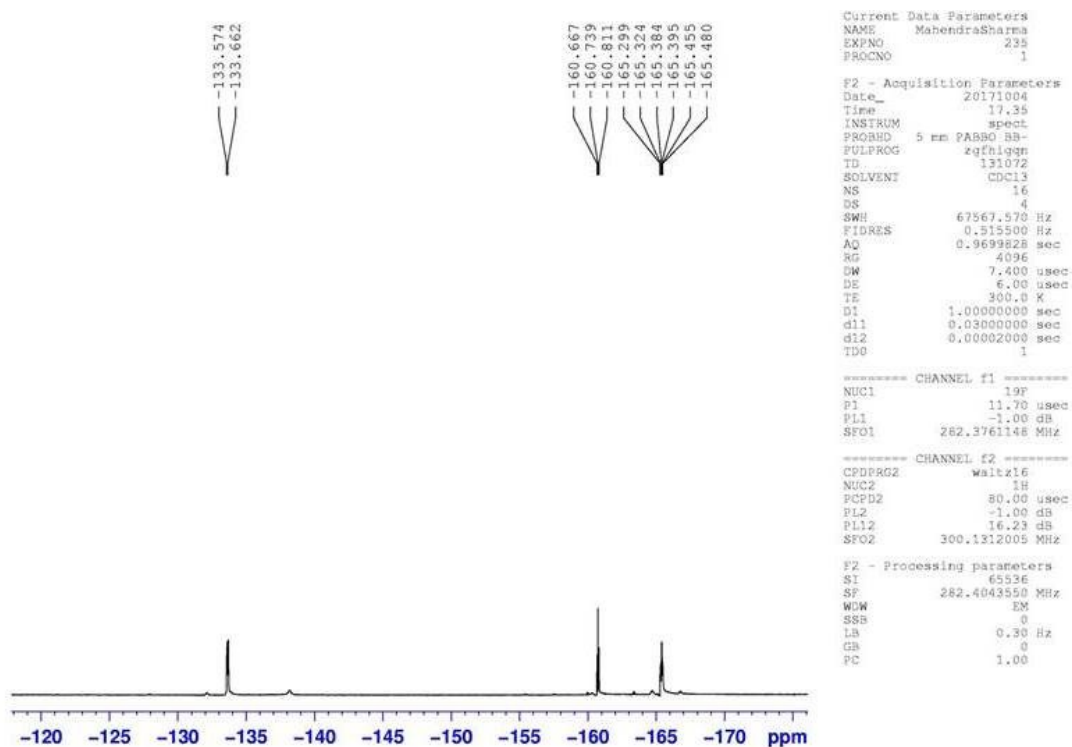

Figure S24.  $^{19}\text{F}$  NMR spectrum of compound 4 in  $\text{CDCl}_3$  at 300 K.

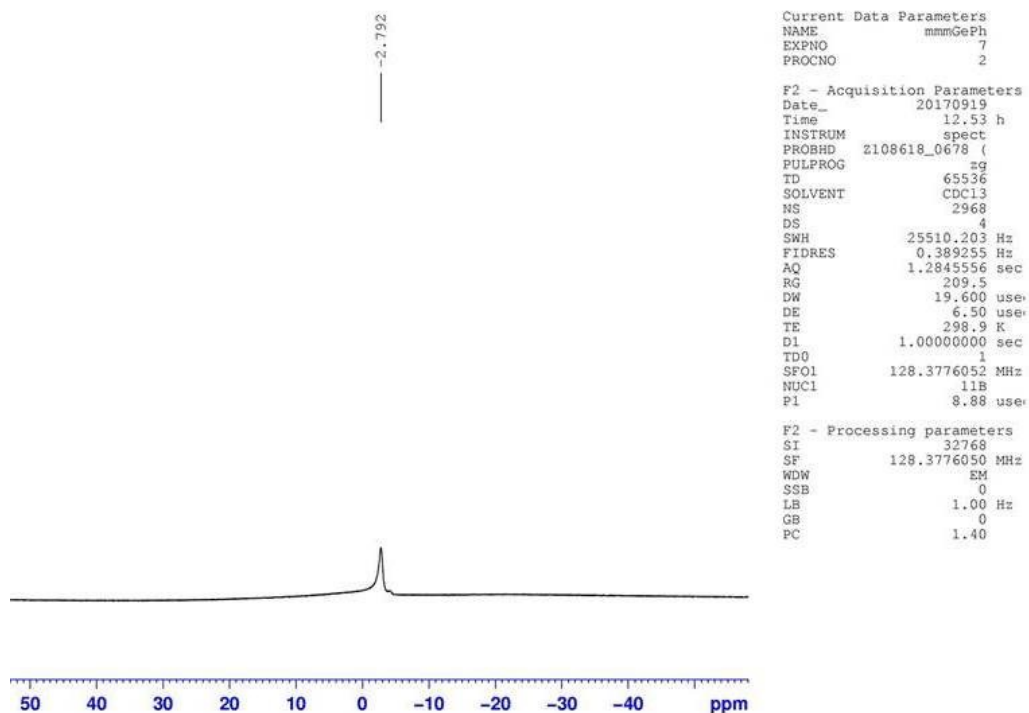

Figure S25.  $^{11}\text{B}$  NMR spectrum of compound **4** in  $\text{CDCl}_3$  at 300 K.

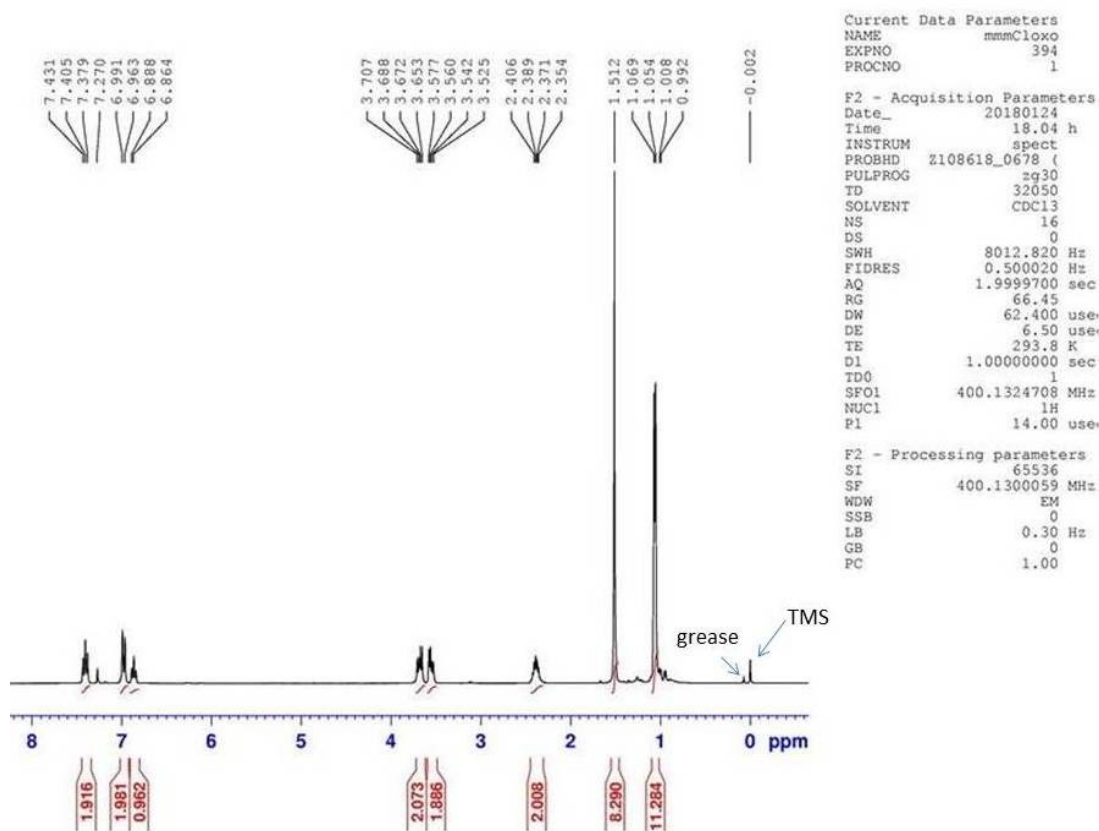

Figure S26.  $^1\text{H}$  NMR spectrum of compound **5** in  $\text{CDCl}_3$  at 300 K.

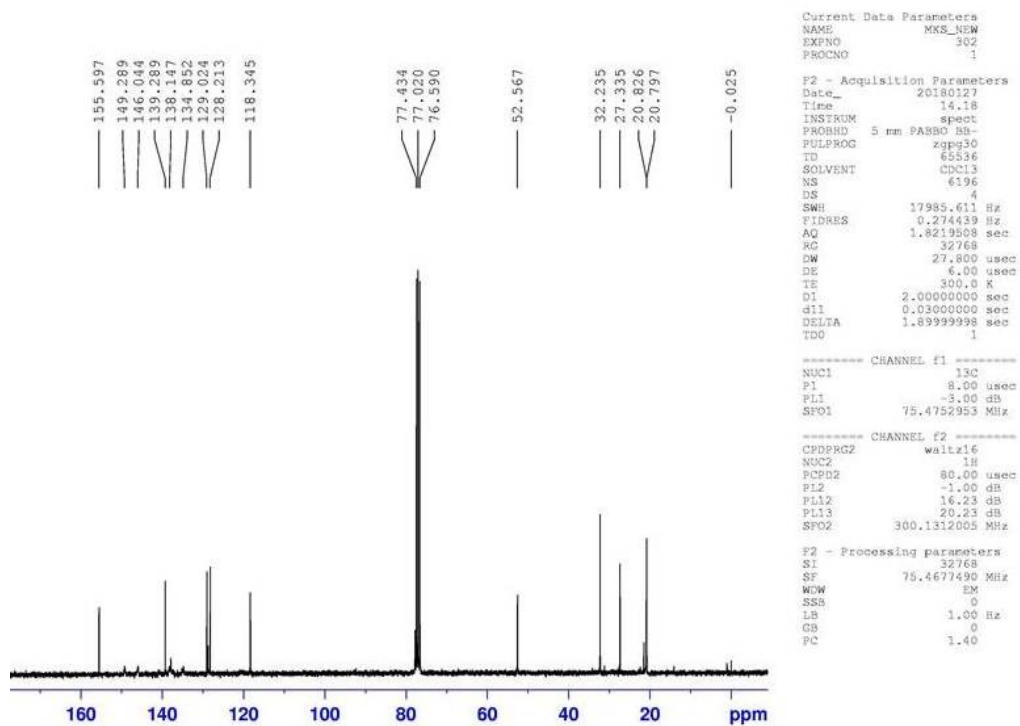

Figure S27.  $^{13}\text{C}$  NMR spectrum of compound **5** in  $\text{CDCl}_3$  at 300 K.

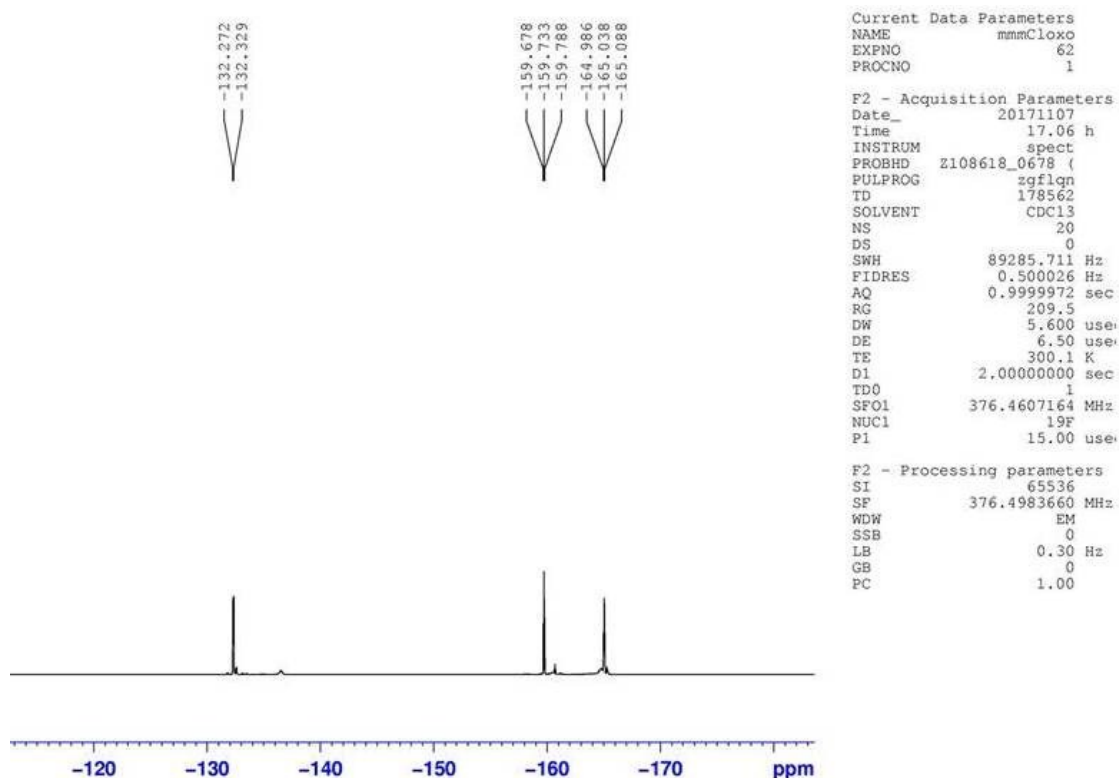

Figure S28.  $^{19}\text{F}$  NMR spectrum of compound **5** in  $\text{CDCl}_3$  at 300 K.

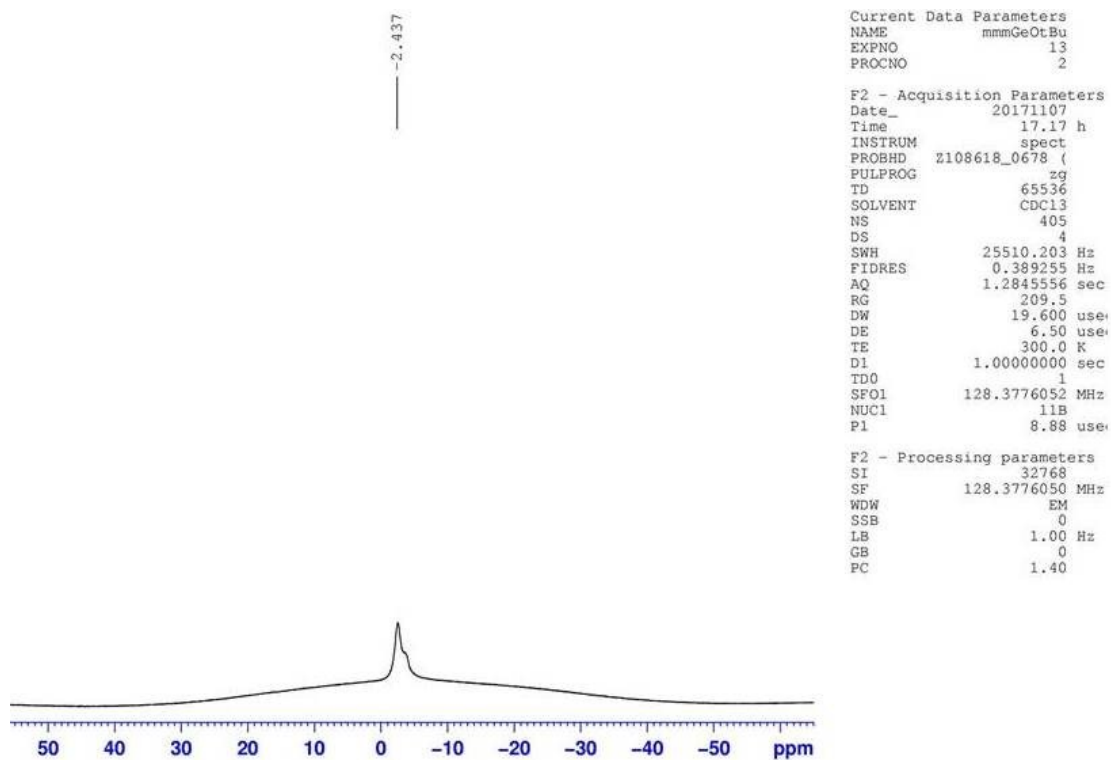

**Figure S29.**  $^{11}\text{B}$  NMR spectrum of compound **5** in  $\text{CDCl}_3$  at 300 K.

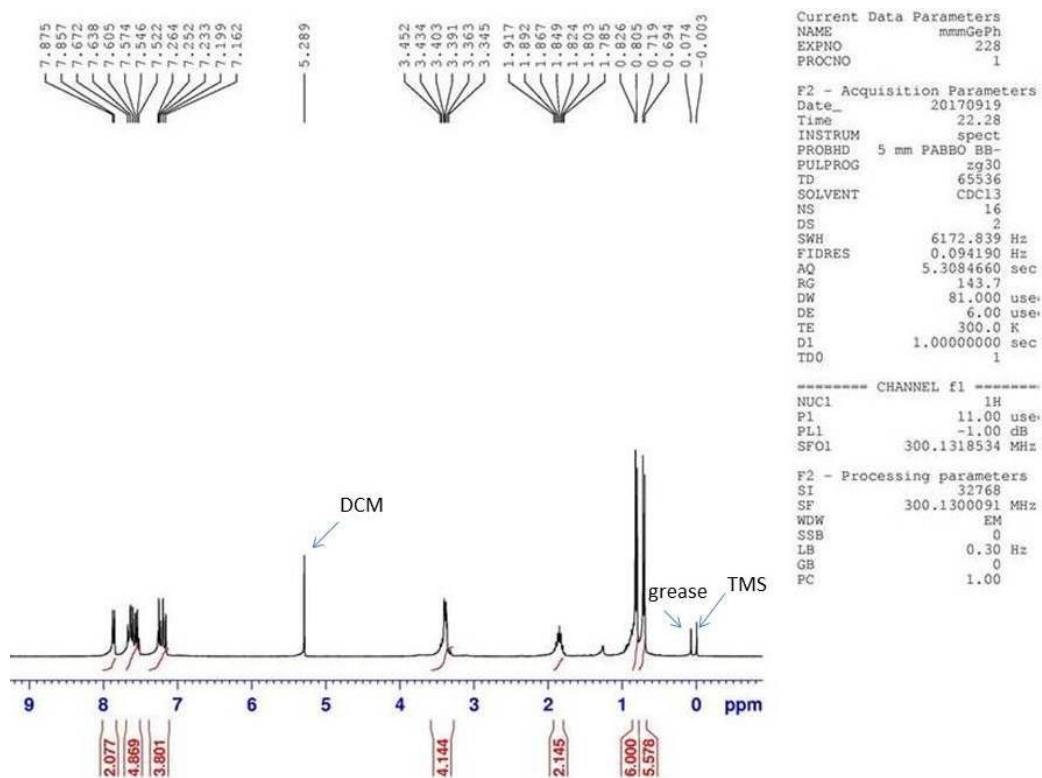

**Figure S30.**  $^1\text{H}$  NMR spectrum of compound **6** in  $\text{CDCl}_3$  at 300 K.

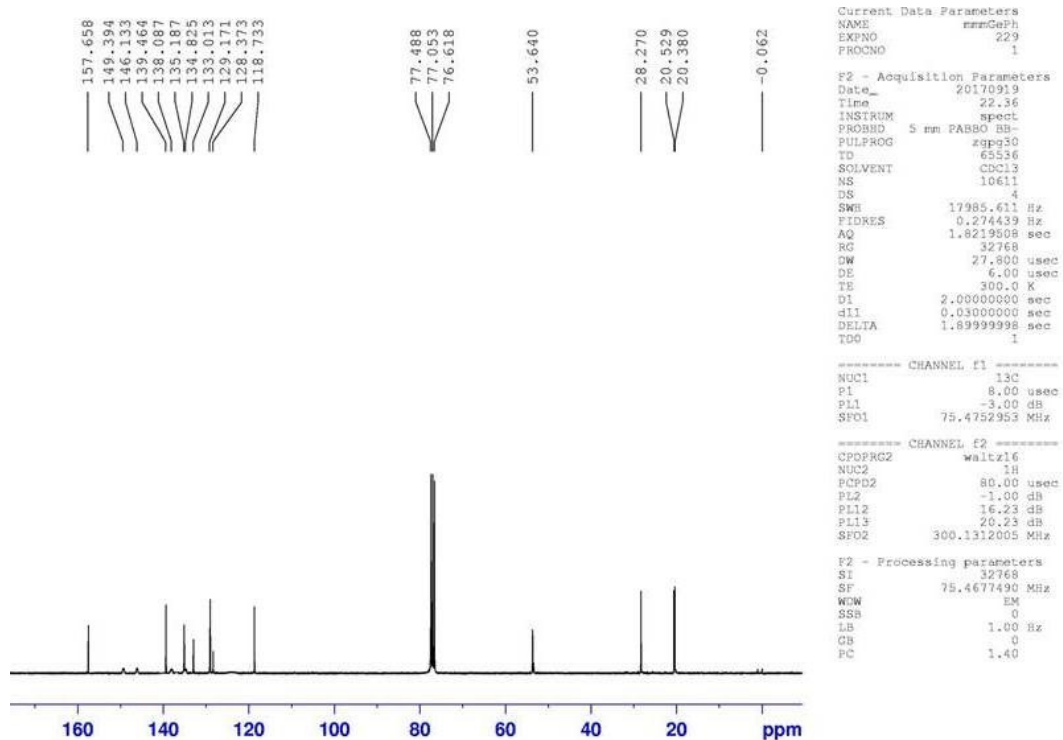

Figure S31.  $^{13}\text{C}$  NMR spectrum of compound **6** in  $\text{CDCl}_3$  at 300 K.

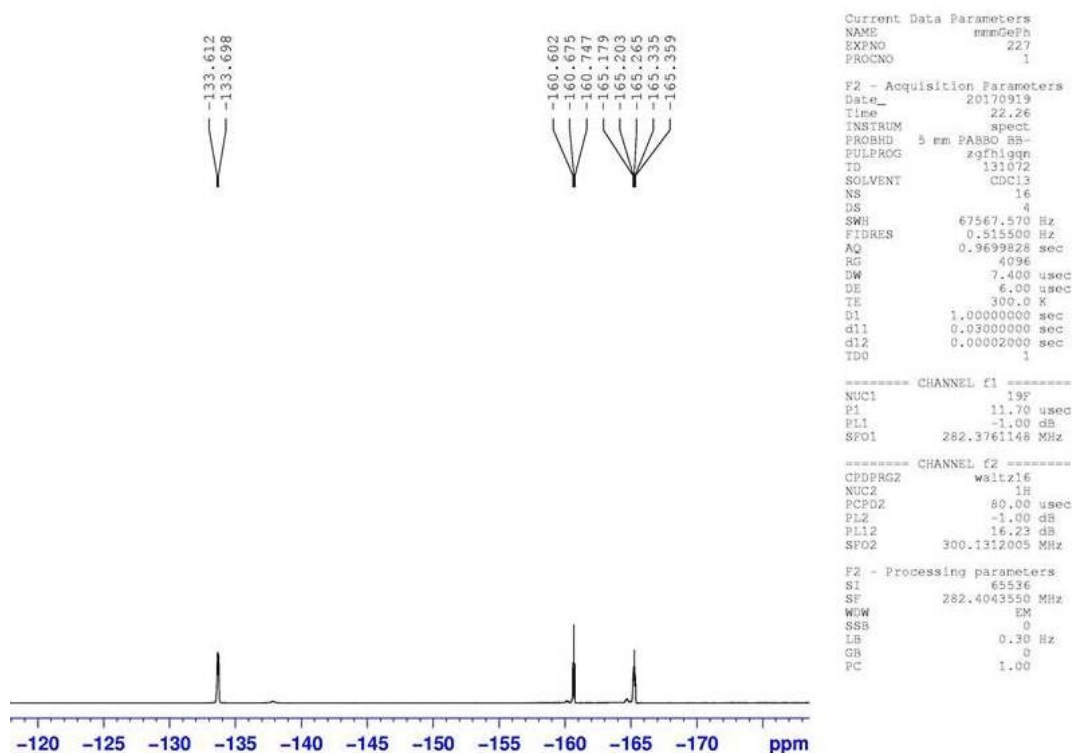

Figure S32.  $^{19}\text{F}$  NMR spectrum of compound **6** in  $\text{CDCl}_3$  at 300 K.

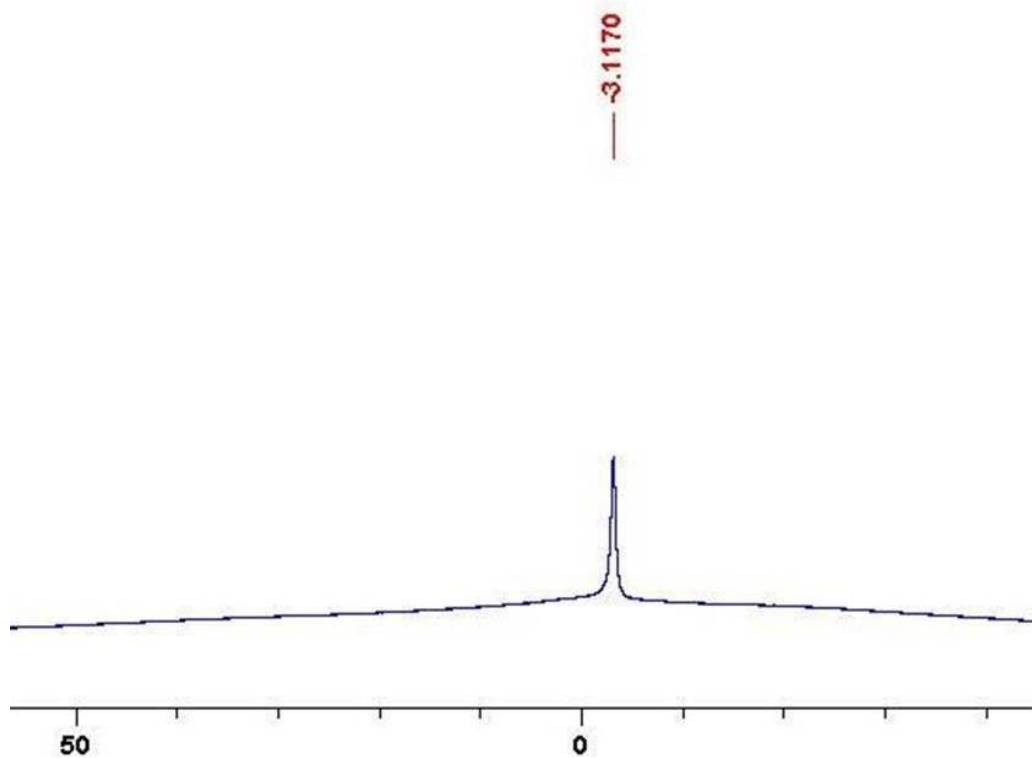

**Figure S33.**  $^{11}\text{B}$  NMR spectrum of compound **6** in  $\text{CDCl}_3$  at 300 K.

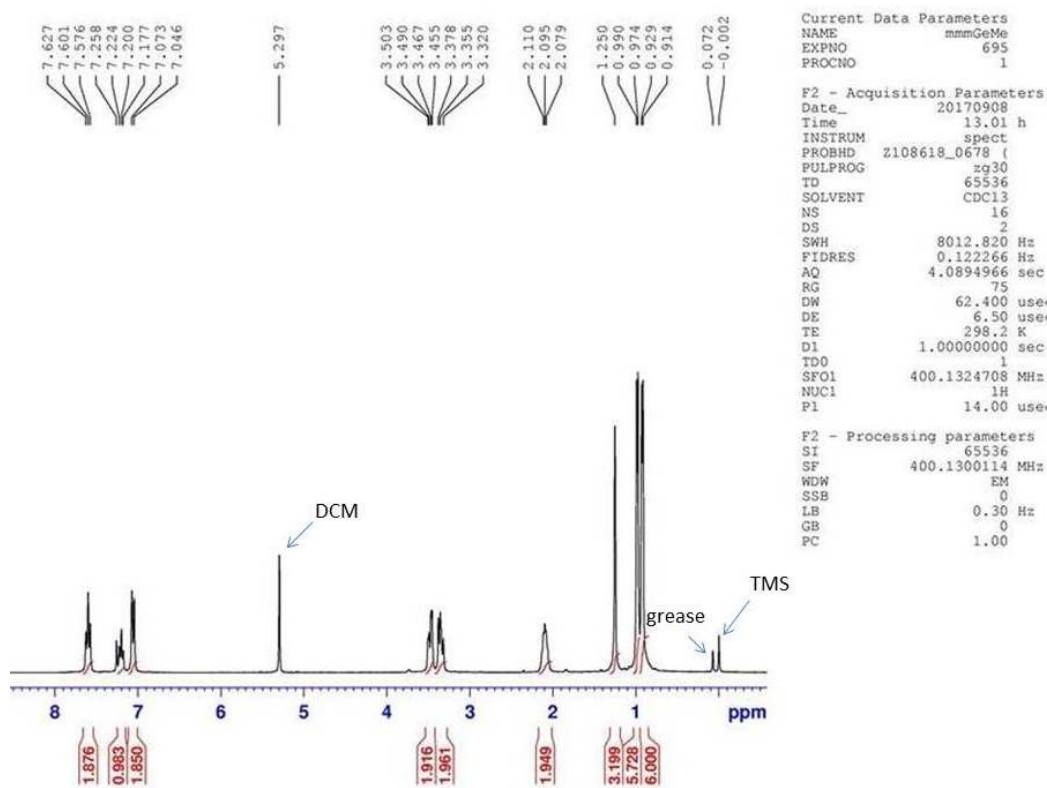

**Figure S34.**  $^1\text{H}$  NMR spectrum of compound **7** in  $\text{CDCl}_3$  at 300 K.

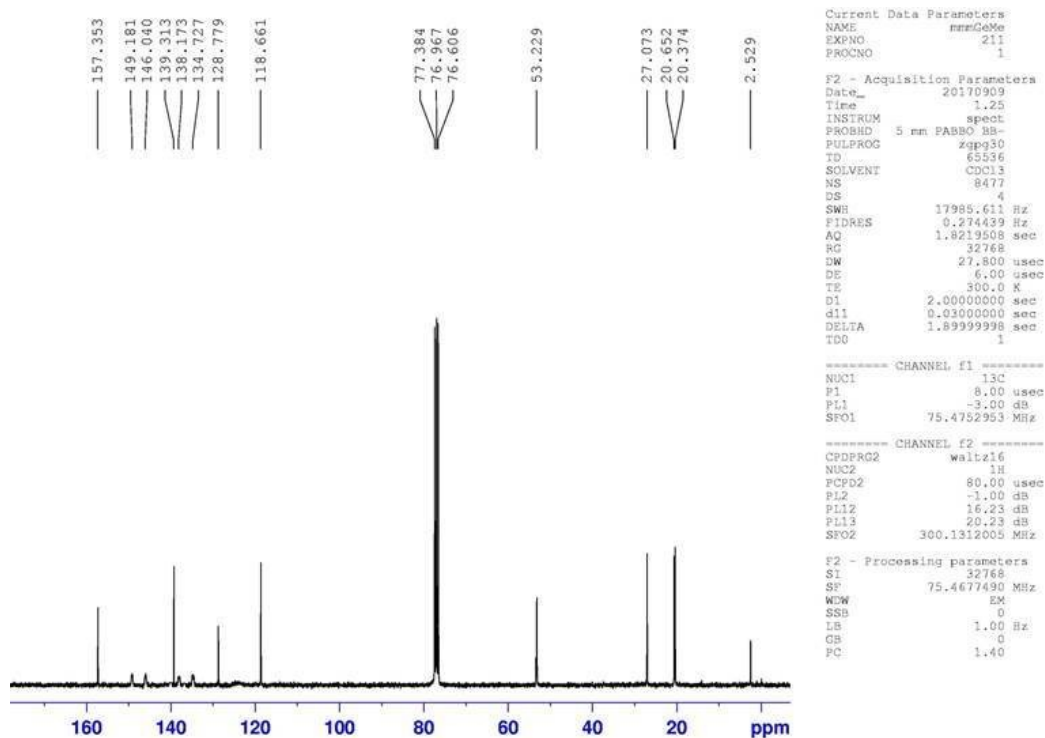

Figure S35.  $^{13}\text{C}$  NMR spectrum of compound **7** in  $\text{CDCl}_3$  at 300 K.

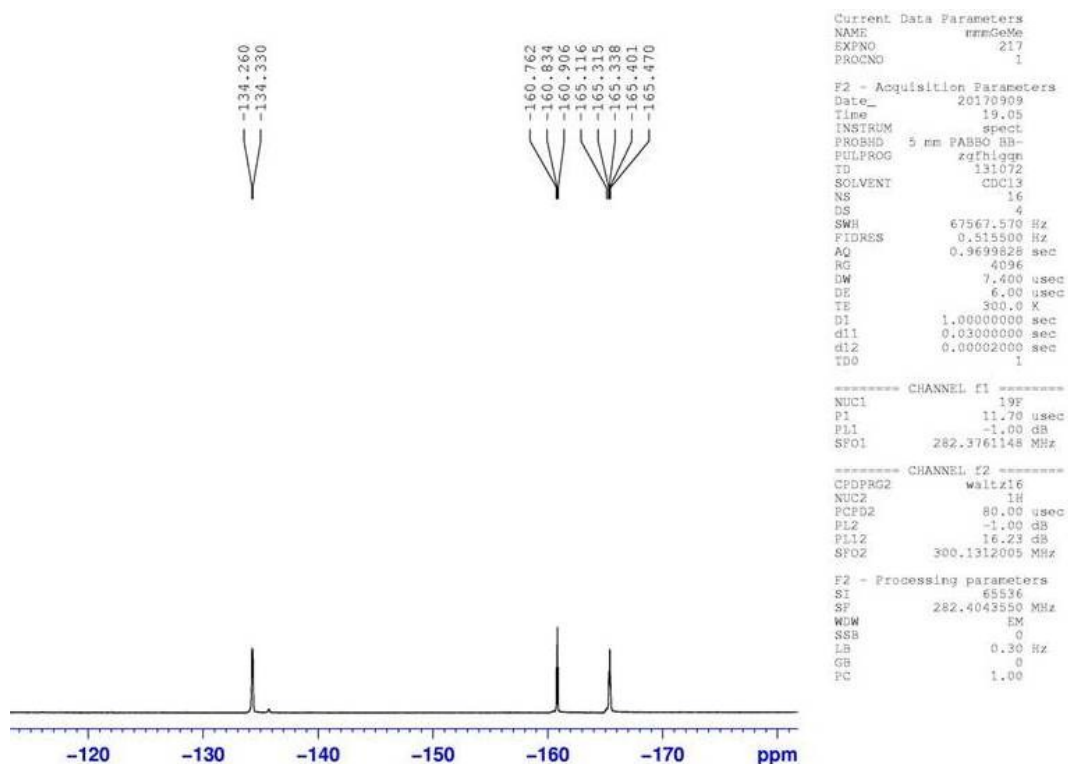

Figure S36.  $^{19}\text{F}$  NMR spectrum of compound **7** in  $\text{CDCl}_3$  at 300 K.

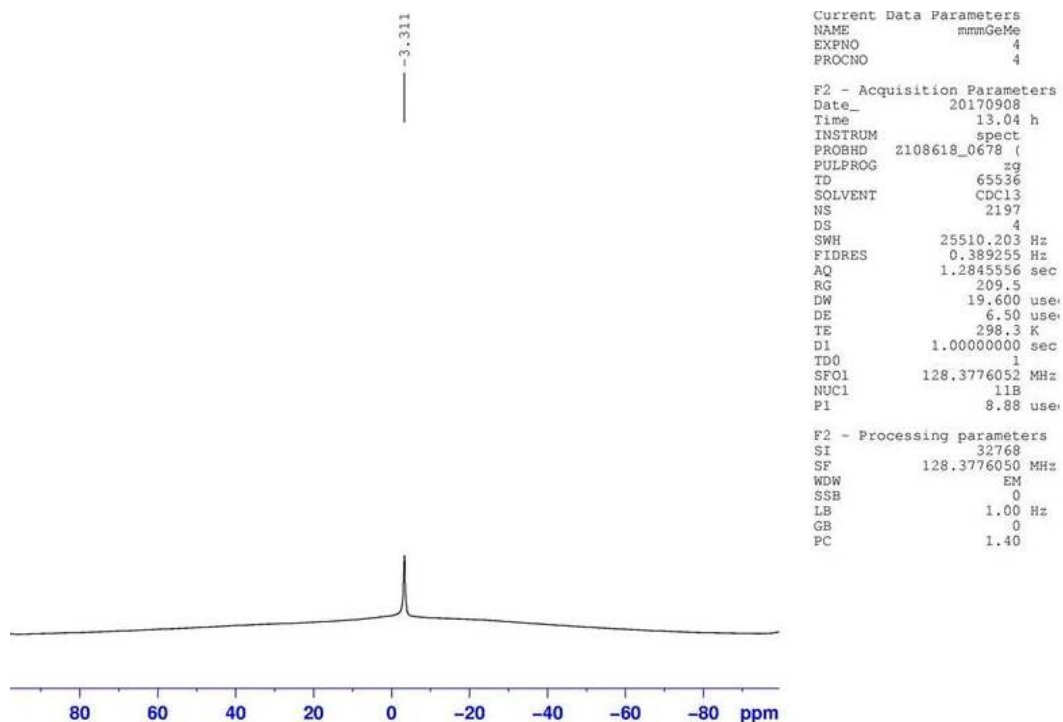

Figure S37.  $^{11}\text{B}$  NMR spectrum of compound **7** in  $\text{CDCl}_3$  at 300 K.

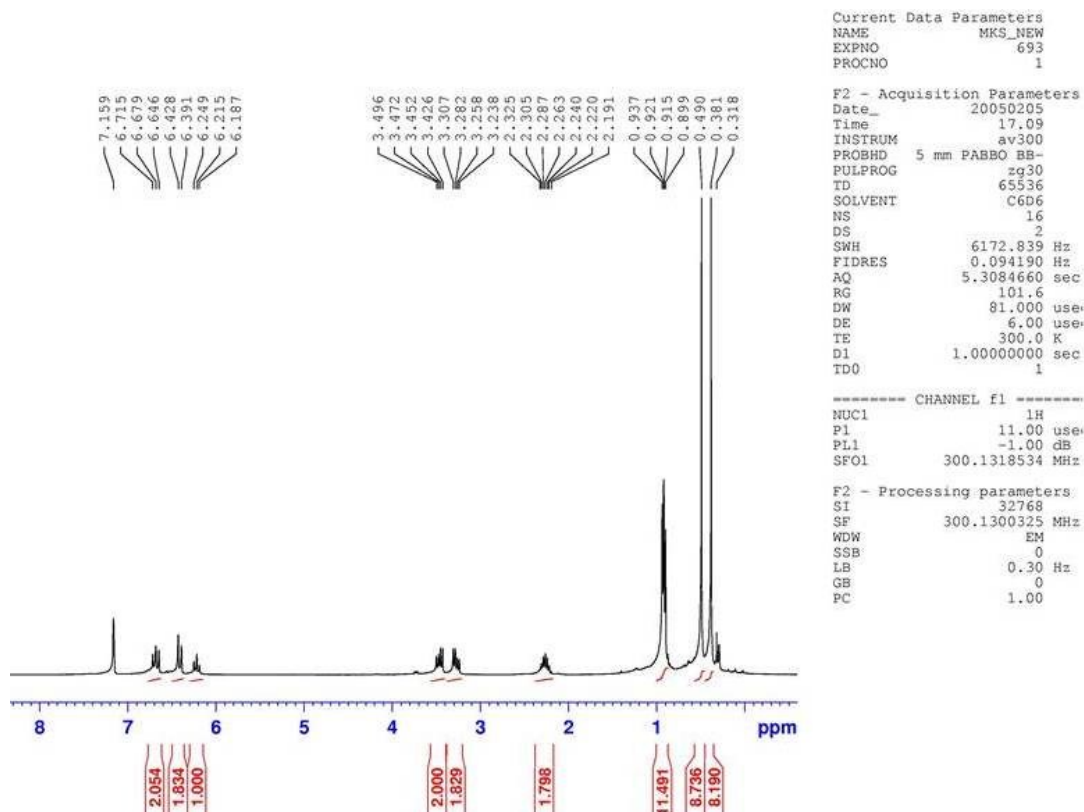

Figure S38.  $^1\text{H}$  NMR spectrum of compound **9** in  $\text{CDCl}_3$  at 300 K.



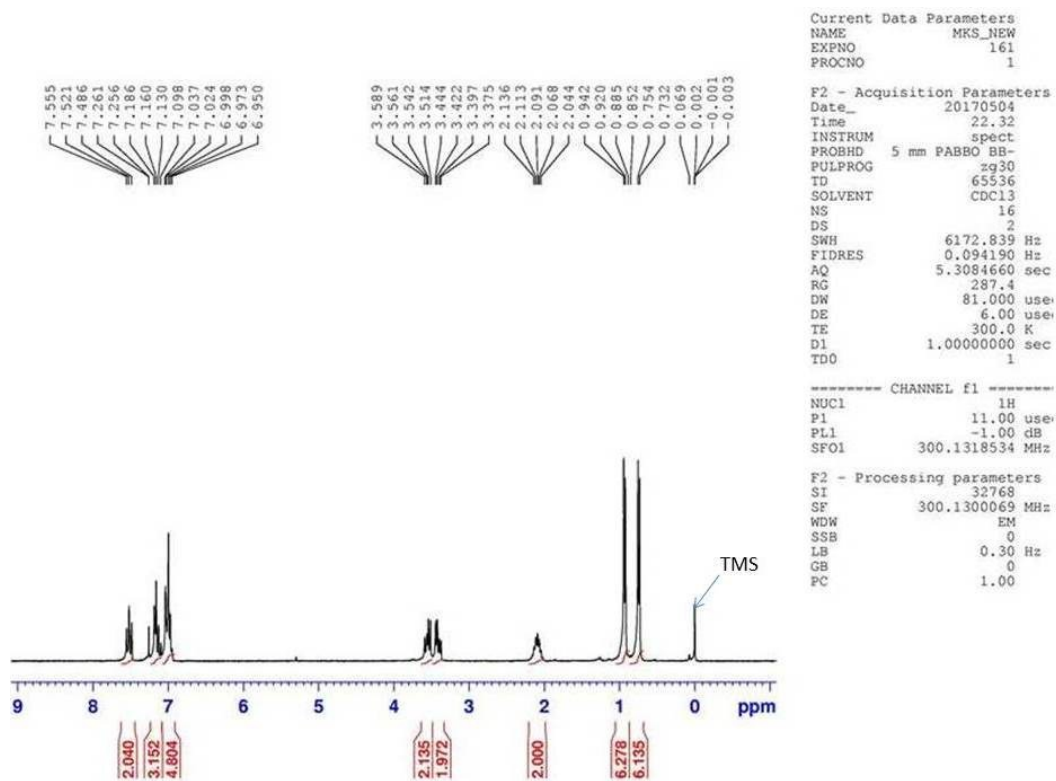

Figure S39. <sup>1</sup>H NMR spectrum of compound **10** in CDCl<sub>3</sub> at 300 K.

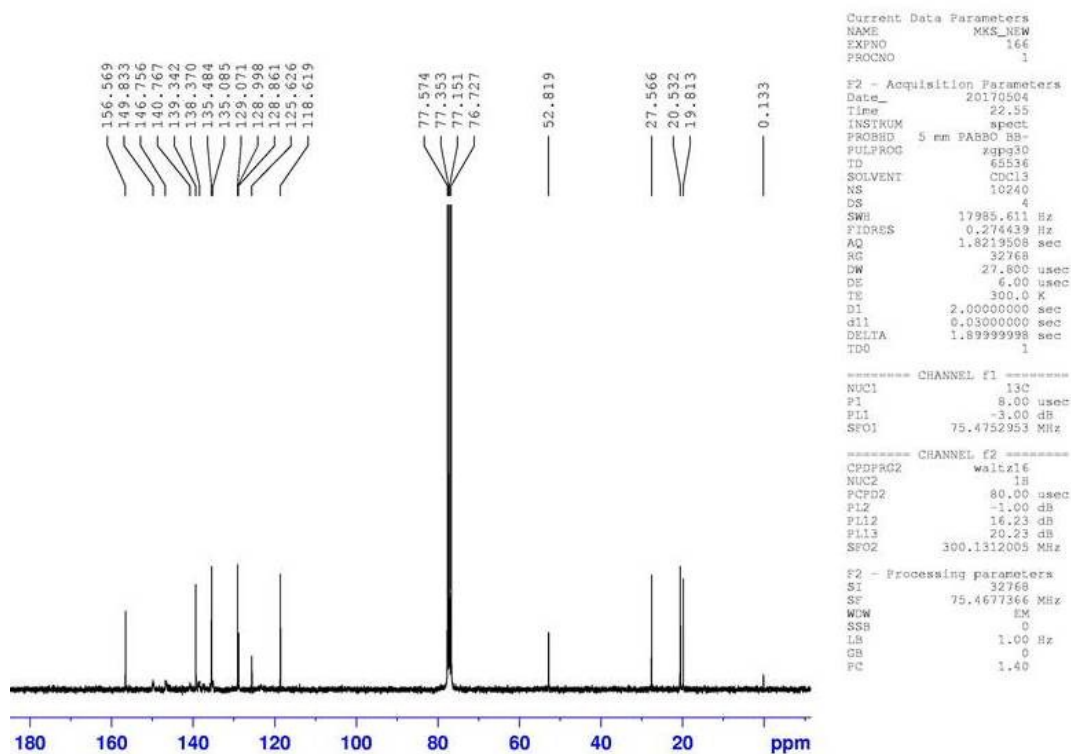

Figure S40. <sup>13</sup>C NMR spectrum of compound **10** in CDCl<sub>3</sub> at 300 K.

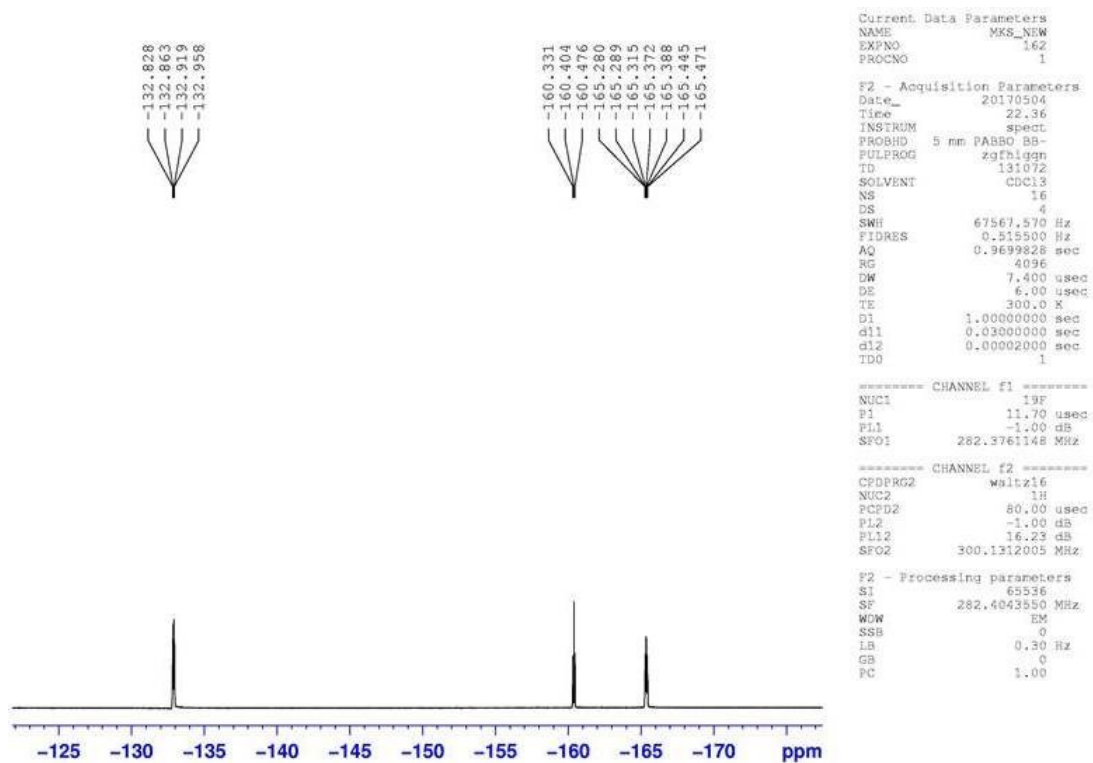

**Figure S41.**  $^{19}\text{F}$  NMR spectrum of compound **10** in  $\text{CDCl}_3$  at 300 K.

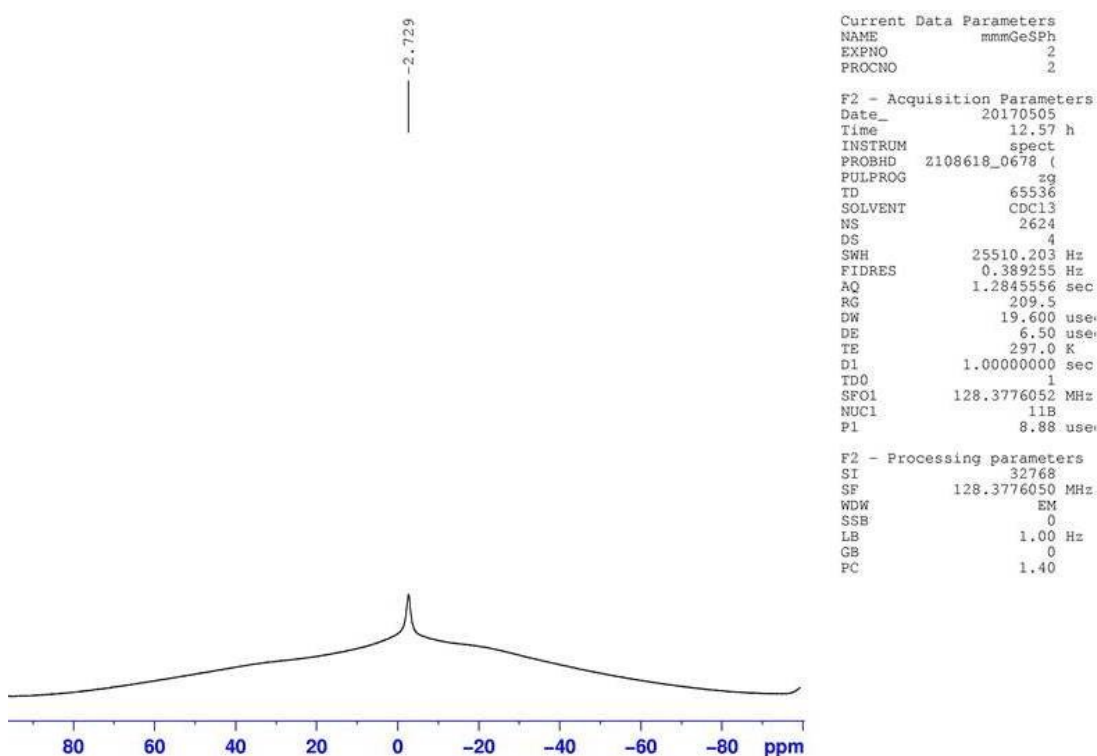

**Figure S42.**  $^{11}\text{B}$  NMR spectrum of compound **10** in  $\text{CDCl}_3$  at 300 K.



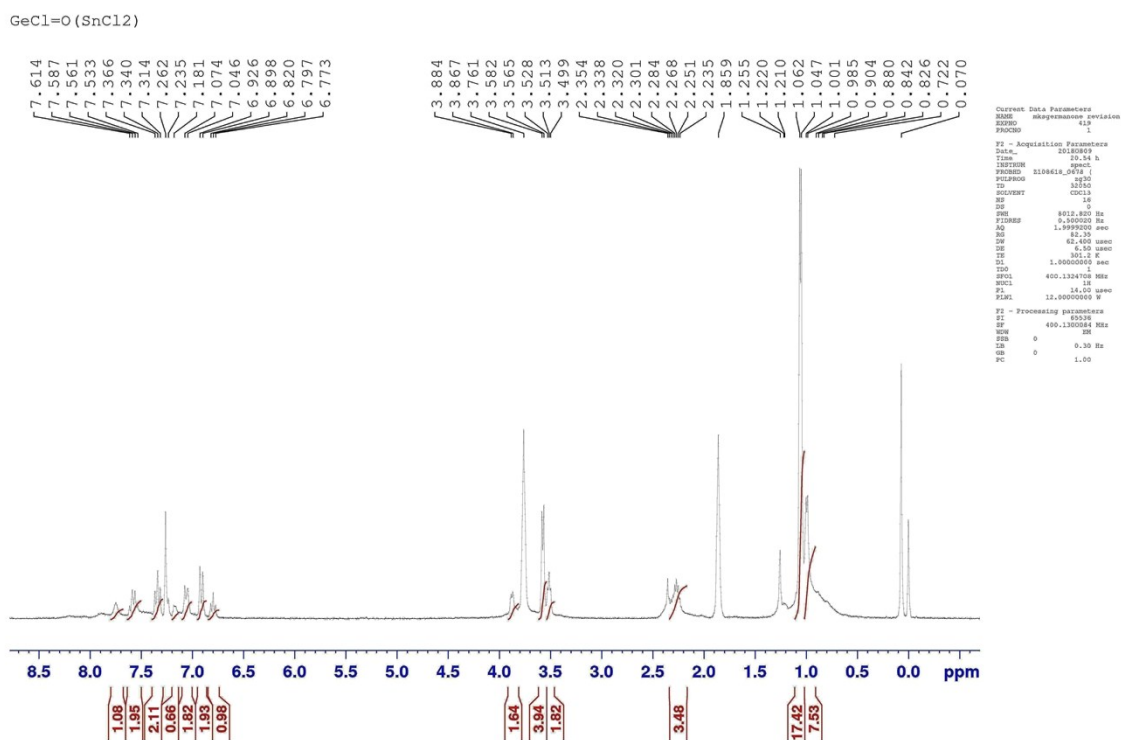

Figure S45. <sup>1</sup>H NMR spectrum of the product obtained from the reaction of D1 with SnCl<sub>2</sub>.

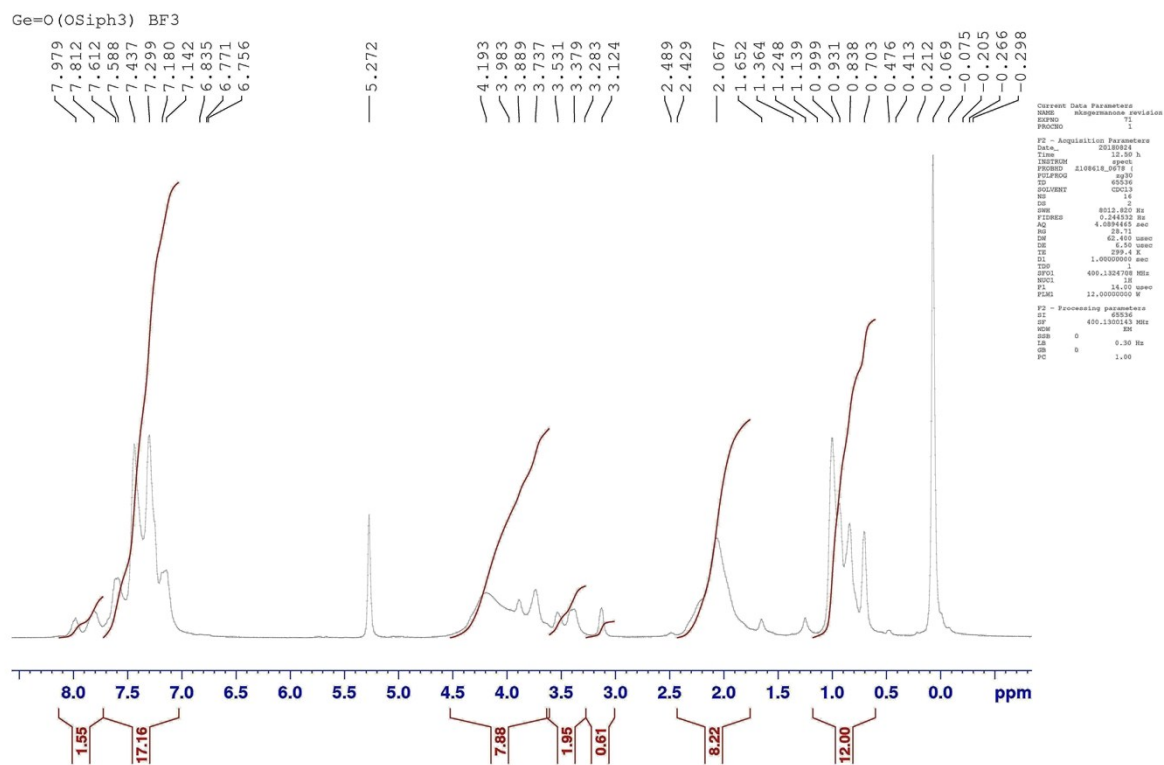

Figure S46. <sup>1</sup>H NMR spectrum of the product obtained from the reaction of D2 with BF<sub>3</sub>.

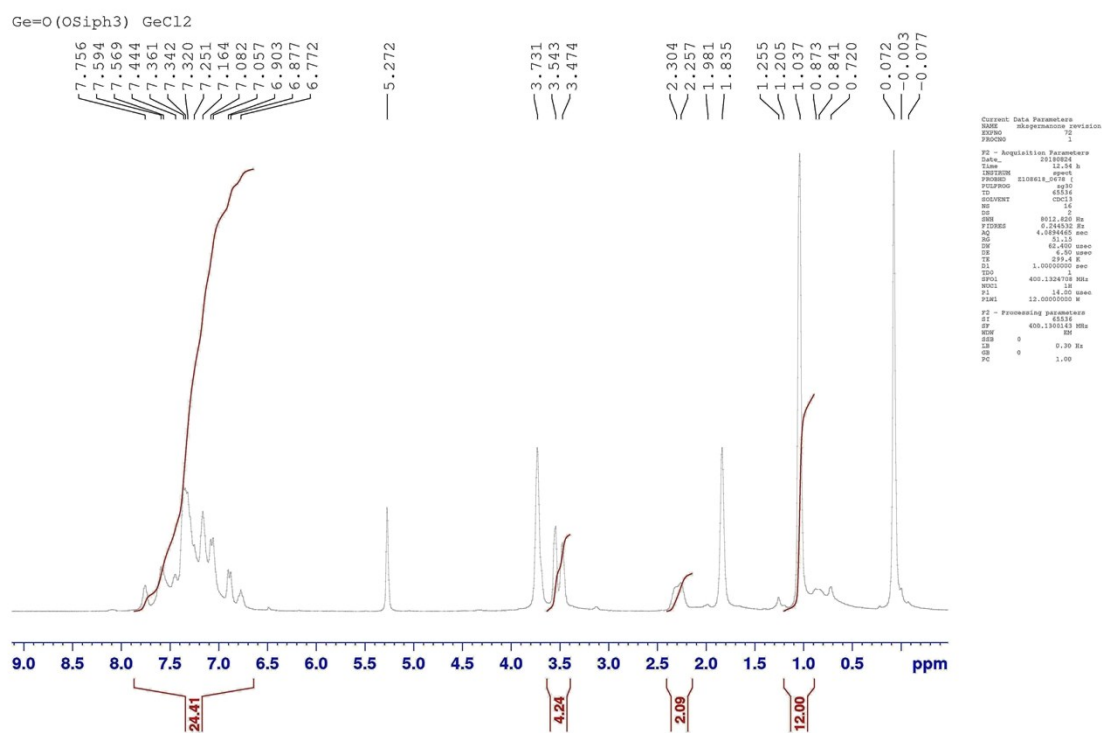

**Figure S47.**  $^1\text{H}$  NMR spectrum of the product obtained from the reaction of **D2** with  $\text{GeCl}_2$ .

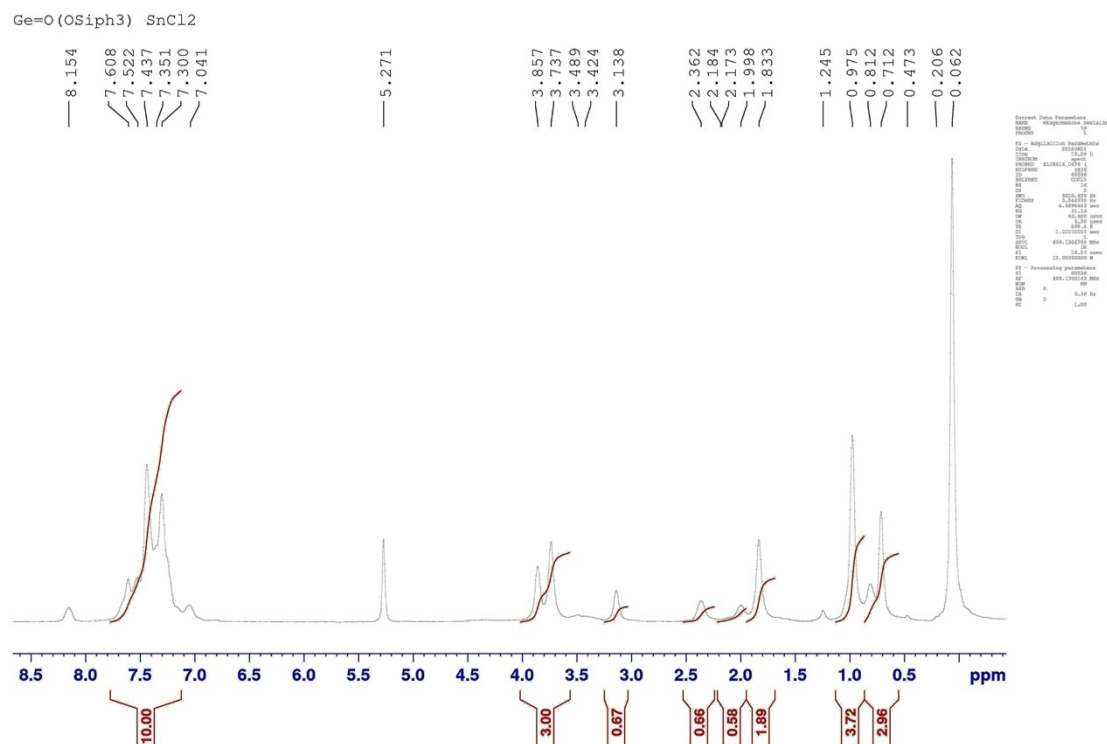

**Figure S48.**  $^1\text{H}$  NMR spectrum of the product obtained from the reaction of **D2** with  $\text{SnCl}_2$ .

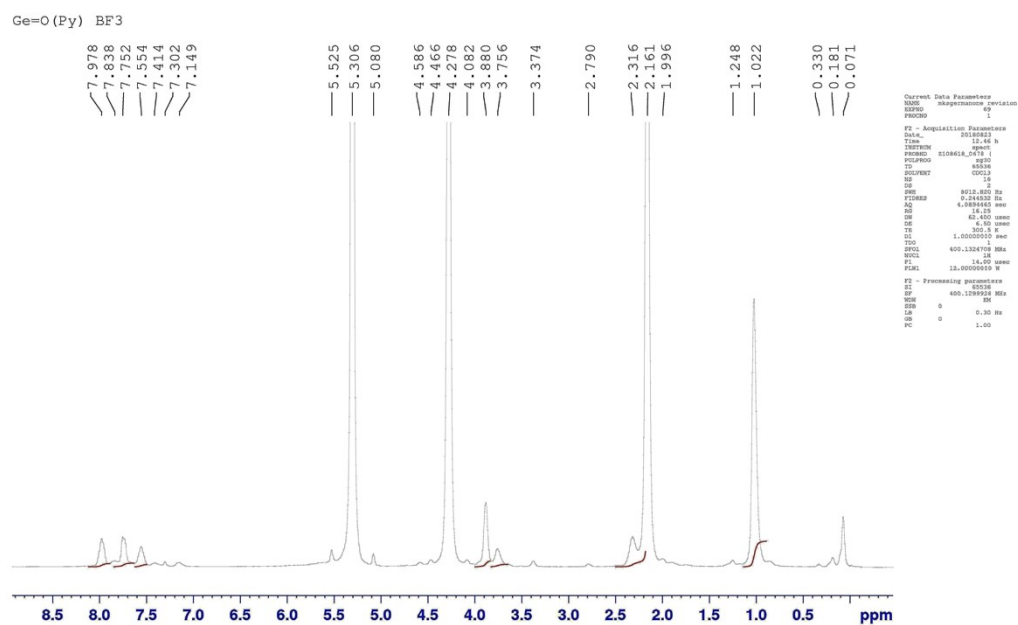

Figure S49. <sup>1</sup>H NMR spectrum of the product obtained from the reaction of **D5** with BF<sub>3</sub>.

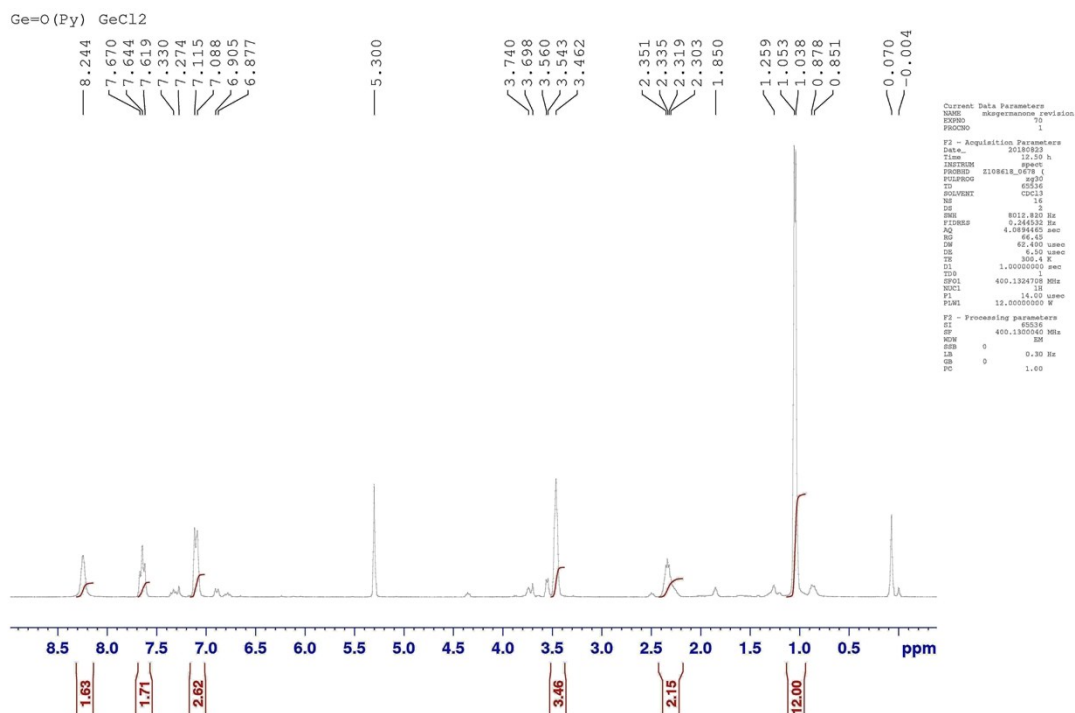

Figure S50. <sup>1</sup>H NMR spectrum of the product obtained from the reaction of **D5** with GeCl<sub>2</sub>.



## 4. UV-vis Spectra of Compounds 1, 2, and 10

**Table S1.** Observed and calculated transitions for compounds 1, 2, and 10.

| Compound 1                                                                |                                                   |                                           |                                     |
|---------------------------------------------------------------------------|---------------------------------------------------|-------------------------------------------|-------------------------------------|
| Transition                                                                | Origin of transition<br>(percentage contribution) | $\lambda_{\max}$ ( $\epsilon$ )<br>(obsd) | $\lambda_{\max}$ ( $f$ )<br>(calcd) |
| $\pi_{(C_6F_5)} \rightarrow \pi^*_{(ATI)}$                                | HOMO-1 $\rightarrow$ LUMO+1 (94)                  | 420 (10913)                               | 384.69<br>(0.0012)                  |
| $\pi_{(C_6F_5)} \rightarrow \pi^*_{(ATI)}$                                | HOMO $\rightarrow$ LUMO+1 (4)                     |                                           |                                     |
| $\pi_{(ATI)} \rightarrow \pi^*_{(ATI)}$                                   | HOMO-9 $\rightarrow$ LUMO (4)                     | 352 (10410)                               | 332.7<br>(0.1831)                   |
| $\sigma_{(C_6F_5)} + nb_{(O)} \rightarrow \pi^*_{(ATI)}$                  | HOMO-8 $\rightarrow$ LUMO (6)                     |                                           |                                     |
| $\sigma_{(C_6F_5)} + nb_{(O)} \rightarrow \pi^*_{(ATI)}$                  | HOMO-7 $\rightarrow$ LUMO (3)                     |                                           |                                     |
| $\pi_{(ATI)} \rightarrow \pi^*_{(ATI)}$                                   | HOMO-6 $\rightarrow$ LUMO+1 (85)                  |                                           |                                     |
| $\pi_{(ATI)} \rightarrow \pi^*_{(ATI)}$                                   | HOMO-9 $\rightarrow$ LUMO (45)                    | 285 (9926)                                | 248.46<br>(0.5505)                  |
| $\sigma_{(C_6F_5)} + nb_{(O)} \rightarrow \pi^*_{(ATI)}$                  | HOMO-8 $\rightarrow$ LUMO (16)                    |                                           |                                     |
| $\sigma_{(C_6F_5)} + nb_{(O)} \rightarrow \pi^*_{(ATI)}$                  | HOMO-7 $\rightarrow$ LUMO (3)                     |                                           |                                     |
| $\pi_{(ATI)} \rightarrow \pi^*_{(ATI)}$                                   | HOMO-6 $\rightarrow$ LUMO+1 (7)                   |                                           |                                     |
| $\pi_{(C_6F_5)} \rightarrow \sigma^*_{(Ge-Cl)}$                           | HOMO-6 $\rightarrow$ LUMO+2 (7)                   |                                           |                                     |
| $\pi_{(C_6F_5)} \rightarrow \sigma^*_{(Ge-Cl)}$                           | HOMO-5 $\rightarrow$ LUMO+2 (3)                   |                                           |                                     |
| $\pi_{(C_6F_5)} \rightarrow \sigma^*_{(Ge-Cl)}$                           | HOMO-4 $\rightarrow$ LUMO+2 (10)                  |                                           |                                     |
| Compound 2                                                                |                                                   |                                           |                                     |
| $\pi_{(C_6F_5)} \rightarrow \pi^*_{(ATI)}$                                | HOMO-4 $\rightarrow$ LUMO (18)                    | 420 (11236)                               | 381.49<br>(0.0084)                  |
| $\pi_{(C_6F_5)} \rightarrow \pi^*_{(ATI)}$                                | HOMO-3 $\rightarrow$ LUMO (10)                    |                                           |                                     |
| $\pi_{(C_6F_5)} \rightarrow \pi^*_{(ATI)}$                                | HOMO-1 $\rightarrow$ LUMO (48)                    |                                           |                                     |
| $\pi_{(C_6F_5)} \rightarrow \pi^*_{(ATI)}$                                | HOMO $\rightarrow$ LUMO (22)                      |                                           |                                     |
| $\sigma_{[B-C(C_6F_5)]} + nb_{(O)} \rightarrow \pi^*_{(ATI)}$             | HOMO-14 $\rightarrow$ LUMO (2)                    | 351 (10620)                               | 338.83<br>(0.0725)                  |
| $\pi_{(ATI)} + \pi_{(C_6F_5)} + \pi_{(C_6F_5)} \rightarrow \pi^*_{(ATI)}$ | HOMO-8 $\rightarrow$ LUMO+1 (11)                  |                                           |                                     |
| $\pi_{(C_6F_5)} \rightarrow \pi^*_{(ATI)}$                                | HOMO-7 $\rightarrow$ LUMO+1 (14)                  |                                           |                                     |
| $\pi_{(ATI)} + \pi_{(C_6F_5)} \rightarrow \pi^*_{(ATI)}$                  | HOMO-5 $\rightarrow$ LUMO (2)                     |                                           |                                     |
| $\pi_{(ATI)} + \pi_{(C_6F_5)} \rightarrow \pi^*_{(ATI)}$                  | HOMO-5 $\rightarrow$ LUMO+1 (35)                  |                                           |                                     |



|                                                                                                        |                                   |             |                    |
|--------------------------------------------------------------------------------------------------------|-----------------------------------|-------------|--------------------|
| $\pi_{(C_6F_5)} \rightarrow \pi^*_{(ATI)}$                                                             | HOMO-4 $\rightarrow$ LUMO+1 (6)   |             |                    |
| $\pi_{(C_6F_5)} \rightarrow \pi^*_{(ATI)}$                                                             | HOMO-3 $\rightarrow$ LUMO+1 (23)  |             |                    |
|                                                                                                        |                                   |             |                    |
| $\sigma_{(C_6F_5)} + \sigma_{[C-F(C_6F_5)]} + \sigma_{[Si-C(C_6F_5)]} \rightarrow \pi^*_{(ATI)}$       | HOMO-16 $\rightarrow$ LUMO (22)   | 285 (11186) | 249.32<br>(0.3625) |
| $\pi_{(ATI)} + \sigma_{[B-C(C_6F_5)]} \rightarrow \pi^*_{(ATI)}$                                       | HOMO-15 $\rightarrow$ LUMO (4)    |             |                    |
| $\pi_{(ATI)} + \sigma_{[B-C(C_6F_5)]} \rightarrow \pi^*_{(ATI)}$                                       | HOMO-15 $\rightarrow$ LUMO+1 (21) |             |                    |
| $\sigma_{[B-C(C_6F_5)]} + nb_{(O)} \rightarrow \pi^*_{(ATI)}$                                          | HOMO-14 $\rightarrow$ LUMO (34)   |             |                    |
| $\sigma_{[B-C(C_6F_5)]} + nb_{(O)} \rightarrow \pi^*_{(ATI)}$                                          | HOMO-14 $\rightarrow$ LUMO+1 (4)  |             |                    |
| $\sigma_{[B-C(C_6F_5)]} + nb_{(O)} + \pi_{(C_6F_5)} \rightarrow \pi^*_{(ATI)}$                         | HOMO-13 $\rightarrow$ LUMO (2)    |             |                    |
| $\pi_{(C_6F_5)} \rightarrow \pi^*_{(ATI)}$                                                             | HOMO-3 $\rightarrow$ LUMO+1 (3)   |             |                    |
| <b>Compound 10</b>                                                                                     |                                   |             |                    |
| $n_{(F)} + \pi_{(C_6F_5)} \rightarrow \pi^*_{(ATI)}$                                                   | HOMO $\rightarrow$ LUMO (99)      | 420 (12773) | 381.51<br>(0.0001) |
|                                                                                                        |                                   |             |                    |
| $n_{(F)} + \pi_{(C_6F_5)} \rightarrow \pi^*_{(ATI)}$                                                   | HOMO-4 $\rightarrow$ LUMO (26)    | --          | 369.88<br>(0.0708) |
| $n_{(F)} + \pi_{(C_6F_5)} \rightarrow \pi^*_{(ATI)}$                                                   | HOMO-3 $\rightarrow$ LUMO (3)     |             |                    |
| $n_{(F)} + \pi_{(C_6F_5)} \rightarrow \pi^*_{(ATI)}$                                                   | HOMO-2 $\rightarrow$ LUMO (14)    |             |                    |
| $n_{(F)} + \pi_{(C_6F_5)} \rightarrow \pi^*_{(ATI)}$                                                   | HOMO-1 $\rightarrow$ LUMO (52)    |             |                    |
|                                                                                                        |                                   |             |                    |
| $\sigma_{[B-C(C_6F_5)]} + \sigma_{[C-C(C_6F_5)]} + n_{(O)} + \pi_{(C_6F_5)} \rightarrow \pi^*_{(ATI)}$ | HOMO-11 $\rightarrow$ LUMO (5)    | 353 (14176) | 344.27<br>(0.1584) |
| $n_{(S)} + n_{(O)} + \sigma_{[B-C(C_6F_5)]} + \pi_{(C_6F_5)} \rightarrow \pi^*_{(ATI)}$                | HOMO-8 $\rightarrow$ LUMO (2)     |             |                    |
| $n_{(F)} + \pi_{(C_6F_5)} \rightarrow \pi^*_{(ATI)}$                                                   | HOMO-5 $\rightarrow$ LUMO+1 (4)   |             |                    |
| $n_{(F)} + \pi_{(C_6F_5)} \rightarrow \pi^*_{(ATI)}$                                                   | HOMO-4 $\rightarrow$ LUMO+1 (84)  |             |                    |
|                                                                                                        |                                   |             |                    |
| $\pi_{(ATI)} \rightarrow \pi^*_{(ATI)}$                                                                | HOMO-12 $\rightarrow$ LUMO (4)    | 287 (28993) | 250.24<br>(0.4643) |

**Figure S52.** UV-vis spectra (calculated through DFT analysis) of compounds **1** (a), **2** (b), and **10** (c).

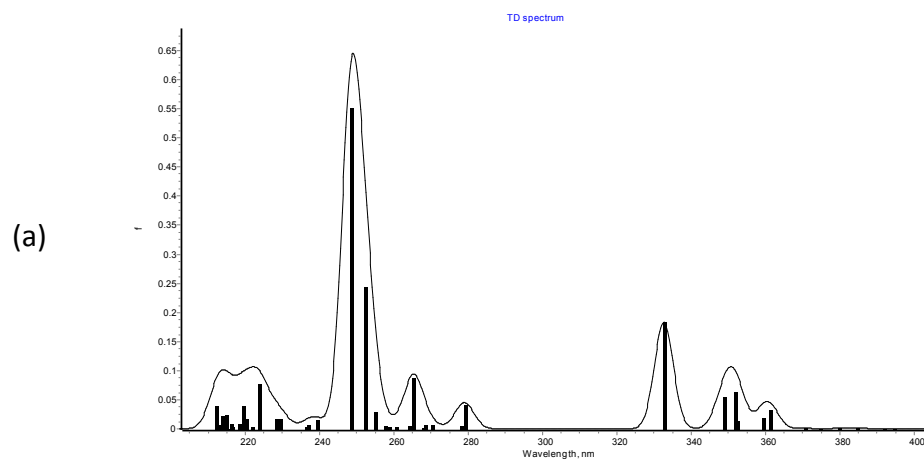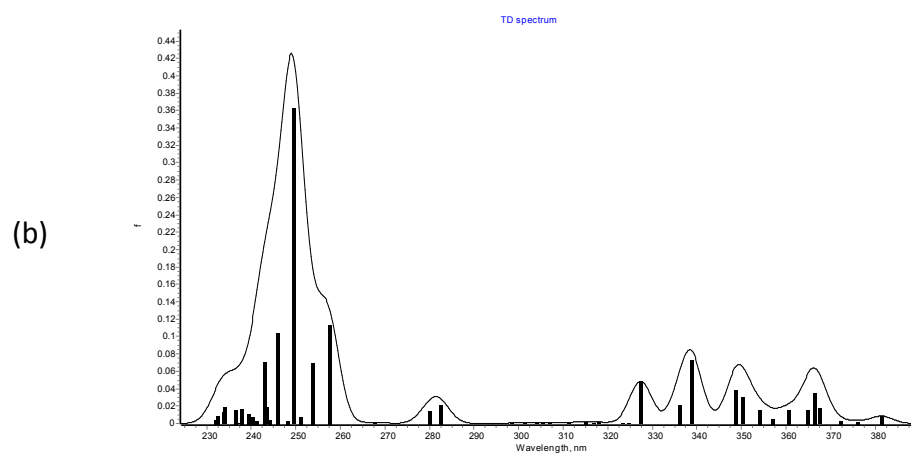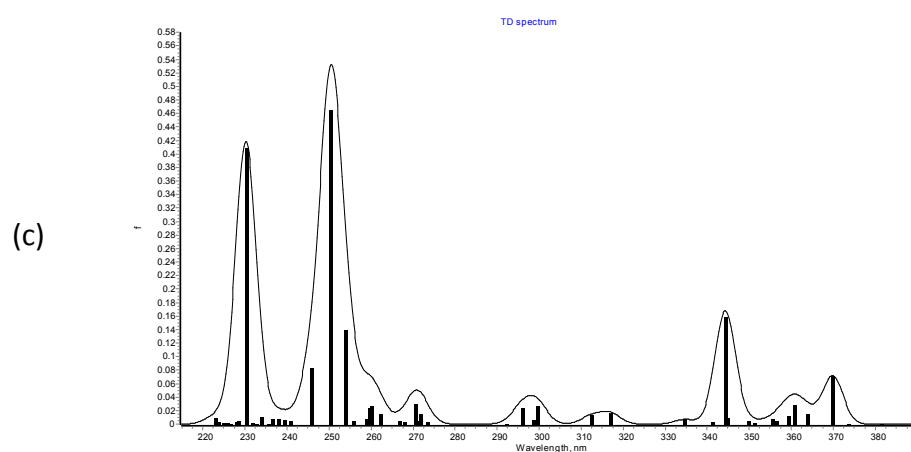

## 5. Molecular Structure Determination of Compounds **D1**, **D3-D5**, **1-7**, **9**, and **10**

Single crystal X-ray diffraction data for compounds **D1**, **D3-D5**, **1-7**, **9**, and **10** were collected using a Bruker SMART APEX diffractometer equipped with a 3-axis goniometer (Tables S2-S5).<sup>S4</sup> The crystals were covered with Paratone-N and mounted on a glass capillary. The data were collected either at room temperatures or at a low temperature (under a steady flow of cold dinitrogen) using Mo K $\alpha$  radiation ( $\lambda = 0.71073 \text{ \AA}$ ). Integration of data was performed using SAINT. Empirical absorption correction was applied using SADABS.<sup>S5</sup> Structure solutions were accomplished by direct methods and refined by full matrix least-squares on  $F^2$  using either SHELXTL<sup>S6</sup> or SHELXL-2013 incorporated in OLEX2.<sup>S7</sup> All non-hydrogen atoms were refined anisotropically. The positions of hydrogen atoms were fixed according to a riding model and were refined isotropically. In compound **4**, a solvent molecule (dichloromethane) is disordered. In compound **9**, large regions of diffused electron density that could not be modelled (disordered solvents) were removed from the refinement using SQUEEZE function in PLATON.

**Table S2.** Crystal data and structure refinement parameters for compounds **D1** and **D3-D5**.

|                                          | <b>D1</b>                                                                                                                               | <b>D3</b>                                                                     | <b>D4</b>                                                                                                                                 | <b>D5</b>                                                                     |
|------------------------------------------|-----------------------------------------------------------------------------------------------------------------------------------------|-------------------------------------------------------------------------------|-------------------------------------------------------------------------------------------------------------------------------------------|-------------------------------------------------------------------------------|
| Empirical formula                        | C <sub>30</sub> H <sub>46</sub> Cl <sub>2</sub> Ge <sub>2</sub> N <sub>4</sub> O <sub>2</sub>                                           | C <sub>42</sub> H <sub>58</sub> Ge <sub>2</sub> N <sub>6</sub> O <sub>2</sub> | C <sub>44</sub> H <sub>62</sub> Ge <sub>2</sub> N <sub>6</sub> O <sub>2</sub>                                                             | C <sub>52</sub> H <sub>70</sub> Ge <sub>2</sub> N <sub>6</sub> O <sub>2</sub> |
| Formula weight                           | 710.83                                                                                                                                  | 824.16                                                                        | 852.22                                                                                                                                    | 956.36                                                                        |
| Temperature, K                           | 293(2)                                                                                                                                  | 293(2)                                                                        | 293(2)                                                                                                                                    | 273(2)                                                                        |
| Wavelength, Å                            | 0.71073                                                                                                                                 | 0.71073                                                                       | 0.71073                                                                                                                                   | 0.71073                                                                       |
| Crystal system                           | Triclinic                                                                                                                               | Monoclinic                                                                    | Triclinic                                                                                                                                 | Monoclinic                                                                    |
| Space group                              | <i>P</i> $\bar{1}$                                                                                                                      | <i>P</i> 2 <sub>1</sub> /n                                                    | <i>P</i> $\bar{1}$                                                                                                                        | <i>P</i> 2 <sub>1</sub> /n                                                    |
| Unit cell dimensions                     | a = 8.2234(14) Å<br>b = 10.4654(17) Å<br>c = 11.0901(19) Å<br>$\alpha$ = 105.331(3)°<br>$\beta$ = 105.474(3)°<br>$\gamma$ = 104.265(3)° | a = 9.571(4) Å<br>b = 13.665(7) Å<br>c = 15.943(7) Å<br>$\beta$ = 91.027(14)° | a = 12.9207(10) Å<br>b = 12.9316(11) Å<br>c = 14.5928(12) Å<br>$\alpha$ = 69.9910(10)°<br>$\beta$ = 89.472(2)°<br>$\gamma$ = 71.2250(10)° | a = 10.595(4) Å<br>b = 15.635(5) Å<br>c = 14.875(5) Å<br>$\beta$ = 92.261(6)° |
| Volume, Å <sup>3</sup>                   | 833.9(2)                                                                                                                                | 2084.7(16)                                                                    | 2155.2(3)                                                                                                                                 | 2462.1(14)                                                                    |
| Z                                        | 1                                                                                                                                       | 2                                                                             | 2                                                                                                                                         | 2                                                                             |
| Density (calculated), g/cm <sup>3</sup>  | 1.416                                                                                                                                   | 1.313                                                                         | 1.313                                                                                                                                     | 1.290                                                                         |
| Absorption coefficient, mm <sup>-1</sup> | 1.995                                                                                                                                   | 1.483                                                                         | 1.437                                                                                                                                     | 1.266                                                                         |
| <i>F</i> (000)                           | 368.0                                                                                                                                   | 864.0                                                                         | 1140                                                                                                                                      | 1008.0                                                                        |
| Crystal size, mm <sup>3</sup>            | 0.421 x 0.413 x 0.380                                                                                                                   | 0.350 x 0.265 x 0.157                                                         | 0.350 x 0.255 x 0.159                                                                                                                     | 0.431 x 0.403 x 0.390                                                         |
| $\theta$ range for data collection, °    | 2.15 to 25.00                                                                                                                           | 1.96 to 25.00                                                                 | 1.49 to 25.00                                                                                                                             | 1.89 to 25.00                                                                 |

|                                                 |                                                                 |                                                                  |                                                                   |                                                                   |
|-------------------------------------------------|-----------------------------------------------------------------|------------------------------------------------------------------|-------------------------------------------------------------------|-------------------------------------------------------------------|
| Limiting indices                                | $-9 \leq h \leq 9, -12 \leq k \leq 10,$<br>$-13 \leq l \leq 11$ | $-11 \leq h \leq 10, -16 \leq k \leq$<br>$6, -15 \leq l \leq 17$ | $-15 \leq h \leq 10, -15 \leq k \leq$<br>$15, -17 \leq l \leq 17$ | $-12 \leq h \leq 12, -18 \leq k \leq$<br>$10, -15 \leq l \leq 17$ |
| Reflections collected                           | 4407                                                            | 4960                                                             | 11344                                                             | 10217                                                             |
| Independent reflections                         | 2943 [ $R_{\text{int}} = 0.0208$ ]                              | 3667 [ $R_{\text{int}} = 0.0270$ ]                               | 7473 [ $R_{\text{int}} = 0.0165$ ]                                | 4312 [ $R_{\text{int}} = 0.0578$ ]                                |
| Absorption correction                           | Semi-empirical from equivalents                                 | Semi-empirical from equivalents                                  | Semi-empirical from equivalents                                   | Semi-empirical from equivalents                                   |
| Refinement method                               | Full-matrix least-squares on $F^2$                              | Full-matrix least-squares on $F^2$                               | Full-matrix least-squares on $F^2$                                | Full-matrix least-squares on $F^2$                                |
| Data /restraints/ parameter                     | 2892 / 0 / 185                                                  | 2853 / 0 / 239                                                   | 7473 / 0 / 497                                                    | 4312 / 0 / 285                                                    |
| Goodness-of-fit on $F^2$                        | 1.049                                                           | 1.122                                                            | 1.110                                                             | 0.937                                                             |
| Final $R$ indices [ $I > 2\sigma(I)$ ]          | $R_1 = 0.0316, wR_2 = 0.0776$                                   | $R_1 = 0.0554, wR_2 = 0.1524$                                    | $R_1 = 0.0289, wR_2 = 0.0807$                                     | $R_1 = 0.0454, wR_2 = 0.0923$                                     |
| $R$ indices (all data)                          | $R_1 = 0.0360, wR_2 = 0.0798$                                   | $R_1 = 0.0791, wR_2 = 0.1912$                                    | $R_1 = 0.0349, wR_2 = 0.0943$                                     | $R_1 = 0.0700, wR_2 = 0.0992$                                     |
| Largest diff. peak and hole, $e\text{\AA}^{-3}$ | 0.300 and -0.415                                                | 0.626 and -0.870                                                 | 0.425 and -0.327                                                  | 0.604 and -0.401                                                  |

**Table S3.** Crystal data and structure refinement parameters for compounds **1**, **2**, **3**, and **4**.

|                                          | <b>1</b>                                                                                                                          | <b>2</b>                                                                                                                                | <b>3</b>                                                                                                                          | <b>4</b>                                                                                                                              |
|------------------------------------------|-----------------------------------------------------------------------------------------------------------------------------------|-----------------------------------------------------------------------------------------------------------------------------------------|-----------------------------------------------------------------------------------------------------------------------------------|---------------------------------------------------------------------------------------------------------------------------------------|
| Empirical formula                        | C <sub>33</sub> H <sub>23</sub> BClF <sub>15</sub> GeN <sub>2</sub> O·CH <sub>2</sub> Cl <sub>2</sub>                             | C <sub>51</sub> H <sub>38</sub> BF <sub>15</sub> GeN <sub>2</sub> O <sub>2</sub> Si                                                     | C <sub>37</sub> H <sub>27</sub> BF <sub>15</sub> GeN <sub>3</sub> O·CH <sub>2</sub> Cl <sub>2</sub>                               | C <sub>42</sub> H <sub>30</sub> BClF <sub>15</sub> GeN <sub>2</sub> O                                                                 |
| Formula weight                           | 952.33                                                                                                                            | 1107.35                                                                                                                                 | 982.96                                                                                                                            | 982.55                                                                                                                                |
| Temperature, K                           | 100(2)                                                                                                                            | 100(2)                                                                                                                                  | 100(2)                                                                                                                            | 100(2)                                                                                                                                |
| Wavelength, Å                            | 0.71073                                                                                                                           | 0.71073                                                                                                                                 | 0.71073                                                                                                                           | 0.71073                                                                                                                               |
| Crystal system                           | Triclinic                                                                                                                         | Triclinic                                                                                                                               | Triclinic                                                                                                                         | Triclinic                                                                                                                             |
| Space group                              | $P\bar{1}$                                                                                                                        | $P\bar{1}$                                                                                                                              | $P\bar{1}$                                                                                                                        | $P\bar{1}$                                                                                                                            |
| Unit cell dimensions                     | a = 11.7309(18) Å<br>b = 13.344(2) Å<br>c = 13.627(2) Å<br>$\alpha$ = 62.827(3)°<br>$\beta$ = 73.967(3)°<br>$\gamma$ = 81.201(3)° | a = 11.6250(11) Å<br>b = 15.0956(14) Å<br>c = 15.2052(14) Å<br>$\alpha$ = 82.564(2)°<br>$\beta$ = 69.443(2)°<br>$\gamma$ = 69.8390(10)° | a = 12.436(2) Å<br>b = 12.462(2) Å<br>c = 15.186(3) Å<br>$\alpha$ = 106.723(4)°<br>$\beta$ = 96.368(3)°<br>$\gamma$ = 115.028(3)° | a = 11.7566(13) Å<br>b = 13.7449(15) Å<br>c = 13.7689(15) Å<br>$\alpha$ = 65.642(3)°<br>$\beta$ = 74.276(3)°<br>$\gamma$ = 74.609(3)° |
| Volume, Å <sup>3</sup>                   | 1823.0(5)                                                                                                                         | 2345.2(4)                                                                                                                               | 1967.6(6)                                                                                                                         | 1920.9(4)                                                                                                                             |
| Z                                        | 2                                                                                                                                 | 2                                                                                                                                       | 2                                                                                                                                 | 2                                                                                                                                     |
| Density (calculated), g/cm <sup>3</sup>  | 1.735                                                                                                                             | 1.568                                                                                                                                   | 1.659                                                                                                                             | 1.699                                                                                                                                 |
| Absorption coefficient, mm <sup>-1</sup> | 1.171                                                                                                                             | 0.783                                                                                                                                   | 1.023                                                                                                                             | 0.980                                                                                                                                 |
| F(000)                                   | 948                                                                                                                               | 1120.0                                                                                                                                  | 984.0                                                                                                                             | 986.0                                                                                                                                 |
| Crystal size, mm <sup>3</sup>            | 0.421 x 0.413 x 0.381                                                                                                             | 0.421 x 0.403 x 0.380                                                                                                                   | 0.451 x 0.443 x 0.410                                                                                                             | 0.18 x 0.16 x 0.13                                                                                                                    |
| $\theta$ range for data                  | 1.73 to 24.99                                                                                                                     | 1.43 to 25.00                                                                                                                           | 1.45 to 25.00                                                                                                                     | 1.828 to 26.679                                                                                                                       |

|                                                 |                                                                   |                                                                  |                                                                   |                                                                   |
|-------------------------------------------------|-------------------------------------------------------------------|------------------------------------------------------------------|-------------------------------------------------------------------|-------------------------------------------------------------------|
| collection, °                                   |                                                                   |                                                                  |                                                                   |                                                                   |
| Limiting indices                                | $-13 \leq h \leq 13, -15 \leq k \leq 15,$<br>$-16 \leq l \leq 14$ | $-13 \leq h \leq 13, -17 \leq k$<br>$\leq 17, -18 \leq l \leq 9$ | $-14 \leq h \leq 14, -13 \leq k \leq$<br>$14, -14 \leq l \leq 18$ | $-14 \leq h \leq 14, -17 \leq k \leq$<br>$17, -17 \leq l \leq 17$ |
| Reflections collected                           | 9590                                                              | 12248                                                            | 9788                                                              | 34134                                                             |
| Independent reflections                         | 6318 [ $R_{\text{int}} = 0.0265$ ]                                | 8104 [ $R_{\text{int}} =$<br>0.0168]                             | 6771 [ $R_{\text{int}} = 0.0363$ ]                                | 8074 [ $R_{\text{int}} = 0.1800$ ]                                |
| Absorption correction                           | Semi-empirical from equivalents                                   | Semi-empirical from equivalents                                  | Semi-empirical from equivalents                                   | Semi-empirical from equivalents                                   |
| Refinement method                               | Full-matrix least-squares on $F^2$                                | Full-matrix least-squares on $F^2$                               | Full-matrix least-squares on $F^2$                                | Full-matrix least-squares on $F^2$                                |
| Data /restraints/ parameter                     | 6318 / 0 / 518                                                    | 8104 / 0 / 662                                                   | 6771 / 0 / 554                                                    | 8074 / 0 / 572                                                    |
| Goodness-of-fit on $F^2$                        | 1.088                                                             | 1.189                                                            | 0.974                                                             | 1.053                                                             |
| Final $R$ indices [ $I > 2\sigma(I)$ ]          | $R_1 = 0.0463, wR_2 = 0.1182$                                     | $R_1 = 0.0332, wR_2 =$<br>0.0969                                 | $R_1 = 0.0560, wR_2 =$<br>0.1319                                  | $R_1 = 0.0517, wR_2 =$<br>0.1220                                  |
| $R$ indices (all data)                          | $R_1 = 0.0580, wR_2 = 0.1384$                                     | $R_1 = 0.0389, wR_2 =$<br>0.1169                                 | $R_1 = 0.0897, wR_2 =$<br>0.1500                                  | $R_1 = 0.0643, wR_2 =$<br>0.1307                                  |
| Largest diff. peak and hole, $e\text{\AA}^{-3}$ | 0.704 and -0.641                                                  | 0.653 and -0.512                                                 | 1.136 and -0.759                                                  | 0.889 and -1.407                                                  |

**Table S4.** Crystal data and structure refinement parameters for compounds **5-7**, and **10**.

|                                          | <b>5</b>                                                                                             | <b>6</b>                                                                                                                                                | <b>7</b>                                                                            | <b>10</b>                                                                                            |
|------------------------------------------|------------------------------------------------------------------------------------------------------|---------------------------------------------------------------------------------------------------------------------------------------------------------|-------------------------------------------------------------------------------------|------------------------------------------------------------------------------------------------------|
| Empirical formula                        | C <sub>37</sub> H <sub>32</sub> BF <sub>15</sub> GeN <sub>2</sub> O <sub>2</sub>                     | C <sub>40</sub> H <sub>30</sub> BCl <sub>2</sub> F <sub>15</sub> GeN <sub>2</sub> O                                                                     | C <sub>35</sub> H <sub>28</sub> BCl <sub>2</sub> F <sub>15</sub> GeN <sub>2</sub> O | C <sub>39</sub> H <sub>28</sub> BF <sub>15</sub> GeN <sub>2</sub> OS                                 |
| Formula weight                           | 905.07                                                                                               | 993.98                                                                                                                                                  | 931.91                                                                              | 941.11                                                                                               |
| Temperature, K                           | 100(2)                                                                                               | 100(2)                                                                                                                                                  | 100(2)                                                                              | 100(2)                                                                                               |
| Wavelength, Å                            | 0.71073                                                                                              | 0.71073                                                                                                                                                 | 0.71073                                                                             | 0.71073                                                                                              |
| Crystal system                           | Monoclinic                                                                                           | Triclinic                                                                                                                                               | Orthorhombic                                                                        | Monoclinic                                                                                           |
| Space group                              | <i>P</i> 2 <sub>1</sub> / <i>n</i>                                                                   | <i>P</i> $\bar{1}$                                                                                                                                      | <i>P</i> 2 <sub>1</sub> 2 <sub>1</sub> 2 <sub>1</sub>                               | <i>P</i> 2 <sub>1</sub> / <i>c</i>                                                                   |
| Unit cell dimensions                     | <i>a</i> = 11.415(3) Å<br><i>b</i> = 38.762(14) Å<br><i>c</i> = 17.556(6) Å<br><i>β</i> = 96.277(8)° | <i>a</i> = 12.501(3) Å<br><i>b</i> = 12.739(3) Å<br><i>c</i> = 15.229(4) Å<br><i>α</i> = 97.161(8)°<br><i>β</i> = 106.180(8)°<br><i>γ</i> = 115.904(7)° | <i>a</i> = 12.1298(9) Å<br><i>b</i> = 15.8356(12) Å<br><i>c</i> = 19.4206(15) Å     | <i>a</i> = 15.032(14) Å<br><i>b</i> = 11.229(12) Å<br><i>c</i> = 23.30(2) Å<br><i>β</i> = 104.94(4)° |
| Volume, Å <sup>3</sup>                   | 7722(4)                                                                                              | 2008.1(8)                                                                                                                                               | 3730.4(5)                                                                           | 3800(6)                                                                                              |
| <i>Z</i>                                 | 8                                                                                                    | 2                                                                                                                                                       | 4                                                                                   | 4                                                                                                    |
| Density (calculated), g/cm <sup>3</sup>  | 1.557                                                                                                | 1.644                                                                                                                                                   | 1.659                                                                               | 1.645                                                                                                |
| Absorption coefficient, mm <sup>-1</sup> | 0.902                                                                                                | 1.002                                                                                                                                                   | 1.073                                                                               | 0.971                                                                                                |
| <i>F</i> (000)                           | 3648.0                                                                                               | 996.0                                                                                                                                                   | 1864.0                                                                              | 3032                                                                                                 |
| Crystal size, mm <sup>3</sup>            | 0.20 x 0.18 x 0.17                                                                                   | 0.20 x 0.15 x 0.13                                                                                                                                      | 0.18 x 0.17 x 0.14                                                                  | 0.471 x 0.433 x 0.380                                                                                |
| <i>θ</i> range for data collection, °    | 1.961 to 28.355                                                                                      | 1.915 to 26.776                                                                                                                                         | 2.361 to 28.563                                                                     | 1.81 to 24.99°                                                                                       |



|                                                 |                                                              |                                                              |                                                              |                                                              |
|-------------------------------------------------|--------------------------------------------------------------|--------------------------------------------------------------|--------------------------------------------------------------|--------------------------------------------------------------|
| Limiting indices                                | $-15 \leq h \leq 15, -51 \leq k \leq 51, -23 \leq l \leq 23$ | $-15 \leq h \leq 15, -16 \leq k \leq 16, -19 \leq l \leq 19$ | $-10 \leq h \leq 16, -20 \leq k \leq 21, -26 \leq l \leq 24$ | $-17 \leq h \leq 17, -13 \leq k \leq 13, -27 \leq l \leq 27$ |
| Reflections collected                           | 253267                                                       | 60329                                                        | 34274                                                        | 39248                                                        |
| Independent reflections                         | 19194 [ $R_{\text{int}} = 0.1875$ ]                          | 8483 [ $R_{\text{int}} = 0.1897$ ]                           | 9489 [ $R_{\text{int}} = 0.1125$ ]                           | 6692 [ $R_{\text{int}} = 0.0732$ ]                           |
| Absorption correction                           | Semi-empirical from equivalents                              | Semi-empirical from equivalents                              | Semi-empirical from equivalents                              | Semi-empirical from equivalents                              |
| Refinement method                               | Full-matrix least-squares on $F^2$                           |
| Data /restraints/ parameter                     | 19194 / 0 / 1059                                             | 8483 / 0 / 563                                               | 9489 / 0 / 519                                               | 6692 / 0 / 545                                               |
| Goodness-of-fit on $F^2$                        | 1.047                                                        | 0.824                                                        | 1.069                                                        | 1.080                                                        |
| Final $R$ indices [ $I > 2\sigma(I)$ ]          | $R_1 = 0.0560, wR_2 = 0.0962$                                | $R_1 = 0.0434, wR_2 = 0.1120$                                | $R_1 = 0.0373, wR_2 = 0.0892$                                | $R_1 = 0.0493, wR_2 = 0.1164$                                |
| $R$ indices (all data)                          | $R_1 = 0.1042, wR_2 = 0.1068$                                | $R_1 = 0.0498, wR_2 = 0.1187$                                | $R_1 = 0.0446, wR_2 = 0.0932$                                | $R_1 = 0.0803, wR_2 = 0.1338$                                |
| Largest diff. peak and hole, $e\text{\AA}^{-3}$ | 0.695 and -0.495                                             | 1.558 and -1.154                                             | 0.521 and -0.704                                             | 1.583 and -0.593                                             |

**Table S5.** Crystal data and structure refinement parameters for compounds **9**.

|                                          | <b>9</b>                                                                                                                                                 |
|------------------------------------------|----------------------------------------------------------------------------------------------------------------------------------------------------------|
| Empirical formula                        | $C_{39}H_{41}BF_{15}GeN_3OSi_2$                                                                                                                          |
| Formula weight                           | 992.35                                                                                                                                                   |
| Temperature, K                           | 100(2)                                                                                                                                                   |
| Wavelength, Å                            | 0.71073                                                                                                                                                  |
| Crystal system                           | Triclinic                                                                                                                                                |
| Space group                              | $P\bar{1}$                                                                                                                                               |
| Unit cell dimensions                     | $a = 11.6826(7)$ Å<br>$b = 12.4053(8)$ Å<br>$c = 17.1901(11)$ Å<br>$\alpha = 83.572(2)^\circ$<br>$\beta = 87.402(2)^\circ$<br>$\gamma = 73.342(2)^\circ$ |
| Volume, Å <sup>3</sup>                   | 2371.5(3)                                                                                                                                                |
| Z                                        | 2                                                                                                                                                        |
| Density (calculated), g/cm <sup>3</sup>  | 1.390                                                                                                                                                    |
| Absorption coefficient, mm <sup>-1</sup> | 0.788                                                                                                                                                    |
| $F(000)$                                 | 1008.0                                                                                                                                                   |
| Crystal size, mm <sup>3</sup>            | 0.17 × 0.15 × 0.14                                                                                                                                       |
| $\theta$ range for data collection, °    | 1.991 to 32.561                                                                                                                                          |
| Limiting indices                         | $-17 \leq h \leq 16$ , $-18 \leq k \leq 17$ , $-24 \leq l \leq 26$                                                                                       |
| Reflections collected                    | 62263                                                                                                                                                    |

|                                                 |                                     |
|-------------------------------------------------|-------------------------------------|
| Independent reflections                         | 15738 [ $R_{\text{int}} = 0.1647$ ] |
| Absorption correction                           | Semi-empirical from equivalents     |
| Refinement method                               | Full-matrix least-squares on $F^2$  |
| Data /restraints/ parameter                     | 15738 / 0 / 569                     |
| Goodness-of-fit on $F^2$                        | 1.022                               |
| Final $R$ indices [ $I > 2\sigma(I)$ ]          | $R_1 = 0.0480$ , $wR_2 = 0.1174$    |
| $R$ indices (all data)                          | $R_1 = 0.0617$ , $wR_2 = 0.1253$    |
| Largest diff. peak and hole, $e\text{\AA}^{-3}$ | 0.915 and -1.854                    |

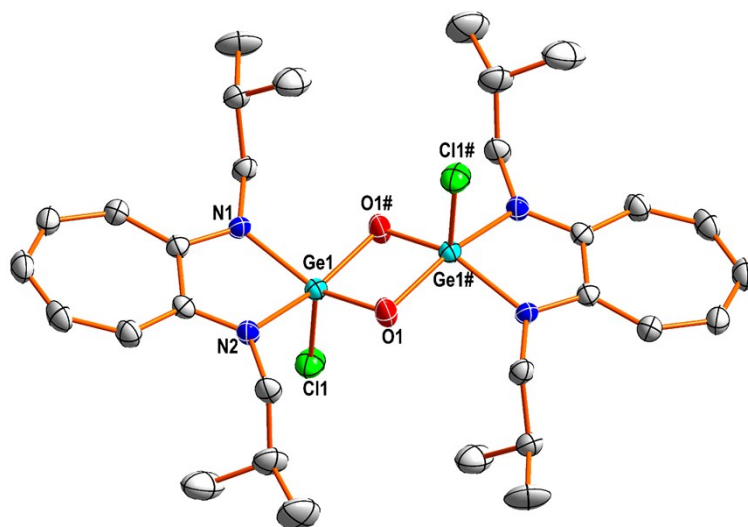

**Figure S53.** Molecular structure of  $\mu$ -oxo dimer **D1** with thermal ellipsoids at the 30% probability level. All hydrogen atoms are omitted for clarity. Selected bond lengths ( $\text{\AA}$ ) and angles (deg): Ge1-O1 1.822(2), Ge1-O1# 1.789(2), Ge1-Cl1 2.200(8), Ge1-N1 1.912(2), Ge1-N2 1.950(2); O1#-Ge1-O1 83.27(8), O1-Ge1-N1 93.71(8), O1#-Ge1-N2 91.39(8), O1-Ge1-N2 162.00(1), O1-Ge1-Cl1 98.72(7), O1#-Ge1-Cl1 110.38(8), N2-Ge1-N1 81.12(9), N1-Ge1-Cl1 103.58(7), N2-Ge1-Cl1 99.26(7). #Symmetry transformation used to generate equivalent atoms:  $-x+1, -y, -z+1$ . Data collection temperature: 293 K.

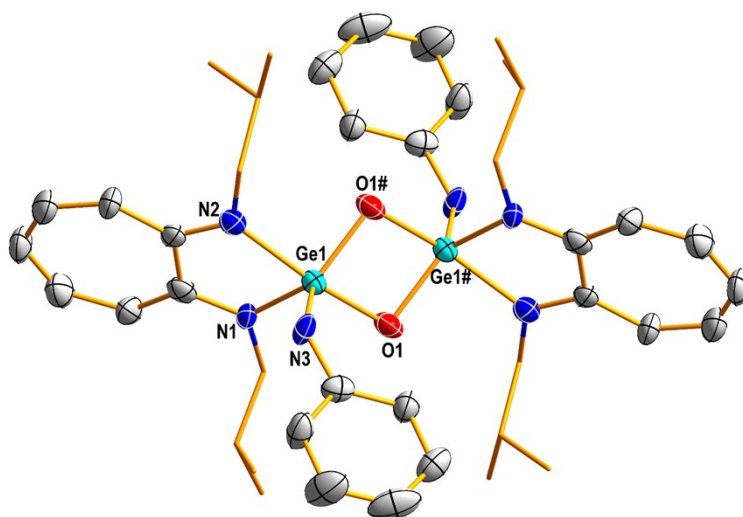

**Figure S54.** Molecular structure of  $\mu$ -oxo dimer **D3** with thermal ellipsoids at the 30% probability level. All hydrogen atoms are omitted for clarity. Selected bond lengths (Å) and angles (deg): Ge1-O1 1.807(3), Ge1-O1# 1.823(5), Ge1-N3 1.864(4), Ge1-N1 1.920(5), Ge1-N2 1.983(5); O1#-Ge1-O1 83.40(2), O1-Ge1-N1 131.40(2), O1#-Ge1-N2 165.93(2), O1-Ge1-N2 90.40(2), O1-Ge1-N3 117.1(2), O1#-Ge1-N3 103.7(2), N2-Ge1-N1 90.3(2), N1-Ge1-N3 110.45(2), N2-Ge1-N3 90.30(2). #Symmetry transformation used to generate equivalent atoms:  $-x+1, -y+1, -z+1$ . Data collection temperature: 293 K.

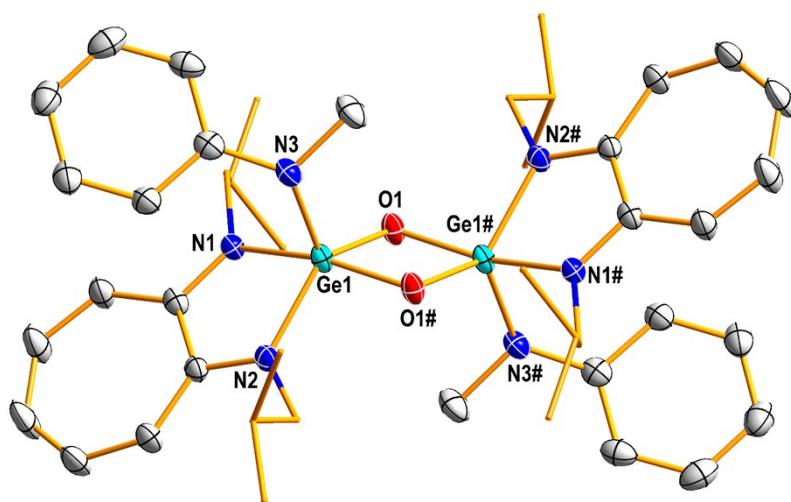

**Figure S55.** Molecular structure of  $\mu$ -oxo dimer **D4** with thermal ellipsoids at the 30% probability level. Two molecules present in the asymmetric unit, only one is shown here. All hydrogen atoms are omitted for clarity. Selected bond lengths ( $\text{\AA}$ ) and angles (deg): Ge1-O1 1.801(2), Ge1-O1# 1.836(2), Ge1-N3 1.875(2), Ge1-N1 1.978(2), Ge1-N2 1.925(2); O1#-Ge1-O1 83.72(7), O1-Ge1-N1 90.38(7), O1#-Ge1-N2 94.57(7), O1-Ge1-N2 130.71(8), O1-Ge1-N3 113.28(8), O1#-Ge1-N3 99.05(8), N2-Ge1-N1 79.66(7), N1-Ge1-N3 94.95(8), N2-Ge1-N3 115.59(8). #Symmetry transformations used to generate equivalent atoms:  $-x+1, -y+1, -z+1$ ;  $-x, -y+1, -z$ . Data collection temperature: 293 K.

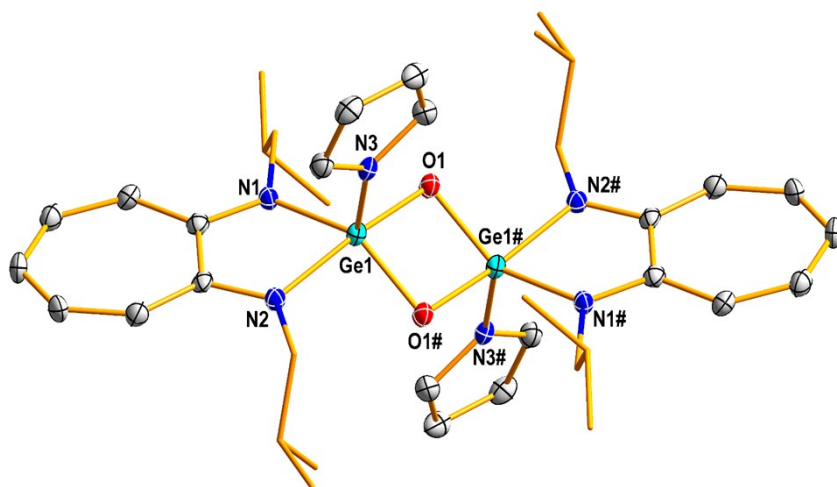

**Figure S56.** Molecular structure of  $\mu$ -oxo dimer **D5** with thermal ellipsoids at the 30% probability level. All hydrogen atoms and toluene are omitted for clarity. Selected bond lengths (Å) and angles (deg): Ge1-O1 1.801(2), Ge1-O1# 1.848(2), Ge1-N3 1.892(3), Ge1-N1 1.920(3), Ge1-N2 1.966(3); O1#-Ge1-O1 83.81(1), O1-Ge1-N1 136.46(1), O1#-Ge1-N2 167.76(1), O1-Ge1-N2 91.41(1), O1-Ge1-N3 115.24(1), O1#-Ge1-N3 97.29(1), N2-Ge1-N1 80.80(1), N1-Ge1-N3 108.11(1), N2-Ge1-N3 94.94(1). #Symmetry transformation used to generate equivalent atoms:  $-x, -y+2, -z$ . Data collection temperature: 273 K.

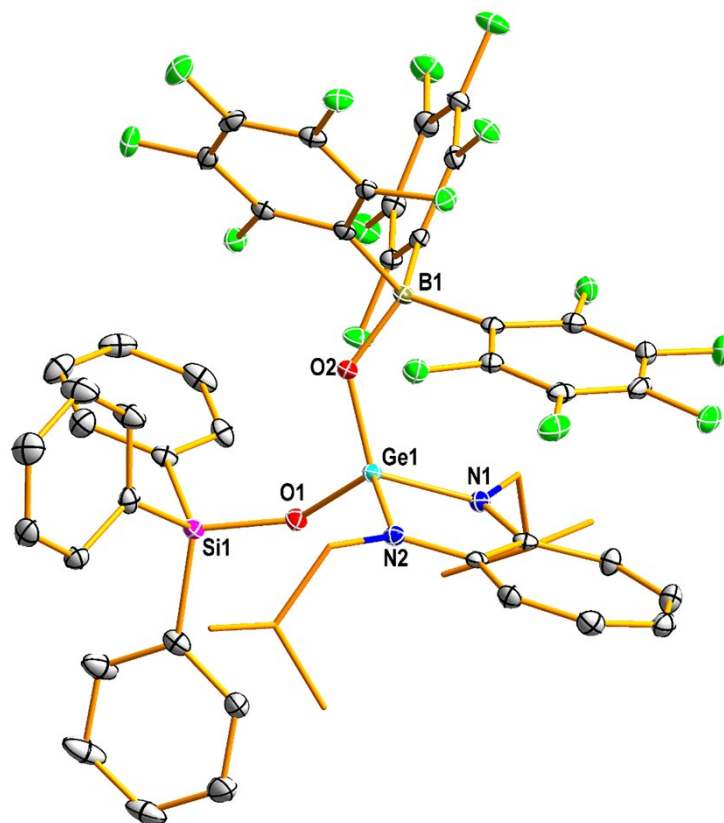

**Figure S57.** Molecular structure of germaester **2** with thermal ellipsoids at the 50% probability level. All hydrogen atoms are omitted for clarity. Selected bond lengths (Å) and angles (deg): Ge1-O2 1.696(2), O2-B1 1.497(3), Ge1-O1 1.719(2), Ge1-N1 1.847(2), Ge1-N2 1.849(2); O2-Ge1-N1 120.05(8), O2-Ge1-N2 113.29(8), O2-Ge1-O1 111.43(8), B1-O2-Ge1 130.94(2), N2-Ge1-N1 87.34(8), N1-Ge1-O1 110.46(8), N2-Ge1-O1 112.20(8). Data collection temperature: 100 K.



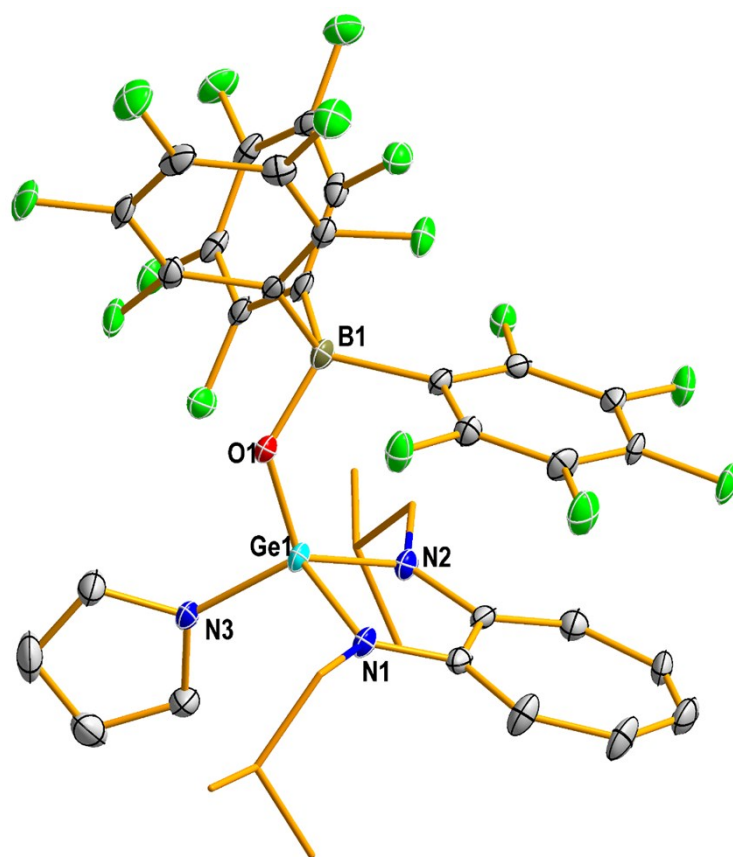

**Figure S58.** Molecular structure of *N*-germaacyl pyrrole **3**·CH<sub>2</sub>Cl<sub>2</sub> with thermal ellipsoids at the 50% probability level. All hydrogen atoms and a solvent molecule (CH<sub>2</sub>Cl<sub>2</sub>) are omitted for clarity. Selected bond lengths (Å) and angles (deg): Ge1-O1 1.695(3), O1-B1 1.494(6), Ge1-N3 1.819(4), Ge1-N1 1.836(4), Ge1-N2 1.851(4); O1-Ge1-N1 114.37(2), O1-Ge1-N2 120.92(2), O1-Ge1-N3 108.17(2), B1-O1-Ge1 129.0(3), N2-Ge1-N1 87.67(2), N1-Ge1-N3 110.33(2), N2-Ge1-N3 113.92(2). Data collection temperature: 100 K.

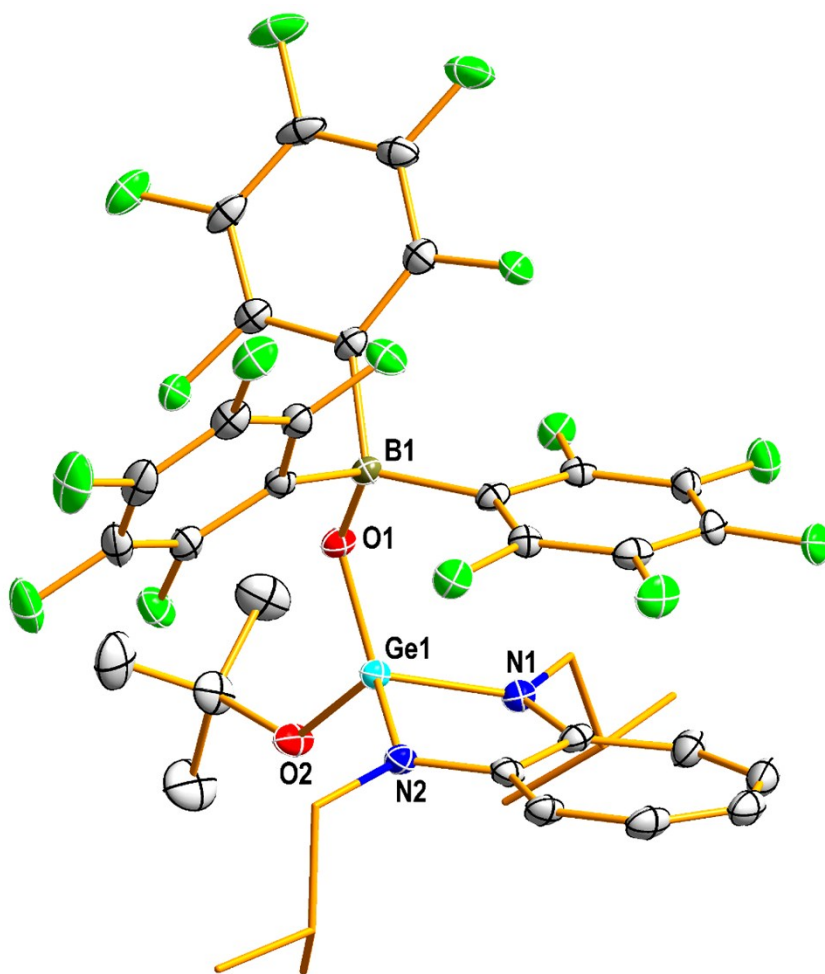

**Figure S59.** Molecular structure of germaester **5** with thermal ellipsoids at the 50% probability level. Two molecules present in the asymmetric unit, only one is shown here. All hydrogen atoms are omitted for clarity. Selected bond lengths (Å) and angles (deg): Ge1-O1 1.712(2), O1-B1 1.505(3), Ge1-O2 1.724(2), Ge1-N1 1.851(3), Ge1-N2 1.849(2); O1-Ge1-N1 115.42(1), O1-Ge1-N2 117.18(1), O1-Ge1-O2 113.62(9), B1-O1-Ge1 128.80(2), N2-Ge1-N1 86.79(1), N1-Ge1-O2 110.08(1), N2-Ge1-O2 110.87(1). Data collection temperature: 100 K.

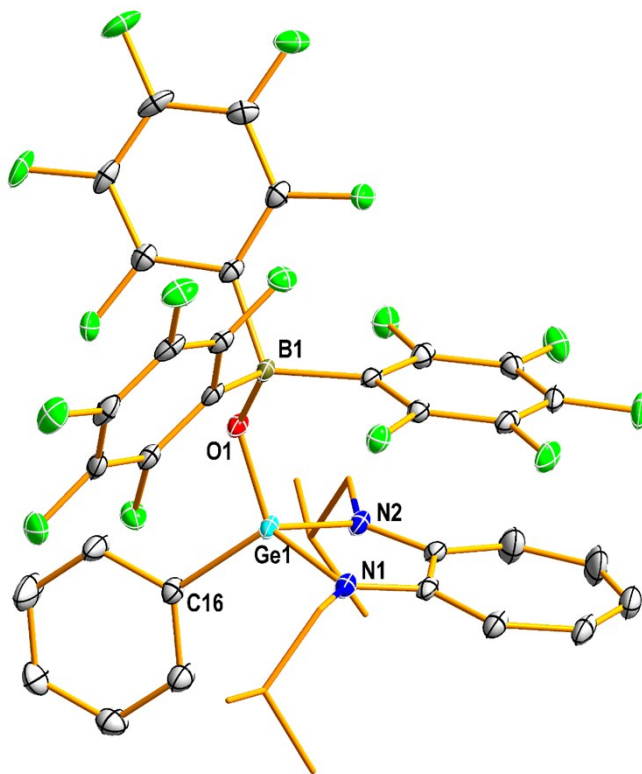

**Figure S60.** Molecular structure of germanone **6** with thermal ellipsoids at the 50% probability level. All hydrogen atoms and a solvent molecule ( $\text{CH}_2\text{Cl}_2$ ) are omitted for clarity. Selected bond lengths ( $\text{\AA}$ ) and angles (deg): Ge1-O1 1.720(2), O1-B1 1.481(3), Ge1-C16 1.914(2), Ge1-N1 1.866(2), Ge1-N2 1.861(2); O1-Ge1-N1 117.05(8), O1-Ge1-N2 111.42(9), O1-Ge1-C16 110.66(9), B1-O1-Ge1 131.26(2), N2-Ge1-N1 86.21(9), N1-Ge1-C16 117.70(1), N2-Ge1-C16 111.34(1). Data collection temperature: 100 K.

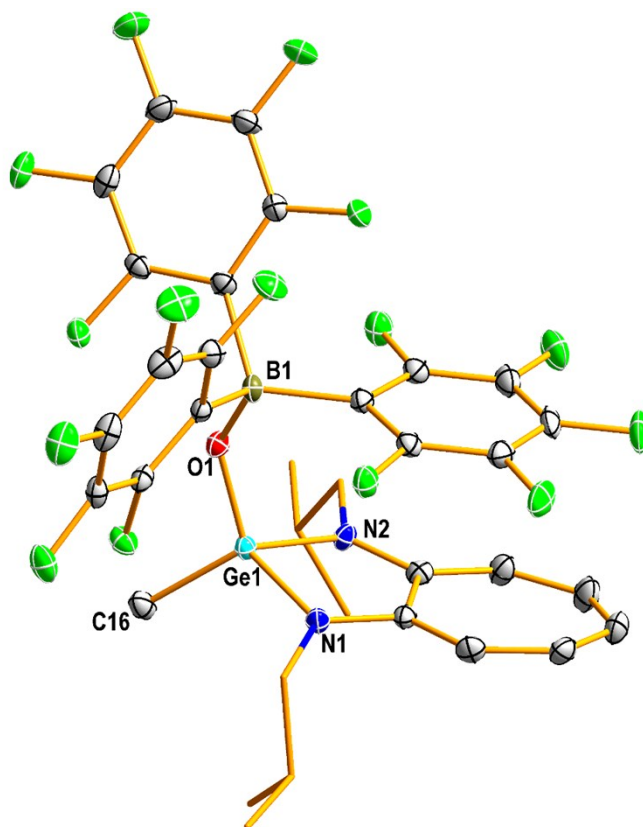

**Figure S61.** Molecular structure of germanone **7** with thermal ellipsoids at the 50% probability level. All hydrogen atoms and a solvent molecule ( $\text{CH}_2\text{Cl}_2$ ) are omitted for clarity. Selected bond lengths ( $\text{\AA}$ ) and angles (deg): Ge1-O1 1.716(2), O1-B1 1.475(4), Ge1-C16 1.901(3), Ge1-N1 1.859(3), Ge1-N2 1.867(3); O1-Ge1-N1 118.29(2), O1-Ge1-N2 108.96(1), O1-Ge1-C16 110.17(2), B1-O1-Ge1 133.7(2), N2-Ge1-N1 85.43(1), N1-Ge1-C16 114.15(2), N2-Ge1-C16 118.09(15). Data collection temperature: 100 K.

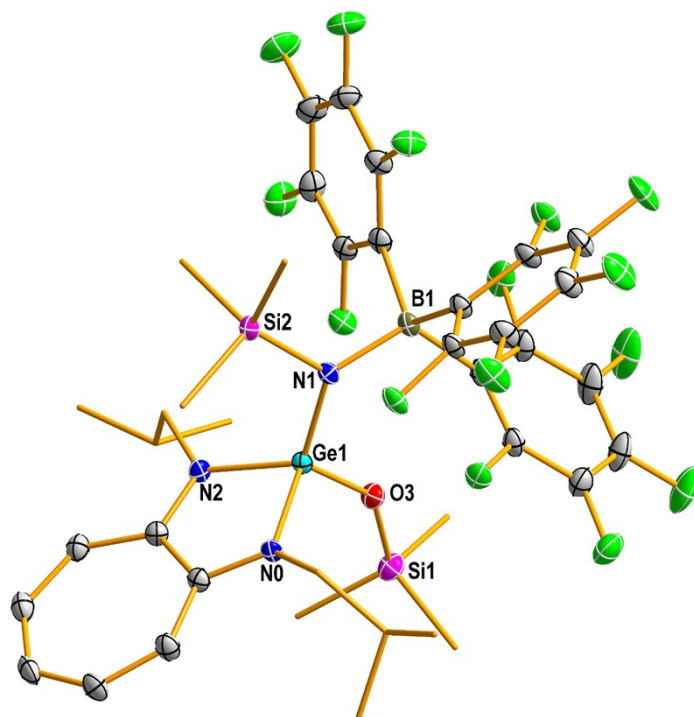

**Figure S62.** Molecular structure of germainine **9** with thermal ellipsoids at the 50% probability level. All hydrogen atoms are omitted for clarity. Selected bond lengths (Å) and angles (deg): Ge1-N1 1.782(1), N1-B1 1.592(3), Ge1-O3 1.734(2), Ge1-N2 1.874(2), Ge1-N0 1.869(2); O3-Ge1-N1 115.16(8), O3-Ge1-N2 108.79(8), O3-Ge1-N0 107.83(8), B1-N1-Ge1 124.06(2), N2-Ge1-N0 86.14(8). Data collection temperature: 100 K.

## 6. Computational Details

GAUSSIAN-09 programs were used for carrying out theoretical calculations.<sup>S8</sup> The geometries of compounds **1**, **2**, **3**, and **10** were optimized at the B3LYP level of theory using LANL2DZ basis set having Effective Core Potential (ECP) for core electrons of germanium and silicon atoms, and 6-31+G\*\* basis set for rest of the elements. For geometry optimizations coordinates obtained from single crystal X-ray diffraction studies were used. The frequency calculations were carried on the optimized geometries to characterize the stationary points as minima. The same level of theory and LANL2DZ/6-31G\*\* basis sets were used for performing the Weinhold's Natural Bond Orbital (NBO) calculations on the optimized geometries.<sup>S9-S10</sup> TDDFT<sup>S11</sup> calculations were carried out on the optimized geometries using toluene as a solvent with the aforementioned level of theory and LANL2DZ/6-31G\*\* basis sets. Chemcraft (<http://www.chemcraftprog.com>) was used for the visualization of Gaussian outputs and plotting the NBO interactions. EDA calculations were performed using a LANL2DZ basis set for germanium and silicon atoms, and a 6-31G\* basis set for rest of the atoms. These calculations were performed by treating Y-Ge=O→B(C<sub>6</sub>F<sub>5</sub>)<sub>3</sub> (Y = Cl **1**, OSiPh<sub>3</sub> **2**, NC<sub>4</sub>H<sub>4</sub> **3**, SPh **10**) as one fragment and ATI ligand as other fragment. The interaction energy of the two fragments can be represented as:  $\Delta E_{\text{int}} = \Delta E_{\text{Steric}} + \Delta E_{\text{orb}}$ .

**Table S6.** Nature of Ge-O and O→B bonds in compounds **1**, **2**, **3**, and **10**.

| Compound  | Bond        | Orbitals                             | Ionicity | % Contribution             | WBI  |
|-----------|-------------|--------------------------------------|----------|----------------------------|------|
| <b>1</b>  | <b>Ge-O</b> | $sp^{2.59}$ (Ge) and $sp^{1.62}$ (O) | 0.72     | 14.05% (Ge) and 85.95% (O) | 0.76 |
|           | <b>B-O</b>  | $sp^{3.93}$ (B) and $sp^{0.72}$ (O)  | 0.65     | 17.73% (B) and 82.27% (O)  | 0.63 |
| <b>2</b>  | <b>Ge-O</b> | $sp^{2.53}$ (Ge) and $sp^{2.89}$ (O) | 0.71     | 14.67% (Ge) and 85.33% (O) | 0.70 |
|           | <b>B-O</b>  | $sp^{3.75}$ (B) and $sp^{0.90}$ (O)  | 0.63     | 18.35% (B) and 81.65% (O)  | 0.66 |
| <b>3</b>  | <b>Ge-O</b> | $sp^{2.43}$ (Ge) and $sp^{2.57}$ (O) | 0.70     | 15.01% (Ge) and 84.99% (O) | 0.74 |
|           | <b>B-O</b>  | $sp^{3.84}$ (B) and $sp^{0.86}$ (O)  | 0.64     | 18.12% (B) and 81.88% (O)  | 0.65 |
| <b>10</b> | <b>Ge-O</b> | $sp^2$ (Ge) and $sp^{2.66}$ (O)      | 0.68     | 15.79% (Ge) and 84.21% (O) | 0.74 |
|           | <b>B-O</b>  | $sp^{3.87}$ (B) and $sp^{0.85}$ (O)  | 0.64     | 17.85% (B) and 82.15% (O)  | 0.63 |

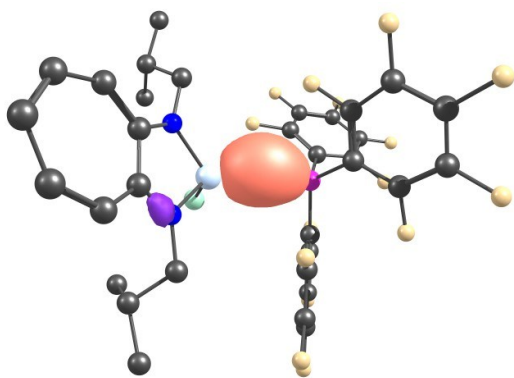

Compound 1

HOMO-128 (MO number: 74)

Contributions of Ge, O, and B to this MO are 4.54%, 86.49%, and 0.33%, respectively.

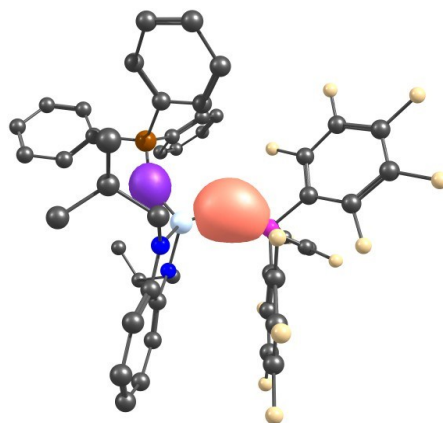

Compound 2

HOMO-172 (MO number: 89)

Contributions of Ge, O, and B to this MO are 3.04%, 79.24%, and 0.91%, respectively.

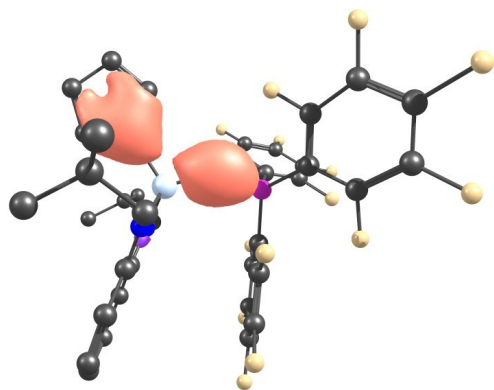

Compound 3

HOMO-137 (MO number: 74)

Contributions of Ge, O, and B to this MO are 3.27%, 51.36%, and 0.21%, respectively.

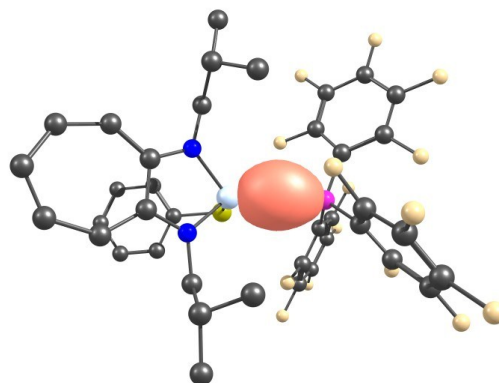

Compound 10

HOMO-142 (MO number: 80)

Contributions of Ge, O, and B to this MO are 3.90%, 88.75%, and 1.01%, respectively.

**Figure S63.** Molecular orbital of compounds 1, 2, 3, and 10 that shows the Ge-O bond. Atomic contributions were calculated using AOMix software.



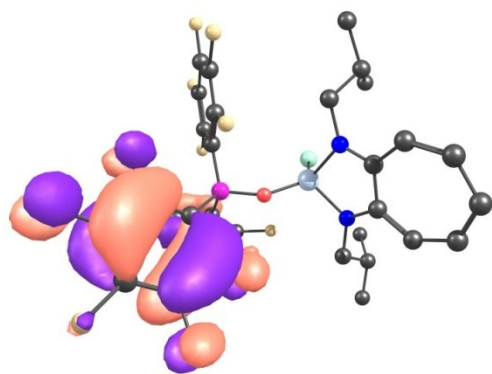

Compound **1** ( $\epsilon = -0.22124$  a.u.)

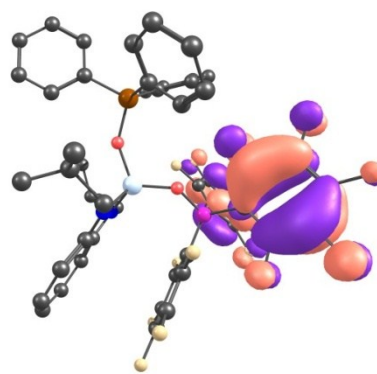

Compound **2** ( $\epsilon = -0.22103$  a.u.)

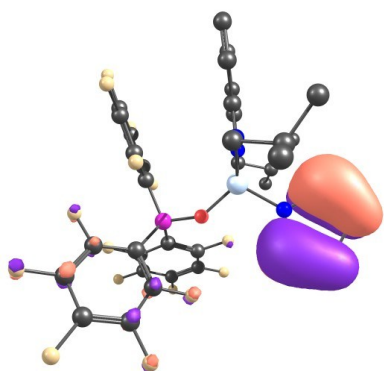

Compound **3** ( $\epsilon = -0.22059$  a.u.)

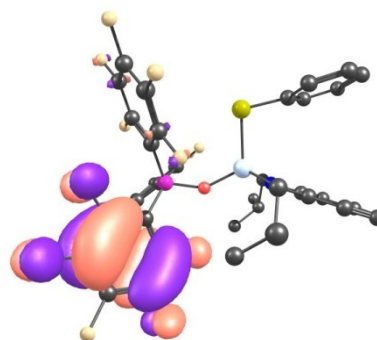

Compound **10** ( $\epsilon = -0.22064$  a.u.)

**Figure S64.** Pictorial representation of HOMOs of (a) compounds **1**, **2**, and **10** that are primarily localized on a phenyl ring of the  $B(C_6F_5)_3$  moiety and (b) compound **3** that is mainly localized on the pyrrole ring.

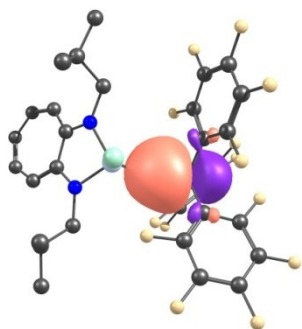

(a)  $sp^{0.29}(\text{O})$ - $sp^{4.39}(\text{B})$ ; 280.3 kcal/mol

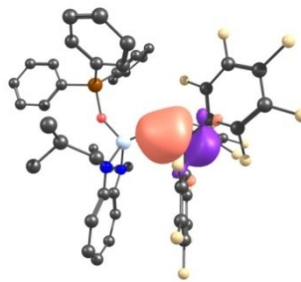

(b)  $sp^{0.42}(\text{O})$ - $sp^{4.11}(\text{B})$ ; 315.6 kcal/mol

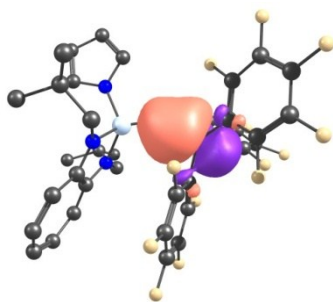

(c)  $sp^{0.32}(\text{O})$ - $sp^{4.24}(\text{B})$ ; 296.3 kcal/mol

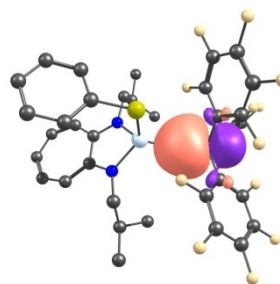

(d)  $sp^{0.32}(\text{O})$ - $sp^{4.41}(\text{B})$ ; 294.6 kcal/mol

**Figure S65.** Pictorial representation of NBO donor-acceptor interactions between:  $sp^x$  orbital of oxygen and  $sp^y$  orbital of boron in compounds **1** (a;  $x = 0.29$  and  $y = 4.39$ ), **2** (b;  $x = 0.42$  and  $y = 4.11$ ), **3** (c;  $x = 0.32$  and  $y = 4.24$ ), and **10** (d;  $x = 0.32$  and  $y = 4.41$ ).

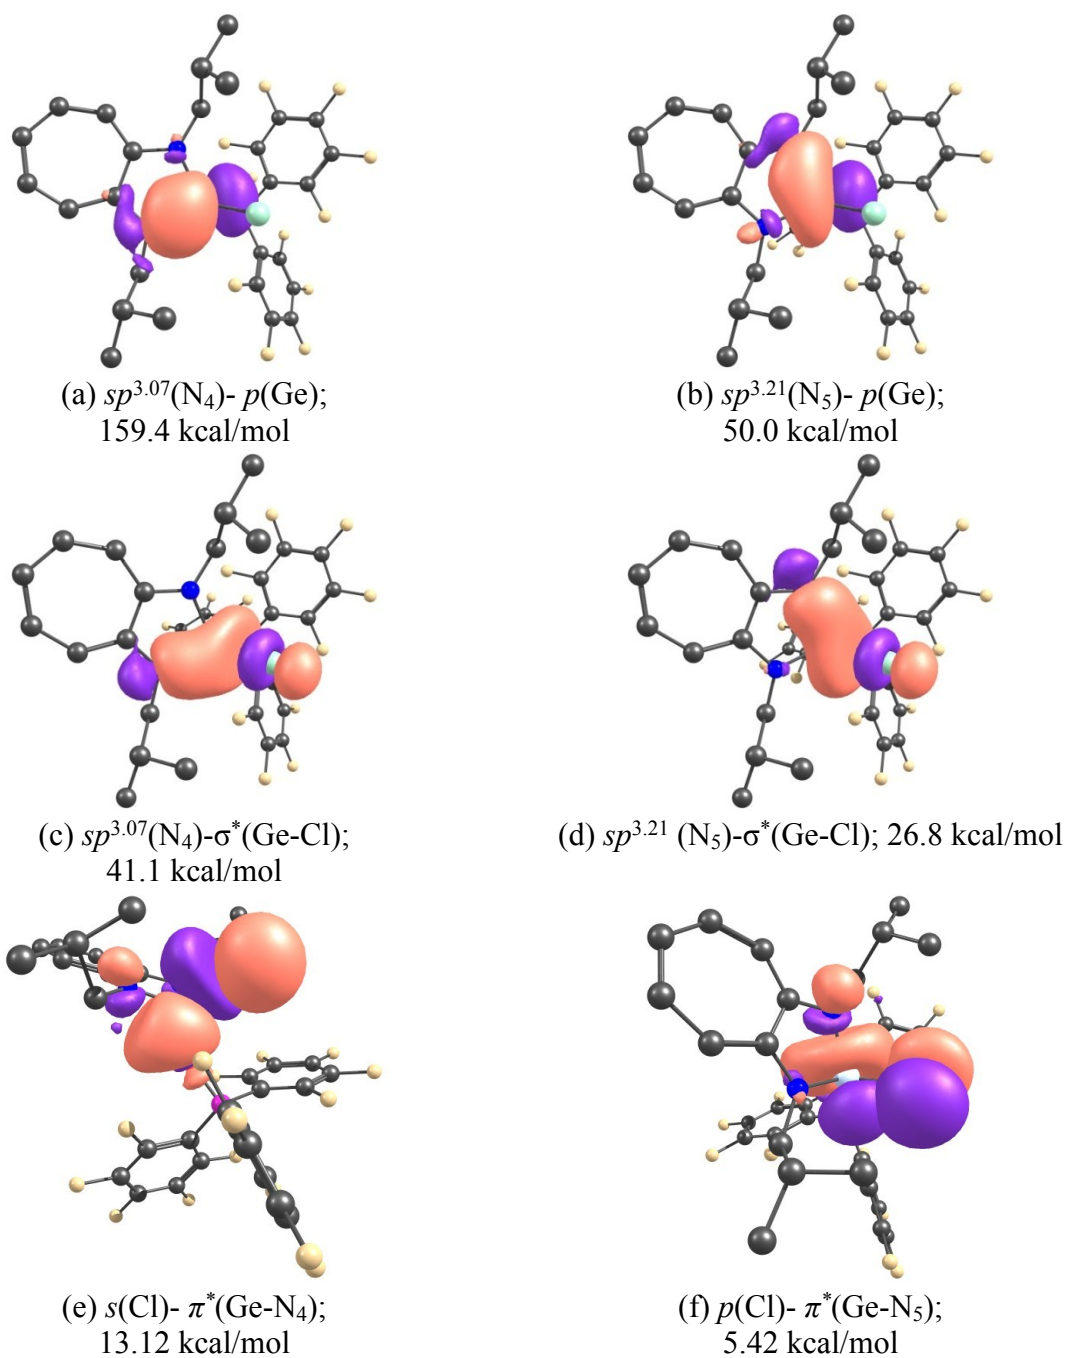

**Figure S66.** Pictorial representation of NBO donor-acceptor interactions in compound **1** between:  $sp^x$  ( $x = 3.07, 3.21$ ) hybrid orbitals of  $\text{N}_{\text{ATI}}$  atoms and vacant  $p$  orbital of germanium atom (a-b),  $sp^x$  ( $x=3.07, 3.21$ ) hybrid orbitals of  $\text{N}_{\text{ATI}}$  atoms and  $\sigma^*$  orbital of Ge-Cl bond (c-d), and  $s$  or  $p$  orbital of chlorine atom and  $\pi^*$  orbitals of Ge- $\text{N}_{\text{ATI}}$  bonds (e-f).

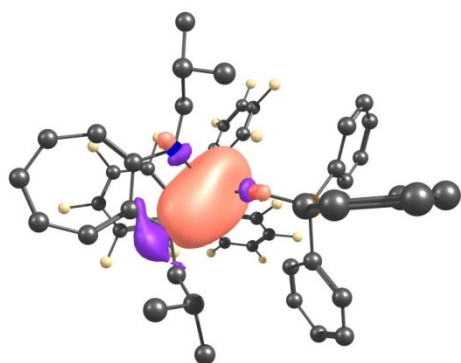

(a)  $sp^{3.22}(\text{N}_6)$ -  $s(\text{Ge})$ ; 126.2 kcal/mol

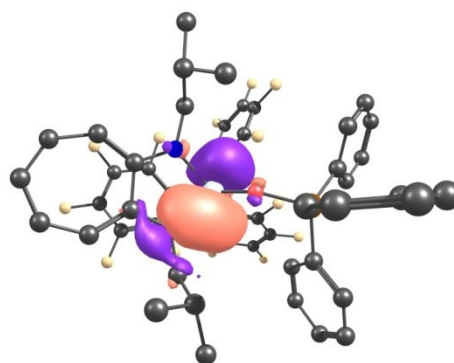

(b)  $sp^{3.22}(\text{N}_6)$ -  $p(\text{Ge})$ ; 87.2 kcal/mol

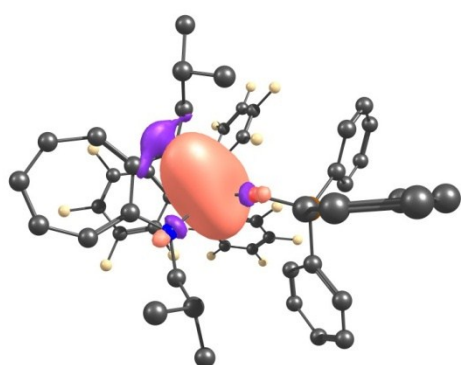

(c)  $sp^{3.11}(\text{N}_7)$ -  $s(\text{Ge})$ ; 134.3 kcal/mol

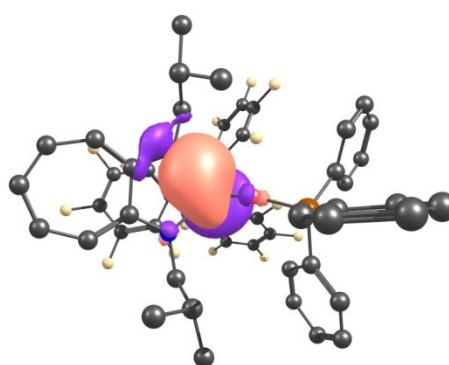

(d)  $sp^{3.11}(\text{N}_7)$ -  $p(\text{Ge})$ ; 49.2 kcal/mol

**Figure S67.** Pictorial representation of NBO donor-acceptor interactions between  $sp^x$  ( $x = 3.22, 3.11$ ) hybrid orbitals of  $\text{N}_{\text{ATI}}$  atoms and vacant  $s$  or  $p$  orbital of germanium atom in compound **2**.

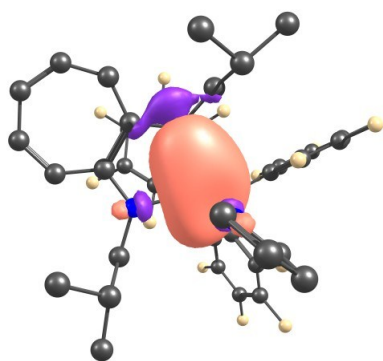

(a)  $sp^{3.20}(\text{N}_{18})-s(\text{Ge})$ ; 141.3 kcal/mol

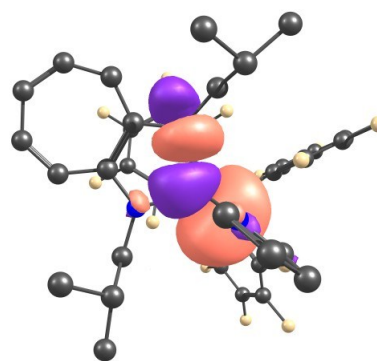

(b)  $sp^{3.20}(\text{N}_{18})-p(\text{Ge})$ ; 51.1 kcal/mol

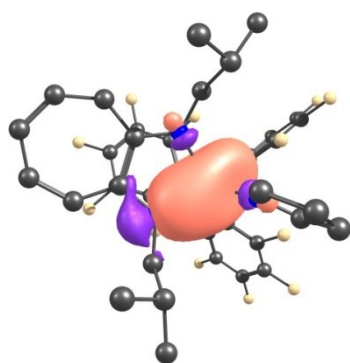

(c)  $sp^{3.29}(\text{N}_{20})-s(\text{Ge})$ ; 126.2 kcal/mol

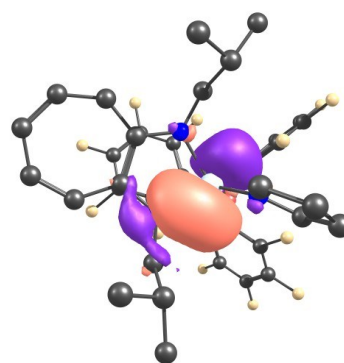

(d)  $sp^{3.29}(\text{N}_{20})-p(\text{Ge})$ ; 90.1 kcal/mol

**Figure S68.** Pictorial representation of NBO donor-acceptor interactions between  $sp^x$  ( $x = 3.20, 3.29$ ) hybrid orbitals of  $\text{N}_{\text{ATI}}$  atoms and vacant  $s$  or  $p$  orbital of germanium atom in compound **3**.

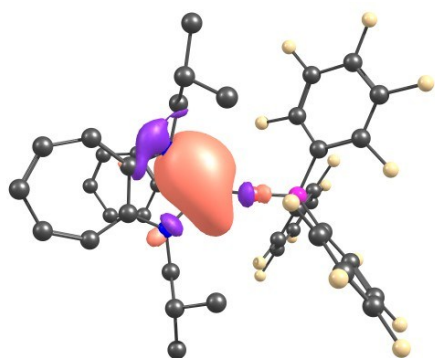

(a)  $sp^{3.11}(\text{N}_4)\text{-}sp^{1.45}(\text{Ge})$ ; 117.9 kcal/mol

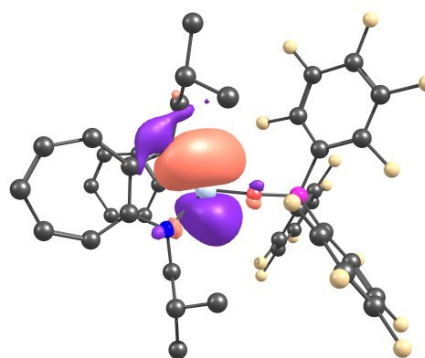

(b)  $sp^{3.11}(\text{N}_4)\text{-}p(\text{Ge})$ ; 49.8 kcal/mol

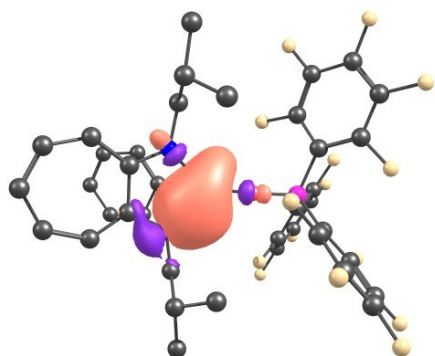

(c)  $sp^{3.09}(\text{N}_5)\text{-}sp^{1.45}(\text{Ge})$ ; 114.6 kcal/mol

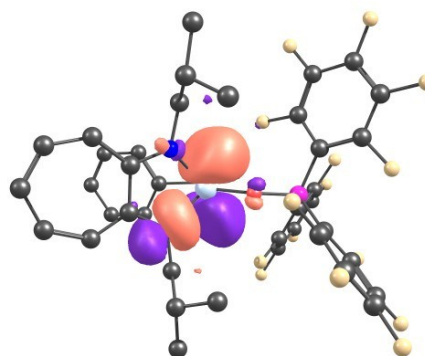

(d)  $sp^{3.09}(\text{N}_5)\text{-}p(\text{Ge})$ ; 46.7 kcal/mol

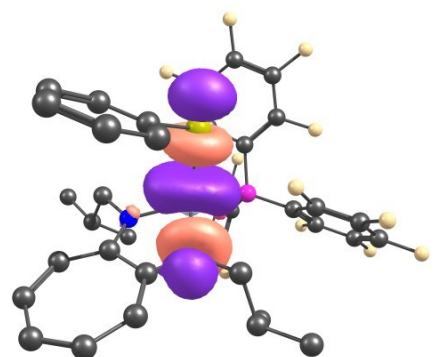

(e)  $sp^{3.11}(\text{N}_4)\text{-}\sigma^*(\text{Ge-S})$ ; 13.8 kcal/mol

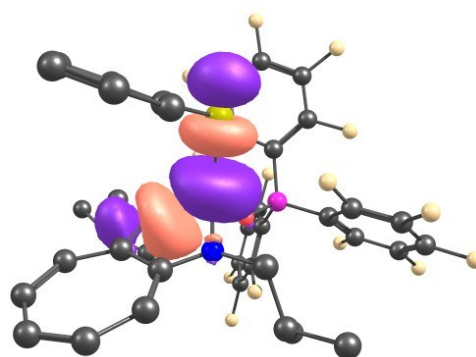

(f)  $sp^{3.09}(\text{N}_5)\text{-}\sigma^*(\text{Ge-S})$ ; 15.6 kcal/mol

**Figure S69.** Pictorial representation of NBO donor-acceptor interactions in compound **10** between  $sp^x$  ( $x = 3.11, 3.09$ ) hybrid orbitals of  $\text{N}_{\text{ATI}}$  atoms and  $sp^{1.45}$  or  $p$  orbital of germanium atom (a-d);  $sp^x$  ( $x = 3.11, 3.09$ ) hybrid orbitals of  $\text{N}_{\text{ATI}}$  atoms and  $\sigma^*$  orbital of Ge-S bond (e-f).

**Table S7.** EDA analysis on compounds **1**, **2**, **3**, and **10**.

| Compound                                                                                                                           | EDA* {YGe(O)B(C <sub>6</sub> F <sub>5</sub> ) <sub>3</sub> + ATI ligand} |                                   |                                |
|------------------------------------------------------------------------------------------------------------------------------------|--------------------------------------------------------------------------|-----------------------------------|--------------------------------|
|                                                                                                                                    | $\Delta E_{int}$<br>(kcal/mol)                                           | $\Delta E_{steric}$<br>(kcal/mol) | $\Delta E_{orb}$<br>(kcal/mol) |
| ( <i>i</i> -Bu) <sub>2</sub> ATIGe(O)(Cl)→B(C <sub>6</sub> F <sub>5</sub> ) <sub>3</sub> ( <b>1</b> )                              | -292.71                                                                  | 169.09                            | -461.80                        |
| ( <i>i</i> -Bu) <sub>2</sub> ATIGe(O)(OSiPh <sub>3</sub> )→B(C <sub>6</sub> F <sub>5</sub> ) <sub>3</sub> ( <b>2</b> )             | -281.32                                                                  | 177.98                            | -459.30                        |
| ( <i>i</i> -Bu) <sub>2</sub> ATIGe(O)(NC <sub>4</sub> H <sub>4</sub> )→B(C <sub>6</sub> F <sub>5</sub> ) <sub>3</sub> ( <b>3</b> ) | -285.87                                                                  | 220.73                            | -506.60                        |
| ( <i>i</i> -Bu) <sub>2</sub> ATIGe(O)(SPh)→B(C <sub>6</sub> F <sub>5</sub> ) <sub>3</sub> ( <b>10</b> )                            | -275.40                                                                  | 156.50                            | -431.90                        |
| * $E_{orb}$ = orbital energy, $E_{int}$ = interaction energy, $E_{steric}$ = steric energy, and $E_{int} = E_{steric} + E_{orb}$   |                                                                          |                                   |                                |

## 7. Coordinates of the Optimized Geometries of:

### Compound 1

|    |              |              |              |
|----|--------------|--------------|--------------|
| 32 | 1.592574000  | -0.292617000 | -0.675109000 |
| 17 | 1.480681000  | 0.047977000  | -2.809223000 |
| 8  | 0.133735000  | -0.284471000 | 0.158427000  |
| 7  | 2.642805000  | -1.749925000 | -0.128398000 |
| 7  | 2.963754000  | 0.798408000  | 0.009724000  |
| 5  | -1.309502000 | 0.156465000  | 0.130329000  |
| 9  | -0.873294000 | -2.254281000 | 1.702717000  |
| 9  | -1.572119000 | -2.722124000 | 4.232849000  |
| 9  | -2.953567000 | -0.839075000 | 5.671054000  |
| 9  | -3.608000000 | 1.544284000  | 4.490176000  |
| 9  | -2.906867000 | 2.058262000  | 1.976713000  |
| 9  | -0.512386000 | -2.222873000 | -1.693188000 |
| 9  | -2.201217000 | -3.830310000 | -2.937911000 |
| 9  | -4.912454000 | -3.423861000 | -2.796687000 |
| 9  | -5.878588000 | -1.315743000 | -1.331003000 |
| 9  | -4.194867000 | 0.331482000  | -0.054436000 |
| 9  | 0.000247000  | 2.352493000  | 1.508156000  |
| 9  | 0.155153000  | 4.913534000  | 0.763502000  |
| 9  | -1.043646000 | 5.764433000  | -1.551418000 |
| 9  | -2.390799000 | 3.959069000  | -3.111738000 |
| 9  | -2.548882000 | 1.406082000  | -2.414105000 |
| 6  | 3.698935000  | -1.367755000 | 0.634017000  |
| 6  | 4.536176000  | -2.323391000 | 1.243808000  |
| 1  | 4.292203000  | -3.349813000 | 1.003743000  |
| 6  | 5.629018000  | -2.189623000 | 2.098666000  |
| 1  | 6.080037000  | -3.132777000 | 2.398702000  |



|   |             |              |              |
|---|-------------|--------------|--------------|
| 6 | 6.213481000 | -1.042868000 | 2.632162000  |
| 1 | 7.057934000 | -1.185070000 | 3.300076000  |
| 6 | 5.802862000 | 0.268432000  | 2.401598000  |
| 1 | 6.356446000 | 1.038584000  | 2.933913000  |
| 6 | 4.783178000 | 0.753580000  | 1.585044000  |
| 1 | 4.679723000 | 1.831081000  | 1.604416000  |
| 6 | 3.854395000 | 0.097505000  | 0.753414000  |
| 6 | 2.198298000 | -3.155792000 | -0.243026000 |
| 1 | 1.140642000 | -3.133713000 | -0.511046000 |
| 1 | 2.248969000 | -3.613155000 | 0.751996000  |
| 6 | 2.945328000 | 2.271764000  | -0.081451000 |
| 1 | 2.868825000 | 2.691972000  | 0.928920000  |
| 1 | 2.015871000 | 2.543350000  | -0.590135000 |
| 6 | 2.962618000 | -4.017727000 | -1.273343000 |
| 1 | 4.031167000 | -4.012310000 | -1.016659000 |
| 6 | 4.124875000 | 2.914538000  | -0.848164000 |
| 1 | 5.062455000 | 2.639469000  | -0.348234000 |
| 6 | 2.821390000 | -3.483670000 | -2.705479000 |
| 1 | 3.365220000 | -4.126816000 | -3.405372000 |
| 1 | 3.222380000 | -2.470887000 | -2.807642000 |
| 1 | 1.770745000 | -3.462830000 | -3.016478000 |
| 6 | 2.454764000 | -5.465099000 | -1.166948000 |
| 1 | 1.389432000 | -5.525549000 | -1.418939000 |
| 1 | 2.584066000 | -5.871185000 | -0.156936000 |
| 1 | 2.996940000 | -6.115077000 | -1.861061000 |
| 6 | 4.217473000 | 2.439357000  | -2.304074000 |
| 1 | 3.313923000 | 2.701853000  | -2.865557000 |
| 1 | 4.349238000 | 1.355670000  | -2.375181000 |

|   |              |              |              |
|---|--------------|--------------|--------------|
| 1 | 5.070303000  | 2.913071000  | -2.801598000 |
| 6 | 3.979350000  | 4.443181000  | -0.767046000 |
| 1 | 4.819985000  | 4.935556000  | -1.266027000 |
| 1 | 3.949501000  | 4.797177000  | 0.269557000  |
| 1 | 3.058961000  | 4.778467000  | -1.259429000 |
| 6 | -1.807770000 | -0.049633000 | 1.703150000  |
| 6 | -1.524586000 | -1.256431000 | 2.354726000  |
| 6 | -1.888919000 | -1.539613000 | 3.668572000  |
| 6 | -2.592474000 | -0.589656000 | 4.401679000  |
| 6 | -2.920930000 | 0.618269000  | 3.797159000  |
| 6 | -2.531617000 | 0.859358000  | 2.479198000  |
| 6 | -2.263964000 | -0.851166000 | -0.776807000 |
| 6 | -1.840705000 | -1.934485000 | -1.543085000 |
| 6 | -2.696666000 | -2.801852000 | -2.221706000 |
| 6 | -4.069101000 | -2.601957000 | -2.152793000 |
| 6 | -4.554226000 | -1.531734000 | -1.405130000 |
| 6 | -3.655963000 | -0.698454000 | -0.746989000 |
| 6 | -1.316354000 | 1.730699000  | -0.385159000 |
| 6 | -0.628494000 | 2.700599000  | 0.355410000  |
| 6 | -0.530206000 | 4.041146000  | -0.002710000 |
| 6 | -1.135466000 | 4.478621000  | -1.177610000 |
| 6 | -1.818862000 | 3.558831000  | -1.963240000 |
| 6 | -1.888441000 | 2.222154000  | -1.562382000 |

### Compound 2

|    |              |              |              |
|----|--------------|--------------|--------------|
| 32 | 0.715521000  | 0.902006000  | -0.110170000 |
| 14 | 3.451133000  | -0.881906000 | 0.113175000  |
| 8  | 2.353489000  | 0.384133000  | -0.251803000 |
| 8  | -0.357514000 | -0.348396000 | 0.330123000  |
| 5  | -1.825354000 | -0.616478000 | 0.121196000  |
| 7  | 0.629510000  | 2.402154000  | 1.033303000  |
| 7  | 0.270434000  | 2.099274000  | -1.492943000 |
| 9  | -0.394524000 | -3.092946000 | 0.620068000  |
| 9  | -4.437085000 | -1.476973000 | -0.828933000 |
| 9  | -4.827477000 | -2.651686000 | 3.745878000  |
| 9  | -4.282879000 | -0.709578000 | 2.025618000  |
| 9  | 0.155481000  | -1.398896000 | -2.115929000 |
| 9  | -2.023698000 | 0.922733000  | 2.593077000  |
| 9  | -3.260975000 | 1.107687000  | -2.011372000 |
| 9  | -3.036236000 | -3.514708000 | -4.832778000 |
| 9  | -0.965554000 | -5.019412000 | 2.371891000  |
| 9  | -4.482862000 | 3.419075000  | -1.571862000 |
| 9  | -3.237132000 | 3.266664000  | 2.992623000  |
| 9  | -3.190569000 | -4.837943000 | 3.967806000  |
| 9  | -0.455161000 | -2.750080000 | -4.313684000 |
| 9  | -5.017667000 | -2.855571000 | -3.053675000 |
| 9  | -4.507019000 | 4.547061000  | 0.926508000  |
| 6  | 3.196065000  | -2.363751000 | -1.019618000 |
| 6  | -3.398936000 | -1.733642000 | 2.077163000  |
| 6  | -3.412478000 | -1.784068000 | -1.659780000 |
| 6  | -0.079319000 | 3.328550000  | -1.028835000 |
| 6  | -2.116374000 | -1.367244000 | -1.333338000 |

|   |              |              |              |
|---|--------------|--------------|--------------|
| 6 | -1.486427000 | -2.906833000 | 1.401652000  |
| 6 | -3.258514000 | 1.555547000  | -0.730339000 |
| 6 | -1.155790000 | -1.737143000 | -2.274087000 |
| 6 | -2.897907000 | -3.856584000 | 3.099144000  |
| 6 | -2.626110000 | 0.834647000  | 0.286002000  |
| 6 | -0.589111000 | 5.938808000  | 0.744024000  |
| 1 | -0.649385000 | 6.672583000  | 1.544617000  |
| 6 | 0.919613000  | 2.274116000  | 2.474316000  |
| 1 | 0.619791000  | 1.261921000  | 2.761436000  |
| 1 | 0.274556000  | 2.946732000  | 3.048251000  |
| 6 | -0.641398000 | 4.292205000  | -1.886874000 |
| 1 | -0.782546000 | 3.955823000  | -2.905780000 |
| 6 | -3.267521000 | 2.704478000  | 1.768381000  |
| 6 | -1.054596000 | 6.361578000  | -0.501288000 |
| 1 | -1.442362000 | 7.373852000  | -0.565499000 |
| 6 | 5.139228000  | -0.100805000 | -0.220152000 |
| 6 | -1.437132000 | -2.446316000 | -3.443064000 |
| 6 | 4.414238000  | -1.418474000 | 2.770081000  |
| 1 | 5.395715000  | -1.183284000 | 2.367251000  |
| 6 | -0.067267000 | 4.709063000  | 1.132983000  |
| 1 | 0.211371000  | 4.664713000  | 2.177370000  |
| 6 | 3.279698000  | -1.342487000 | 1.940754000  |
| 6 | -3.912862000 | 3.359647000  | 0.723656000  |
| 6 | 0.171089000  | 1.726204000  | -2.918552000 |
| 1 | -0.834965000 | 1.969352000  | -3.280519000 |
| 1 | 0.260600000  | 0.640520000  | -2.972723000 |
| 6 | -2.743613000 | -2.832794000 | -3.713574000 |
| 6 | -3.722841000 | -2.743941000 | 2.983397000  |

|   |              |              |              |
|---|--------------|--------------|--------------|
| 6 | 3.388978000  | -3.363594000 | -3.239230000 |
| 1 | 3.680201000  | -3.279265000 | -4.282648000 |
| 6 | 4.305239000  | -1.792793000 | 4.112943000  |
| 1 | 5.196107000  | -1.847967000 | 4.732781000  |
| 6 | -3.902500000 | 2.779642000  | -0.538107000 |
| 6 | 0.867964000  | 2.095996000  | -5.298609000 |
| 1 | 1.612232000  | 2.531424000  | -5.973261000 |
| 1 | -0.107011000 | 2.529423000  | -5.550225000 |
| 1 | 0.819802000  | 1.020565000  | -5.508328000 |
| 6 | -2.643440000 | 1.485075000  | 1.526443000  |
| 6 | 0.158827000  | 3.511675000  | 0.421013000  |
| 6 | -3.745729000 | -2.496140000 | -2.806964000 |
| 6 | 5.309691000  | 1.294607000  | -0.223980000 |
| 1 | 4.446816000  | 1.937206000  | -0.073093000 |
| 6 | 1.249135000  | 2.354554000  | -3.831963000 |
| 1 | 1.258900000  | 3.440453000  | -3.669236000 |
| 6 | 2.462354000  | -4.656133000 | -1.417270000 |
| 1 | 2.027993000  | -5.577002000 | -1.038511000 |
| 6 | -1.768100000 | -3.940221000 | 2.292340000  |
| 6 | 2.644304000  | -3.570146000 | -0.556032000 |
| 1 | 2.347370000  | -3.668923000 | 0.483401000  |
| 6 | 3.569292000  | -2.282374000 | -2.375198000 |
| 1 | 4.014182000  | -1.368030000 | -2.760690000 |
| 6 | -2.263107000 | -1.749978000 | 1.261596000  |
| 6 | 2.026099000  | -1.647242000 | 2.506879000  |
| 1 | 1.128496000  | -1.605668000 | 1.896711000  |
| 6 | 7.535005000  | -0.335590000 | -0.638317000 |
| 1 | 8.396974000  | -0.976147000 | -0.803834000 |

|   |              |              |              |
|---|--------------|--------------|--------------|
| 6 | -1.075216000 | 5.599956000  | -1.665080000 |
| 1 | -1.492517000 | 6.087299000  | -2.543244000 |
| 6 | 2.571472000  | 2.169190000  | 4.353503000  |
| 1 | 3.621982000  | 2.259899000  | 4.647493000  |
| 1 | 2.245408000  | 1.152613000  | 4.594696000  |
| 1 | 1.991900000  | 2.869824000  | 4.968228000  |
| 6 | 3.053454000  | -2.094859000 | 4.655808000  |
| 1 | 2.966240000  | -2.389622000 | 5.697984000  |
| 6 | 2.832286000  | -4.553897000 | -2.760157000 |
| 1 | 2.687803000  | -5.396003000 | -3.431334000 |
| 6 | 6.274059000  | -0.904168000 | -0.435038000 |
| 1 | 6.175087000  | -1.987026000 | -0.455295000 |
| 6 | 2.403349000  | 2.475445000  | 2.856728000  |
| 1 | 2.983496000  | 1.734215000  | 2.293839000  |
| 6 | 7.683954000  | 1.054350000  | -0.635023000 |
| 1 | 8.662413000  | 1.498656000  | -0.795821000 |
| 6 | 6.567123000  | 1.869716000  | -0.429830000 |
| 1 | 6.675156000  | 2.951213000  | -0.432894000 |
| 6 | 1.913376000  | -2.018185000 | 3.850250000  |
| 1 | 0.936697000  | -2.255144000 | 4.263226000  |
| 6 | 2.951845000  | 3.866906000  | 2.511669000  |
| 1 | 2.836584000  | 4.105722000  | 1.449401000  |
| 1 | 4.020578000  | 3.917273000  | 2.745372000  |
| 1 | 2.454005000  | 4.651273000  | 3.095735000  |
| 6 | 2.651906000  | 1.815847000  | -3.519719000 |
| 1 | 2.705193000  | 0.738804000  | -3.717951000 |
| 1 | 2.931202000  | 1.972654000  | -2.474394000 |
| 1 | 3.400862000  | 2.309796000  | -4.147959000 |

### Compound 3

|    |              |              |              |
|----|--------------|--------------|--------------|
| 32 | 1.276264000  | 0.239844000  | -1.143703000 |
| 9  | -0.867076000 | 1.696616000  | 2.665637000  |
| 9  | -2.426953000 | 4.635126000  | -1.221747000 |
| 9  | -3.722661000 | 0.349442000  | 1.872465000  |
| 9  | -0.848195000 | 2.510892000  | -1.265944000 |
| 9  | 0.059912000  | -2.621475000 | 0.853274000  |
| 9  | 0.568684000  | 1.084279000  | 4.806669000  |
| 9  | 1.787205000  | -1.359410000 | 5.035869000  |
| 9  | -4.294673000 | -2.294169000 | -3.228358000 |
| 9  | -2.600600000 | -2.388834000 | 1.951326000  |
| 9  | -4.678826000 | 4.694567000  | 0.344555000  |
| 9  | -5.296784000 | 2.515786000  | 1.891233000  |
| 9  | 1.515476000  | -3.192976000 | 3.012800000  |
| 9  | -2.583594000 | -0.426043000 | -2.401182000 |
| 9  | -5.197400000 | -4.224437000 | -1.502268000 |
| 9  | -4.320992000 | -4.225546000 | 1.093313000  |
| 8  | -0.357144000 | -0.113615000 | -0.890341000 |
| 7  | 2.296369000  | 1.239501000  | 0.078593000  |
| 7  | 1.472636000  | 0.809783000  | -2.875865000 |
| 7  | 2.459778000  | -1.175244000 | -0.778561000 |
| 5  | -1.361984000 | -0.141092000 | 0.230017000  |
| 6  | 0.417730000  | 0.163764000  | 3.836326000  |
| 6  | -0.531580000 | -0.446465000 | 1.640567000  |
| 6  | 1.042162000  | -1.071301000 | 3.956720000  |
| 6  | -2.226139000 | 1.276399000  | 0.272762000  |
| 6  | 3.358501000  | -0.889434000 | 0.192446000  |
| 6  | 0.136212000  | -1.665585000 | 1.813247000  |

|   |              |              |              |
|---|--------------|--------------|--------------|
| 6 | -1.960448000 | 2.421708000  | -0.477439000 |
| 6 | 0.900451000  | -1.997307000 | 2.927349000  |
| 6 | -0.337169000 | 0.449613000  | 2.696091000  |
| 6 | -3.376951000 | 1.378474000  | 1.063437000  |
| 6 | -3.873878000 | -3.292157000 | 0.233485000  |
| 6 | -2.949369000 | -1.366984000 | -1.494878000 |
| 6 | -2.758243000 | 3.566153000  | -0.471935000 |
| 6 | 3.270780000  | 0.506371000  | 0.684392000  |
| 6 | 2.251438000  | -2.490615000 | -1.417829000 |
| 1 | 1.168946000  | -2.610022000 | -1.525654000 |
| 1 | 2.569006000  | -3.291276000 | -0.743623000 |
| 6 | 1.946341000  | 2.638158000  | 0.409413000  |
| 1 | 2.227439000  | 2.859373000  | 1.442888000  |
| 1 | 0.856905000  | 2.703760000  | 0.375678000  |
| 6 | -2.963020000 | -2.320972000 | 0.648069000  |
| 6 | -3.858225000 | -2.317600000 | -1.954781000 |
| 6 | 0.456094000  | 0.860210000  | -3.828985000 |
| 1 | -0.560658000 | 0.625648000  | -3.551831000 |
| 6 | -3.897193000 | 3.603814000  | 0.322645000  |
| 6 | -4.207637000 | 2.493880000  | 1.104073000  |
| 6 | 5.644375000  | -0.765571000 | 2.470894000  |
| 1 | 6.441942000  | -0.966093000 | 3.180020000  |
| 6 | -2.443843000 | -1.329819000 | -0.189327000 |
| 6 | 5.114096000  | 0.520714000  | 2.460995000  |
| 1 | 5.554046000  | 1.219583000  | 3.168737000  |
| 6 | 4.264259000  | -1.861467000 | 0.664181000  |
| 1 | 4.178387000  | -2.822242000 | 0.173787000  |
| 6 | 5.244910000  | -1.820309000 | 1.650873000  |



|   |              |              |              |
|---|--------------|--------------|--------------|
| 1 | 5.774336000  | -2.759161000 | 1.795748000  |
| 6 | 2.914786000  | -2.641204000 | -2.804076000 |
| 1 | 2.549784000  | -1.818911000 | -3.433022000 |
| 6 | 4.093434000  | 1.063879000  | 1.679902000  |
| 1 | 3.899439000  | 2.107696000  | 1.887638000  |
| 6 | -4.323177000 | -3.295911000 | -1.082185000 |
| 6 | 4.063225000  | 3.743999000  | -0.549022000 |
| 1 | 4.421839000  | 4.458148000  | -1.297497000 |
| 1 | 4.511674000  | 2.772542000  | -0.782199000 |
| 1 | 4.446344000  | 4.071745000  | 0.425816000  |
| 6 | 2.529058000  | 3.691805000  | -0.557523000 |
| 1 | 2.203657000  | 3.417236000  | -1.569272000 |
| 6 | 1.922068000  | 5.063240000  | -0.221266000 |
| 1 | 2.193640000  | 5.380454000  | 0.793721000  |
| 1 | 0.829803000  | 5.048228000  | -0.292279000 |
| 1 | 2.290113000  | 5.825112000  | -0.915666000 |
| 6 | 2.409181000  | 1.429710000  | -4.822210000 |
| 1 | 3.139074000  | 1.736410000  | -5.559259000 |
| 6 | 2.669945000  | 1.158349000  | -3.499914000 |
| 1 | 3.599721000  | 1.187169000  | -2.950029000 |
| 6 | 1.006572000  | 1.238596000  | -5.029802000 |
| 1 | 0.464500000  | 1.371442000  | -5.955926000 |
| 6 | 2.451608000  | -3.965052000 | -3.433415000 |
| 1 | 2.870286000  | -4.079923000 | -4.438269000 |
| 1 | 1.360695000  | -4.011914000 | -3.519397000 |
| 1 | 2.780462000  | -4.825204000 | -2.836459000 |
| 6 | 4.446779000  | -2.555777000 | -2.756447000 |
| 1 | 4.793371000  | -1.619175000 | -2.307709000 |

|   |             |              |              |
|---|-------------|--------------|--------------|
| 1 | 4.860950000 | -2.606311000 | -3.768654000 |
| 1 | 4.874980000 | -3.389436000 | -2.185105000 |

**Compound 10**

|    |              |              |              |
|----|--------------|--------------|--------------|
| 32 | -1.379669000 | 0.089882000  | -0.091164000 |
| 8  | 0.247342000  | 0.119047000  | 0.365025000  |
| 16 | -1.752104000 | -0.329247000 | -2.269000000 |
| 7  | -2.416681000 | 1.542955000  | 0.561173000  |
| 7  | -2.522609000 | -0.982154000 | 0.984809000  |
| 5  | 1.682855000  | -0.035259000 | -0.109753000 |
| 9  | 4.367734000  | 1.165964000  | 0.810593000  |
| 9  | 5.173569000  | 3.657441000  | 0.410280000  |
| 9  | 3.635259000  | 5.429083000  | -1.005641000 |
| 9  | 1.223975000  | 4.596443000  | -2.027214000 |
| 9  | 0.393527000  | 2.089625000  | -1.666727000 |
| 9  | 3.058601000  | 0.545527000  | -2.826413000 |
| 9  | 3.007413000  | -1.033599000 | -4.950364000 |
| 9  | 1.711945000  | -3.445855000 | -4.887244000 |
| 9  | 0.444546000  | -4.231273000 | -2.579096000 |
| 9  | 0.478388000  | -2.668966000 | -0.418641000 |
| 9  | 1.409677000  | 0.645220000  | 2.741991000  |
| 9  | 2.563073000  | -0.548042000 | 4.820989000  |
| 9  | 4.330487000  | -2.610708000 | 4.447800000  |
| 9  | 4.906165000  | -3.443062000 | 1.899342000  |
| 9  | 3.774620000  | -2.280446000 | -0.200822000 |
| 6  | -3.527053000 | 1.150342000  | 1.229047000  |
| 6  | -4.519033000 | 2.078868000  | 1.607517000  |
| 1  | -4.309023000 | 3.100032000  | 1.318671000  |

|   |              |              |              |
|---|--------------|--------------|--------------|
| 6 | -5.726837000 | 1.926971000  | 2.286138000  |
| 1 | -6.277962000 | 2.853643000  | 2.430916000  |
| 6 | -6.327808000 | 0.779387000  | 2.798075000  |
| 1 | -7.281332000 | 0.903521000  | 3.302916000  |
| 6 | -5.820408000 | -0.515409000 | 2.709921000  |
| 1 | -6.435994000 | -1.295111000 | 3.153203000  |
| 6 | -4.638325000 | -0.976510000 | 2.134843000  |
| 1 | -4.506599000 | -2.047473000 | 2.211402000  |
| 6 | -3.585848000 | -0.305703000 | 1.476452000  |
| 6 | -2.146240000 | 2.951085000  | 0.213967000  |
| 1 | -3.034073000 | 3.372977000  | -0.276111000 |
| 1 | -1.354353000 | 2.946972000  | -0.537136000 |
| 6 | -2.390036000 | -2.447982000 | 1.079374000  |
| 1 | -3.331774000 | -2.908799000 | 0.753625000  |
| 1 | -1.630577000 | -2.745835000 | 0.353756000  |
| 6 | -1.712549000 | 3.857079000  | 1.391656000  |
| 1 | -2.507957000 | 3.854069000  | 2.148417000  |
| 6 | -1.983279000 | -2.995401000 | 2.468173000  |
| 1 | -2.741959000 | -2.693287000 | 3.202408000  |
| 6 | -0.426274000 | 3.369441000  | 2.069372000  |
| 1 | 0.418474000  | 3.378275000  | 1.373062000  |
| 1 | -0.520915000 | 2.350784000  | 2.453253000  |
| 1 | -0.172586000 | 4.022180000  | 2.911295000  |
| 6 | -1.565654000 | 5.295710000  | 0.868801000  |
| 1 | -1.283344000 | 5.972071000  | 1.681867000  |
| 1 | -2.499273000 | 5.670330000  | 0.431935000  |
| 1 | -0.787187000 | 5.358919000  | 0.099400000  |
| 6 | -0.630647000 | -2.449178000 | 2.940455000  |

|   |              |              |              |
|---|--------------|--------------|--------------|
| 1 | 0.171028000  | -2.736452000 | 2.252993000  |
| 1 | -0.387252000 | -2.847751000 | 3.930951000  |
| 1 | -0.632685000 | -1.357911000 | 3.011793000  |
| 6 | -1.975900000 | -4.531452000 | 2.400879000  |
| 1 | -2.952427000 | -4.933853000 | 2.105394000  |
| 1 | -1.720983000 | -4.957274000 | 3.376519000  |
| 1 | -1.231901000 | -4.888439000 | 1.678893000  |
| 6 | -3.551697000 | -0.448897000 | -2.303511000 |
| 6 | -4.334451000 | 0.701227000  | -2.480671000 |
| 1 | -3.853710000 | 1.671996000  | -2.550089000 |
| 6 | -5.723407000 | 0.591259000  | -2.589407000 |
| 1 | -6.323233000 | 1.485738000  | -2.731607000 |
| 6 | -6.336768000 | -0.663728000 | -2.532041000 |
| 1 | -7.415542000 | -0.747436000 | -2.625601000 |
| 6 | -5.555811000 | -1.812095000 | -2.370217000 |
| 1 | -6.025006000 | -2.791461000 | -2.341530000 |
| 6 | -4.166785000 | -1.708618000 | -2.256814000 |
| 1 | -3.556847000 | -2.600041000 | -2.148646000 |
| 6 | 2.295355000  | 1.490811000  | -0.350113000 |
| 6 | 3.521927000  | 1.967478000  | 0.123445000  |
| 6 | 3.985809000  | 3.268445000  | -0.084158000 |
| 6 | 3.212757000  | 4.171156000  | -0.804221000 |
| 6 | 1.991961000  | 3.744711000  | -1.317314000 |
| 6 | 1.580170000  | 2.437835000  | -1.084771000 |
| 6 | 1.728513000  | -0.946459000 | -1.498595000 |
| 6 | 2.369109000  | -0.611924000 | -2.696909000 |
| 6 | 2.376188000  | -1.426749000 | -3.830493000 |
| 6 | 1.724914000  | -2.654329000 | -3.804026000 |

|   |             |              |              |
|---|-------------|--------------|--------------|
| 6 | 1.084283000 | -3.046895000 | -2.633801000 |
| 6 | 1.107750000 | -2.197957000 | -1.534395000 |
| 6 | 2.463472000 | -0.791667000 | 1.143956000  |
| 6 | 2.236705000 | -0.393883000 | 2.466692000  |
| 6 | 2.841408000 | -0.980393000 | 3.575152000  |
| 6 | 3.742266000 | -2.024068000 | 3.392369000  |
| 6 | 4.026055000 | -2.444826000 | 2.098793000  |
| 6 | 3.396041000 | -1.825428000 | 1.019123000  |

## 8. References

- S1. S. Sinhababu, R. K. Siwatch, G. Mukherjee, G. Rajaraman and S. Nagendran, *Inorg. Chem.*, 2012, **51**, 9240.
- S2. S. Karwasara, R. K. Siwatch, C. K. Jha and S. Nagendran, *Organometallics*, 2015, **34**, 3246.
- S3. S. Karwasara, M. K. Sharma, R. Tripathi and S. Nagendran, *Organometallics*, 2013, **32**, 3830.
- S4. SMART: Bruker Molecular Analysis Research Tool, Version 5.618; Bruker AXS: Madison, WI, **2000**.
- S5. SAINT-NT, Version 6.04; Bruker AXS: Madison, WI, 2001.
- S6. SHELXTL-NT, Version 6.10; Bruker AXS: Madison, WI, 2000.
- S7. O. V. Dolomanov, L. J. Bourhis, R. J. Gildea, J. A. K. Howard and H. Puschmann, OLEX2: A complete structure solution, refinement and analysis program, *J. Appl. Crystallogr.* 2009, **42**, 339.
- S8. M. J. Frisch, G. W. Trucks, H. A. Schlegel, G. E. Scuseria, M. A. Robb, J. A. Cheeseman, J. A. Montgomery, T. Vreven, K. N. Kudin, J. C. Burant, J. M. Millam, S. S. Iyengar, J. Tomasi, V. Barone, M. Mennucci, M. Cossi, G. Scalmani, N. Rega, G. A. Petersson, H. Nakatsuji, M. Hada, M. Ehara, K. Toyota, R. Fukuda, J. Hasegawa, M. Ishida, M. Nakajima, Y. Honda, K. Kitao, H. Nakai, M. Klene, X. Li, J. E. Knox, H. P. Hratchian, J. B. Cross, V. Bakken, V. Adamo, J. Jaramillo, R. Gomperts, R. E. Stratmann, O. Yazyev, A. J. Austin, R. Cammi, C. Pomelli, J. W. Ochterski, P. Y. Ayala, K. Morokuma, J. A. Voth, P. Salvador, J. J. Dannenberg, V. G. Zakrzewski, S. Dapprich, A. D. Daniels, M. C. Strain, O. Farkas, D. A. Malick, A. D. Rabuck, K. Raghavachari, J. B. Foresman, J. V. Ortiz, Q. Cui, A. G. Baboul, G. Clifford, J. Cioslowski, B. B. Stefanov, G. Liu, A. Liashenko, P. Piskorz, I.

Komaromi, R. A. Martin, D. J. Fox, T. Keith, M. A. Al-Laham, C. Y. Peng, A. Nanayakkara, M. Challacombe, P. M. W. Gill, B. Johnson, W. Chen, M. W. Wong, C. Gonzalez and J. A. Pople, *Gaussian-03, Gaussian, Inc., Wallingford, CT, 2004.*

S9. F. Weinhold and C. Landis, *Valency and Bonding*; Cambridge: Cambridge, 2005.

S10. (a) A. E. Reed, L. A. Curtiss and F. Weinhold, *Chem. Rev.* 1988, **88**, 899. (b) E. D. Glendening, A. E. Reed, J. E. Carpenter and F. Weinhold, NBO Version 3.1.

S11. R. E. Stratmann, G. E. Scuseria and M. J. Frisch, *J. Chem. Phys.* 1998, **109**, 8218.
